# Supplementary material
Source: publisher figshare collection journal article supplement (https://springernature.figshare.com/ndownloader/files/23393300)
Supplement: Supplementary file 1 [file 23393300]

Country	SiteID	Pool #	Borrelia miyamotoi	B. burgdorferi sensu lato	B. afzelii	B. burgdorferi sensu strictu	B. garinii	B. lusitaniae	B. spielmanii	B. valaisiana	Anaplasma phagocytophilum	Babesia divergens	B. microti	B. venatorum	Neoehrlichia mikurensis	Rickettsia helvetica	SFG	Tick species found
DK	DK-000	1	Fail	Fail	Fail	Fail	Fail	Fail	Fail	Fail	Fail	Fail	Fail	Fail	Pass	Fail	Fail	Ixodes ricinus
DK	DK-000	2	Fail	Fail	Fail	Fail	Fail	Fail	Fail	Fail	Fail	Fail	Fail	Fail	Fail	Fail	Fail	Ixodes ricinus
DK	DK-000	3	Fail	Fail	Fail	Fail	Fail	Fail	Fail	Fail	Fail	Fail	Fail	Fail	Fail	Fail	Fail	Ixodes ricinus
DK	DK-000	4	Fail	Fail	Fail	Fail	Fail	Fail	Fail	Fail	Fail	Fail	Fail	Fail	Fail	Fail	Fail	Ixodes ricinus
DK	DK-000	5	Fail	Pass	Fail	Fail	Pass	Fail	Pass	Fail	Fail	Fail	Fail	Fail	Fail	Fail	Fail	Ixodes ricinus
DK	DK-000	6	Fail	Fail	Fail	Fail	Fail	Fail	Fail	Fail	Fail	Fail	Fail	Fail	Fail	Fail	Fail	Ixodes ricinus
DK	DK-000	7	Fail	Fail	Fail	Fail	Fail	Fail	Fail	Fail	Fail	Fail	Fail	Fail	Fail	Fail	Fail	Ixodes ricinus
DK	DK-000	8	Fail	Pass	Fail	Fail	Pass	Fail	Fail	Fail	Fail	Fail	Fail	Fail	Fail	Pass	Pass	Ixodes ricinus
DK	DK-000	9	Fail	Fail	Fail	Fail	Fail	Fail	Fail	Fail	Fail	Fail	Fail	Fail	Fail	Fail	Fail	Ixodes ricinus
DK	DK-000	10	Fail	Pass	Pass	Fail	Fail	Fail	Fail	Fail	Fail	Fail	Fail	Fail	Fail	Fail	Fail	Ixodes ricinus
DK	DK-000	11	Fail	Pass	Fail	Fail	Fail	Fail	Fail	Fail	Fail	Fail	Fail	Fail	Fail	Fail	Fail	Ixodes ricinus
DK	DK-000	12	Fail	Pass	Fail	Fail	Fail	Fail	Fail	Pass	Fail	Fail	Fail	Fail	Fail	Fail	Fail	Ixodes ricinus
DK	DK-000	13	Fail	Fail	Fail	Fail	Fail	Fail	Fail	Fail	Fail	Fail	Fail	Fail	Fail	Fail	Fail	Ixodes ricinus
DK	DK-000	14	Fail	Pass	Pass	Fail	Fail	Fail	Fail	Fail	Fail	Fail	Fail	Fail	Fail	Fail	Fail	Ixodes ricinus
DK	DK-000	15	Fail	Pass	Pass	Fail	Fail	Fail	Fail	Fail	Fail	Fail	Fail	Fail	Fail	Fail	Fail	Ixodes ricinus
DK	DK-000	16	Fail	Pass	Fail	Pass	Fail	Fail	Fail	Fail	Fail	Fail	Fail	Fail	Fail	Pass	Pass	Ixodes ricinus
DK	DK-000	17	Fail	Fail	Fail	Fail	Fail	Fail	Fail	Fail	Fail	Fail	Fail	Fail	Fail	Fail	Fail	Ixodes ricinus
DK	DK-000	18	Fail	Pass	Pass	Fail	Pass	Fail	Pass	Fail	Fail	Fail	Fail	Fail	Fail	Pass	Pass	Ixodes ricinus
DK	DK-000	19	Fail	Pass	Fail	Pass	Fail	Fail	Fail	Fail	Fail	Fail	Fail	Fail	Fail	Fail	Fail	Ixodes ricinus
DK	DK-000	20	Fail	Pass	Pass	Fail	Fail	Fail	Fail	Fail	Fail	Fail	Fail	Fail	Fail	Fail	Fail	Ixodes ricinus
DK	DK-000	21	Fail	Fail	Fail	Fail	Fail	Fail	Fail	Fail	Fail	Fail	Fail	Fail	Pass	Pass	Pass	Ixodes ricinus
DK	DK-000	22	Fail	Fail	Fail	Fail	Fail	Fail	Fail	Fail	Fail	Fail	Fail	Fail	Fail	Fail	Fail	Ixodes ricinus
DK	DK-000	23	Fail	Pass	Pass	Fail	Fail	Fail	Fail	Fail	Fail	Fail	Fail	Fail	Fail	Pass	Pass	Ixodes ricinus
DK	DK-000	24	Pass	Pass	Pass	Fail	Fail	Fail	Fail	Fail	Fail	Fail	Fail	Fail	Fail	Fail	Fail	Ixodes ricinus
DK	DK-000	25	Fail	Fail	Fail	Fail	Fail	Fail	Fail	Fail	Fail	Fail	Fail	Fail	Fail	Pass	Pass	Ixodes ricinus
DK	DK-000	26	Fail	Fail	Fail	Fail	Fail	Fail	Fail	Fail	Fail	Fail	Fail	Fail	Fail	Fail	Fail	Ixodes ricinus
DK	DK-000	27	Fail	Pass	Pass	Pass	Pass	Fail	Fail	Pass	Fail	Fail	Fail	Pass	Fail	Fail	Fail	Ixodes ricinus
DK	DK-000	28	Fail	Fail	Fail	Fail	Fail	Fail	Fail	Fail	Fail	Fail	Fail	Fail	Fail	Fail	Fail	Ixodes ricinus
DK	DK-000	29	Fail	Pass	Pass	Fail	Fail	Fail	Fail	Fail	Fail	Fail	Fail	Fail	Fail	Pass	Pass	Ixodes ricinus
DK	DK-000	30	Fail	Fail	Fail	Fail	Fail	Fail	Fail	Fail	Fail	Fail	Fail	Fail	Fail	Fail	Fail	Ixodes ricinus
DK	DK-000	31	Fail	Fail	Fail	Fail	Fail	Fail	Fail	Fail	Fail	Fail	Fail	Fail	Fail	Fail	Fail	Ixodes ricinus
DK	DK-000	32	Fail	Pass	Pass	Pass	Fail	Fail	Fail	Fail	Fail	Fail	Fail	Fail	Fail	Fail	Fail	Ixodes ricinus
DK	DK-000	33	Fail	Pass	Fail	Fail	Fail	Fail	Fail	Fail	Fail	Fail	Fail	Fail	Fail	Fail	Fail	Ixodes ricinus
DK	DK-000	34	Fail	Pass	Fail	Pass	Fail	Fail	Fail	Fail	Fail	Fail	Fail	Fail	Fail	Fail	Fail	Ixodes ricinus
DK	DK-000	35	Fail	Pass	Fail	Fail	Pass	Fail	Pass	Fail	Fail	Fail	Fail	Fail	Fail	Pass	Pass	Ixodes ricinus
DK	DK-000	36	Fail	Fail	Fail	Fail	Fail	Fail	Fail	Fail	Fail	Fail	Fail	Fail	Fail	Fail	Fail	Ixodes ricinus
DK	DK-000	37	Fail	Fail	Fail	Fail	Fail	Fail	Fail	Fail	Fail	Fail	Fail	Fail	Fail	Fail	Fail	Ixodes ricinus
DK	DK-000	38	Fail	Fail	Fail	Fail	Fail	Fail	Fail	Fail	Fail	Fail	Fail	Fail	Fail	Fail	Fail	Ixodes ricinus
DK	DK-000	39	Fail	Fail	Fail	Fail	Fail	Fail	Fail	Fail	Fail	Fail	Fail	Fail	Fail	Pass	Pass	Ixodes ricinus
DK	DK-000	40	Fail	Fail	Fail	Fail	Fail	Fail	Fail	Fail	Fail	Fail	Fail	Fail	Fail	Fail	Fail	Ixodes ricinus
DK	DK-000	41	Pass	Pass	Fail	Fail	Fail	Fail	Fail	Fail	Fail	Fail	Fail	Fail	Fail	Fail	Fail	Ixodes ricinus
DK	DK-000	42	Fail	Pass	Pass	Fail	Fail	Fail	Fail	Fail	Fail	Fail	Fail	Fail	Fail	Fail	Fail	Ixodes ricinus
DK	DK-000	43	Fail	Fail	Fail	Fail	Fail	Fail	Fail	Fail	Fail	Fail	Fail	Fail	Fail	Fail	Fail	Ixodes ricinus
DK	DK-000	44	Fail	Fail	Fail	Fail	Fail	Fail	Fail	Fail	Fail	Fail	Fail	Fail	Pass	Fail	Fail	Ixodes ricinus
DK	DK-000	45	Fail	Fail	Fail	Fail	Fail	Fail	Fail	Fail	Fail	Fail	Fail	Fail	Fail	Fail	Fail	Ixodes ricinus
DK	DK-000	46	Fail	Fail	Fail	Fail	Fail	Fail	Fail	Fail	Fail	Fail	Fail	Fail	Fail	Pass	Pass	Ixodes ricinus
DK	DK-000	47	Fail	Pass	Fail	Fail	Pass	Fail	Fail	Fail	Fail	Fail	Fail	Fail	Fail	Pass	Pass	Ixodes ricinus
DK	DK-000	48	Fail	Pass	Fail	Fail	Fail	Fail	Fail	Pass	Fail	Fail	Fail	Fail	Fail	Fail	Fail	Ixodes ricinus
DK	DK-000	49	Fail	Fail	Fail	Fail	Fail	Fail	Fail	Fail	Fail	Fail	Fail	Fail	Fail	Pass	Pass	Ixodes ricinus
DK	DK-000	50	Fail	Pass	Pass	Fail	Fail	Fail	Fail	Fail	Fail	Fail	Fail	Fail	Fail	Fail	Fail	Ixodes ricinus
DK	DK-000	51	Fail	Fail	Fail	Fail	Fail	Fail	Fail	Fail	Fail	Fail	Fail	Fail	Fail	Fail	Fail	Ixodes ricinus
DK	DK-000	52	Fail	Fail	Fail	Fail	Fail	Fail	Fail	Fail	Fail	Fail	Fail	Fail	Fail	Pass	Pass	Ixodes ricinus
DK	DK-000	53	Fail	Pass	Pass	Fail	Fail	Fail	Fail	Fail	Fail	Fail	Fail	Fail	Fail	Fail	Fail	Ixodes ricinus
DK	DK-000	54	Fail	Pass	Pass	Fail	Pass	Fail	Fail	Fail	Fail	Fail	Fail	Fail	Pass	Fail	Fail	Ixodes ricinus
DK	DK-000	55	Fail	Fail	Fail	Fail	Fail	Fail	Fail	Fail	Fail	Fail	Fail	Fail	Fail	Pass	Pass	Ixodes ricinus
DK	DK-000	56	Fail	Fail	Fail	Fail	Fail	Fail	Fail	Fail	Fail	Fail	Fail	Pass	Fail	Pass	Pass	Ixodes ricinus
DK	DK-000	57	Fail	Fail	Fail	Fail	Fail	Fail	Fail	Fail	Fail	Fail	Fail	Fail	Fail	Fail	Fail	Ixodes ricinus
DK	DK-000	58	Fail	Fail	Fail	Fail	Fail	Fail	Fail	Fail	Fail	Fail	Fail	Fail	Fail	Fail	Fail	Ixodes ricinus
DK	DK-000	59	Fail	Fail	Fail	Fail	Fail	Fail	Fail	Fail	Fail	Fail	Fail	Fail	Fail	Fail	Fail	Ixodes ricinus
DK	DK-000	60	Fail	Fail	Fail	Fail	Fail	Fail	Fail	Fail	Fail	Fail	Fail	Fail	Fail	Pass	Pass	Ixodes ricinus
DK	DK-001	1	Fail	Pass	Fail	Pass	Pass	Fail	Pass	Fail	Fail	Fail	Fail	Fail	Fail	Fail	Fail	Ixodes ricinus
DK	DK-001	2	Fail	Pass	Pass	Pass	Pass	Fail	Pass	Fail	Pass	Fail	Fail	Pass	Pass	Fail	Fail	Ixodes ricinus
DK	DK-001	3	Fail	Pass	Fail	Fail	Pass	Fail	Fail	Pass	Fail	Fail	Fail	Pass	Fail	Pass	Pass	Ixodes ricinus
DK	DK-001	4	Fail	Pass	Pass	Fail	Pass	Fail	Pass	Fail	Fail	Fail	Fail	Fail	Fail	Fail	Fail	Ixodes ricinus
DK	DK-001	5	Fail	Pass	Fail	Fail	Fail	Fail	Fail	Pass	Fail	Fail	Fail	Fail	Fail	Fail	Fail	Ixodes ricinus
DK	DK-001	6	Fail	Pass	Fail	Fail	Fail	Fail	Fail	Fail	Fail	Fail	Fail	Fail	Fail	Fail	Fail	Ixodes ricinus
DK	DK-001	7	Fail	Pass	Fail	Fail	Pass	Fail	Fail	Fail	Fail	Fail	Fail	Fail	Fail	Pass	Pass	Ixodes ricinus
DK	DK-001	8	Fail	Pass	Fail	Fail	Pass	Fail	Fail	Fail	Fail	Fail	Fail	Fail	Fail	Fail	Fail	Ixodes ricinus
DK	DK-001	9	Fail	Pass	Pass	Fail	Fail	Fail	Fail	Fail	Fail	Fail	Fail	Fail	Pass	Fail	Fail	Ixodes ricinus
DK	DK-001	10	Fail	Pass	Fail	Fail	Pass	Fail	Pass	Fail	Pass	Fail	Fail	Fail	Fail	Fail	Fail	Ixodes ricinus
DK	DK-001	11	Fail	Pass	Pass	Fail	Fail	Fail	Fail	Fail	Fail	Fail	Fail	Fail	Pass	Pass	Pass	Ixodes ricinus
DK	DK-001	12	Fail	Pass	Fail	Fail	Pass	Fail	Fail	Fail	Fail	Fail	Fail	Fail	Fail	Pass	Pass	Ixodes ricinus
DK	DK-001	13	Fail	Pass	Pass	Pass	Pass	Fail	Pass	Fail	Fail	Fail	Fail	Fail	Fail	Fail	Fail	Ixodes ricinus
DK	DK-001	14	Fail	Fail	Fail	Fail	Fail	Fail	Fail	Fail	Fail	Fail	Fail	Fail	Fail	Fail	Fail	Ixodes ricinus
DK	DK-001	15	Fail	Pass	Pass	Fail	Pass	Fail	Fail	Pass	Fail	Fail	Fail	Fail	Fail	Pass	Pass	Ixodes ricinus
DK	DK-001	16	Fail	Pass	Fail	Pass	Fail	Fail	Fail	Fail	Pass	Fail	Fail	Fail	Fail	Pass	Pass	Ixodes ricinus
DK	DK-001	17	Fail	Pass	Pass	Fail	Pass	Fail	Fail	Fail	Fail	Fail	Fail	Fail	Fail	Fail	Fail	Ixodes ricinus
DK	DK-001	18	Fail	Pass	Pass	Fail	Pass	Fail	Fail	Pass	Fail	Fail	Fail	Fail	Fail	Pass	Pass	Ixodes ricinus
DK	DK-001	19	Fail	Pass	Fail	Fail	Fail	Fail	Fail	Fail	Fail	Fail	Fail	Fail	Fail	Fail	Fail	Ixodes ricinus
DK	DK-001	20	Fail	Pass	Fail	Fail	Pass	Fail	Fail	Pass	Fail	Fail	Fail	Pass	Fail	Fail	Fail	Ixodes ricinus
DK	DK-001	21	Fail	Fail	Fail	Fail	Fail	Fail	Fail	Fail	Pass	Fail	Fail	Fail	Fail	Fail	Fail	Ixodes ricinus
DK	DK-001	22	Fail	Pass	Fail	Fail	Pass	Fail	Pass	Fail	Fail	Fail	Fail	Fail	Fail	Fail	Fail	Ixodes ricinus
DK	DK-001	23	Fail	Pass	Pass	Fail	Pass	Fail	Fail	Fail	Fail	Fail	Fail	Fail	Fail	Fail	Fail	Ixodes ricinus
DK	DK-001	24	Fail	Pass	Fail	Pass	Pass	Fail	Fail	Pass	Fail	Fail	Fail	Fail	Fail	Pass	Pass	Ixodes ricinus
DK	DK-001	25	Fail	Pass	Fail	Pass	Pass	Fail	Pass	Fail	Fail	Fail	Fail	Fail	Fail	Fail	Fail	Ixodes ricinus
DK	DK-001	26	Fail	Pass	Pass	Pass	Pass	Fail	Fail	Fail	Fail	Fail	Fail	Fail	Fail	Pass	Pass	Ixodes ricinus
DK	DK-001	27	Fail	Pass	Pass	Fail	Pass	Fail	Pass	Fail	Fail	Fail	Fail	Fail	Fail	Pass	Pass	Ixodes ricinus
DK	DK-001	28	Pass	Pass	Fail	Fail	Fail	Fail	Fail	Fail	Fail	Fail	Fail	Fail	Fail	Fail	Fail	Ixodes ricinus
DK	DK-001	29	Fail	Pass	Fail	Fail	Fail	Fail	Fail	Pass	Fail	Fail	Fail	Fail	Fail	Fail	Fail	Ixodes ricinus
DK	DK-001	30	Fail	Pass	Fail	Fail	Pass	Fail	Pass	Fail	Fail	Fail	Fail	Fail	Fail	Fail	Fail	Ixodes ricinus
DK	DK-001	31	Pass	Pass	Pass	Fail	Fail	Fail	Fail	Fail	Pass	Fail	Fail	Fail	Fail	Fail	Fail	Ixodes ricinus
DK	DK-001	32	Fail	Pass	Pass	Fail	Pass	Fail	Fail	Pass	Pass	Fail	Fail	Fail	Fail	Fail	Fail	Ixodes ricinus
DK	DK-001	33	Pass	Pass	Fail	Fail	Fail	Fail	Fail	Pass	Fail	Fail	Fail	Fail	Fail	Fail	Fail	Ixodes ricinus
DK	DK-001	34	Fail	Fail	Fail	Fail	Fail	Fail	Fail	Fail	Fail	Fail	Fail	Fail	Fail	Fail	Fail	Ixodes ricinus
DK	DK-001	35	Fail	Pass	Fail	Fail	Fail	Fail	Fail	Pass	Fail	Fail	Fail	Fail	Fail	Pass	Fail	Ixodes ricinus
DK	DK-001	36	Fail	Fail	Fail	Fail	Fail	Fail	Fail	Fail	Fail	Fail	Fail	Fail	Fail	Fail	Fail	Ixodes ricinus
DK	DK-001	37	Fail	Pass	Fail	Fail	Pass	Fail	Fail	Fail	Fail	Fail	Fail	Fail	Fail	Fail	Fail	Ixodes ricinus
DK	DK-001	38	Fail	Pass	Pass	Fail	Fail	Fail	Fail	Fail	Pass	Fail	Fail	Fail	Fail	Fail	Fail	Ixodes ricinus
DK	DK-001	39	Fail	Pass	Fail	Pass	Fail	Fail	Fail	Fail	Fail	Fail	Fail	Fail	Fail	Pass	Pass	Ixodes ricinus
DK	DK-001	40	Pass	Pass	Fail	Fail	Pass	Fail	Fail	Fail	Pass	Fail	Fail	Fail	Fail	Pass	Pass	Ixodes ricinus
DK	DK-001	41	Fail	Pass	Fail	Fail	Fail	Fail	Fail	Pass	Pass	Fail	Fail	Fail	Fail	Fail	Fail	Ixodes ricinus
DK	DK-001	42	Fail	Pass	Pass	Fail	Fail	Fail	Fail	Fail	Fail	Fail	Fail	Fail	Fail	Fail	Fail	Ixodes ricinus
DK	DK-001	43	Fail	Pass	Pass	Fail	Pass	Fail	Fail	Fail	Pass	Fail	Fail	Fail	Fail	Fail	Fail	Ixodes ricinus
DK	DK-001	44	Fail	Pass	Fail	Pass	Fail	Fail	Fail	Fail	Pass	Fail	Fail	Fail	Fail	Fail	Fail	Ixodes ricinus
DK	DK-001	45	Fail	Pass	Fail	Fail	Pass	Fail	Pass	Fail	Pass	Fail	Fail	Fail	Fail	Fail	Fail	Ixodes ricinus
DK	DK-001	46	Fail	Pass	Pass	Fail	Pass	Fail	Pass	Fail	Fail	Fail	Fail	Fail	Fail	Pass	Pass	Ixodes ricinus
DK	DK-001	47	Fail	Pass	Fail	Fail	Pass	Fail	Pass	Fail	Fail	Fail	Fail	Pass	Fail	Pass	Pass	Ixodes ricinus
DK	DK-001	48	Fail	Pass	Fail	Fail	Pass	Fail	Pass	Pass	Pass	Fail	Fail	Fail	Fail	Pass	Pass	Ixodes ricinus
DK	DK-001	49	Fail	Pass	Fail	Fail	Pass	Fail	Fail	Pass	Pass	Fail	Fail	Fail	Fail	Fail	Fail	Ixodes ricinus
DK	DK-001	50	Fail	Pass	Fail	Fail	Pass	Fail	Fail	Pass	Fail	Fail	Fail	Fail	Fail	Pass	Pass	Ixodes ricinus
DK	DK-001	51	Fail	Pass	Fail	Fail	Pass	Fail	Pass	Fail	Fail	Fail	Fail	Fail	Fail	Fail	Fail	Ixodes ricinus
DK	DK-001	52	Fail	Pass	Fail	Fail	Pass	Fail	Fail	Fail	Fail	Fail	Fail	Fail	Fail	Pass	Pass	Ixodes ricinus
DK	DK-001	53	Fail	Pass	Fail	Fail	Fail	Fail	Fail	Fail	Fail	Fail	Fail	Fail	Fail	Pass	Pass	Ixodes ricinus
DK	DK-001	54	Fail	Pass	Fail	Fail	Pass	Fail	Fail	Fail	Fail	Fail	Fail	Fail	Fail	Pass	Pass	Ixodes ricinus
DK	DK-001	55	Fail	Pass	Pass	Fail	Pass	Fail	Fail	Fail	Fail	Fail	Fail	Fail	Pass	Pass	Pass	Ixodes ricinus
DK	DK-001	56	Fail	Pass	Pass	Fail	Pass	Fail	Pass	Pass	Fail	Fail	Fail	Fail	Fail	Fail	Fail	Ixodes ricinus
DK	DK-001	57	Fail	Pass	Fail	Pass	Fail	Fail	Fail	Fail	Pass	Fail	Fail	Fail	Fail	Pass	Pass	Ixodes ricinus
DK	DK-001	58	Fail	Pass	Pass	Fail	Pass	Fail	Pass	Fail	Fail	Fail	Fail	Fail	Fail	Fail	Fail	Ixodes ricinus
DK	DK-001	59	Fail	Fail	Fail	Fail	Fail	Fail	Fail	Fail	Fail	Fail	Fail	Fail	Fail	Pass	Pass	Ixodes ricinus
DK	DK-001	60	Pass	Pass	Fail	Fail	Pass	Fail	Fail	Pass	Fail	Fail	Fail	Fail	Fail	Fail	Fail	Ixodes ricinus
DK	DK-002	1	Fail	Pass	Fail	Fail	Pass	Fail	Pass	Fail	Fail	Fail	Fail	Fail	Fail	Pass	Pass	Ixodes ricinus
DK	DK-002	2	Fail	Pass	Fail	Fail	Pass	Fail	Fail	Fail	Fail	Fail	Fail	Fail	Fail	Pass	Pass	Ixodes ricinus
DK	DK-002	3	Fail	Pass	Fail	Fail	Pass	Fail	Pass	Fail	Fail	Fail	Fail	Fail	Fail	Fail	Fail	Ixodes ricinus
DK	DK-002	4	Fail	Pass	Pass	Fail	Fail	Fail	Fail	Fail	Fail	Fail	Fail	Fail	Fail	Pass	Pass	Ixodes ricinus
DK	DK-002	5	Fail	Pass	Pass	Fail	Fail	Fail	Fail	Fail	Fail	Fail	Fail	Fail	Fail	Fail	Fail	Ixodes ricinus
DK	DK-002	6	Fail	Fail	Fail	Fail	Fail	Fail	Fail	Fail	Pass	Fail	Fail	Fail	Pass	Pass	Pass	Ixodes ricinus
DK	DK-002	7	Fail	Pass	Pass	Fail	Fail	Fail	Fail	Fail	Fail	Fail	Fail	Fail	Pass	Pass	Pass	Ixodes ricinus
DK	DK-002	8	Fail	Fail	Fail	Fail	Fail	Fail	Fail	Fail	Fail	Fail	Fail	Fail	Fail	Fail	Fail	Ixodes ricinus
DK	DK-002	9	Fail	Fail	Fail	Fail	Fail	Fail	Fail	Fail	Fail	Fail	Fail	Fail	Fail	Pass	Pass	Ixodes ricinus
DK	DK-002	10	Fail	Pass	Fail	Fail	Pass	Fail	Fail	Pass	Fail	Fail	Fail	Fail	Fail	Pass	Pass	Ixodes ricinus
DK	DK-002	11	Fail	Pass	Pass	Pass	Fail	Fail	Fail	Fail	Pass	Fail	Fail	Fail	Fail	Pass	Pass	Ixodes ricinus
DK	DK-002	12	Fail	Pass	Fail	Fail	Pass	Fail	Pass	Fail	Fail	Fail	Fail	Fail	Fail	Fail	Fail	Ixodes ricinus
DK	DK-002	13	Fail	Pass	Pass	Fail	Pass	Fail	Pass	Fail	Fail	Fail	Fail	Fail	Fail	Fail	Fail	Ixodes ricinus
DK	DK-002	14	Fail	Pass	Fail	Pass	Fail	Fail	Fail	Fail	Fail	Fail	Fail	Fail	Fail	Pass	Fail	Ixodes ricinus
DK	DK-002	15	Fail	Pass	Pass	Fail	Pass	Fail	Pass	Pass	Pass	Fail	Fail	Fail	Fail	Fail	Fail	Ixodes ricinus
DK	DK-002	16	Fail	Pass	Fail	Fail	Pass	Fail	Pass	Fail	Fail	Fail	Fail	Fail	Fail	Pass	Pass	Ixodes ricinus
DK	DK-002	17	Fail	Pass	Pass	Fail	Pass	Fail	Fail	Fail	Fail	Fail	Fail	Fail	Fail	Fail	Fail	Ixodes ricinus
DK	DK-002	18	Fail	Pass	Fail	Fail	Pass	Fail	Pass	Pass	Fail	Fail	Fail	Fail	Fail	Pass	Pass	Ixodes ricinus
DK	DK-002	19	Fail	Pass	Pass	Fail	Pass	Fail	Pass	Fail	Fail	Fail	Fail	Fail	Fail	Pass	Pass	Ixodes ricinus
DK	DK-002	20	Pass	Pass	Pass	Fail	Pass	Fail	Pass	Fail	Fail	Fail	Fail	Fail	Fail	Fail	Fail	Ixodes ricinus
DK	DK-002	21	Fail	Pass	Fail	Fail	Pass	Fail	Fail	Pass	Fail	Fail	Fail	Fail	Fail	Fail	Fail	Ixodes ricinus
DK	DK-002	22	Fail	Pass	Fail	Fail	Pass	Fail	Fail	Pass	Pass	Fail	Fail	Fail	Fail	Pass	Pass	Ixodes ricinus
DK	DK-002	23	Fail	Pass	Fail	Fail	Fail	Fail	Fail	Fail	Pass	Fail	Fail	Fail	Fail	Fail	Fail	Ixodes ricinus
DK	DK-002	24	Fail	Pass	Fail	Fail	Pass	Fail	Fail	Fail	Fail	Fail	Fail	Fail	Fail	Fail	Fail	Ixodes ricinus
DK	DK-002	25	Fail	Pass	Pass	Pass	Pass	Fail	Fail	Fail	Fail	Fail	Fail	Fail	Fail	Fail	Fail	Ixodes ricinus
DK	DK-002	26	Fail	Pass	Fail	Fail	Pass	Fail	Pass	Fail	Fail	Fail	Fail	Fail	Fail	Pass	Pass	Ixodes ricinus
DK	DK-002	27	Fail	Pass	Fail	Fail	Pass	Fail	Fail	Pass	Fail	Fail	Fail	Fail	Fail	Pass	Pass	Ixodes ricinus
DK	DK-002	28	Fail	Pass	Fail	Pass	Fail	Fail	Fail	Fail	Fail	Fail	Fail	Fail	Fail	Pass	Pass	Ixodes ricinus
DK	DK-002	29	Fail	Fail	Fail	Fail	Fail	Fail	Fail	Fail	Fail	Fail	Fail	Fail	Fail	Fail	Fail	Ixodes ricinus
DK	DK-002	30	Fail	Pass	Fail	Fail	Pass	Fail	Fail	Fail	Fail	Fail	Fail	Fail	Fail	Fail	Fail	Ixodes ricinus
DK	DK-002	31	Fail	Pass	Fail	Pass	Pass	Fail	Fail	Pass	Fail	Fail	Fail	Fail	Fail	Pass	Pass	Ixodes ricinus
DK	DK-002	32	Fail	Pass	Pass	Fail	Pass	Fail	Fail	Pass	Fail	Fail	Fail	Pass	Fail	Pass	Fail	Ixodes ricinus
DK	DK-002	33	Fail	Pass	Fail	Fail	Pass	Fail	Fail	Fail	Fail	Fail	Fail	Fail	Fail	Pass	Pass	Ixodes ricinus
DK	DK-002	34	Fail	Fail	Fail	Fail	Fail	Fail	Fail	Fail	Fail	Fail	Fail	Fail	Fail	Pass	Pass	Ixodes ricinus
DK	DK-002	35	Fail	Fail	Fail	Fail	Fail	Fail	Fail	Fail	Fail	Fail	Fail	Fail	Fail	Pass	Pass	Ixodes ricinus
DK	DK-002	36	Fail	Pass	Pass	Fail	Fail	Fail	Fail	Fail	Fail	Fail	Fail	Fail	Pass	Pass	Fail	Ixodes ricinus
DK	DK-002	37	Fail	Pass	Fail	Pass	Pass	Fail	Fail	Fail	Fail	Fail	Fail	Fail	Fail	Pass	Pass	Ixodes ricinus
DK	DK-002	38	Fail	Pass	Fail	Fail	Pass	Fail	Pass	Fail	Fail	Fail	Fail	Fail	Fail	Fail	Fail	Ixodes ricinus
DK	DK-002	39	Fail	Pass	Fail	Fail	Pass	Fail	Pass	Fail	Fail	Fail	Fail	Fail	Fail	Pass	Pass	Ixodes ricinus
DK	DK-002	40	Fail	Pass	Fail	Fail	Pass	Fail	Fail	Pass	Fail	Fail	Fail	Fail	Fail	Pass	Pass	Ixodes ricinus
DK	DK-002	41	Fail	Fail	Fail	Fail	Fail	Fail	Fail	Fail	Fail	Fail	Fail	Fail	Fail	Pass	Pass	Ixodes ricinus
DK	DK-002	42	Fail	Pass	Pass	Pass	Fail	Fail	Fail	Pass	Fail	Fail	Fail	Fail	Fail	Fail	Fail	Ixodes ricinus
DK	DK-002	43	Fail	Pass	Fail	Pass	Pass	Fail	Pass	Fail	Fail	Fail	Fail	Fail	Fail	Pass	Pass	Ixodes ricinus
DK	DK-002	44	Fail	Fail	Fail	Fail	Fail	Fail	Fail	Fail	Fail	Fail	Fail	Fail	Fail	Pass	Pass	Ixodes ricinus
DK	DK-002	45	Fail	Pass	Fail	Fail	Pass	Fail	Fail	Pass	Fail	Pass	Fail	Fail	Fail	Pass	Pass	Ixodes ricinus
DK	DK-002	46	Fail	Pass	Fail	Fail	Pass	Fail	Pass	Fail	Fail	Fail	Fail	Pass	Fail	Fail	Fail	Ixodes ricinus
DK	DK-002	47	Fail	Pass	Pass	Fail	Pass	Fail	Fail	Fail	Pass	Fail	Fail	Fail	Fail	Pass	Pass	Ixodes ricinus
DK	DK-002	48	Fail	Pass	Fail	Fail	Pass	Fail	Fail	Fail	Fail	Fail	Fail	Fail	Fail	Pass	Pass	Ixodes ricinus
DK	DK-002	49	Fail	Pass	Fail	Fail	Pass	Fail	Fail	Fail	Fail	Fail	Fail	Fail	Fail	Pass	Pass	Ixodes ricinus
DK	DK-002	50	Fail	Fail	Fail	Fail	Fail	Fail	Fail	Fail	Fail	Fail	Fail	Fail	Fail	Fail	Fail	Ixodes ricinus
DK	DK-002	51	Fail	Pass	Fail	Fail	Pass	Fail	Pass	Fail	Fail	Fail	Fail	Fail	Fail	Pass	Pass	Ixodes ricinus
DK	DK-002	52	Fail	Pass	Pass	Fail	Pass	Fail	Pass	Fail	Fail	Fail	Fail	Fail	Fail	Fail	Fail	Ixodes ricinus
DK	DK-002	53	Fail	Pass	Fail	Fail	Pass	Fail	Fail	Pass	Fail	Fail	Fail	Fail	Fail	Pass	Pass	Ixodes ricinus
DK	DK-002	54	Fail	Pass	Fail	Pass	Pass	Fail	Pass	Pass	Fail	Fail	Fail	Fail	Pass	Fail	Fail	Ixodes ricinus
DK	DK-002	55	Fail	Pass	Fail	Fail	Pass	Fail	Fail	Fail	Fail	Fail	Fail	Fail	Fail	Fail	Fail	Ixodes ricinus
DK	DK-002	56	Fail	Pass	Fail	Fail	Pass	Fail	Fail	Pass	Fail	Fail	Fail	Fail	Fail	Pass	Pass	Ixodes ricinus
DK	DK-002	57	Fail	Pass	Fail	Fail	Pass	Fail	Fail	Fail	Pass	Fail	Fail	Fail	Fail	Pass	Pass	Ixodes ricinus
DK	DK-002	58	Fail	Fail	Fail	Fail	Fail	Fail	Fail	Fail	Fail	Fail	Fail	Fail	Fail	Fail	Pass	Ixodes ricinus
DK	DK-002	59	Fail	Pass	Fail	Fail	Pass	Fail	Fail	Pass	Pass	Fail	Fail	Fail	Fail	Pass	Pass	Ixodes ricinus
DK	DK-002	60	Fail	Pass	Pass	Fail	Pass	Fail	Pass	Fail	Fail	Fail	Fail	Fail	Fail	Fail	Fail	Ixodes ricinus
DK	DK-005	1	Fail	Fail	Fail	Fail	Fail	Fail	Fail	Fail	Fail	Fail	Fail	Fail	Fail	Pass	Pass	Ixodes ricinus
DK	DK-005	2	Fail	Pass	Pass	Fail	Pass	Fail	Fail	Pass	Fail	Fail	Fail	Fail	Fail	Fail	Fail	Ixodes ricinus
DK	DK-005	3	Fail	Fail	Fail	Fail	Fail	Fail	Fail	Fail	Fail	Fail	Fail	Fail	Fail	Fail	Fail	Ixodes ricinus
DK	DK-005	4	Fail	Pass	Fail	Fail	Pass	Fail	Fail	Fail	Fail	Fail	Fail	Fail	Pass	Fail	Fail	Ixodes ricinus
DK	DK-005	5	Fail	Pass	Fail	Fail	Fail	Fail	Fail	Pass	Fail	Fail	Fail	Fail	Pass	Pass	Pass	Ixodes ricinus
DK	DK-005	6	Fail	Pass	Pass	Fail	Fail	Fail	Fail	Fail	Pass	Fail	Fail	Fail	Fail	Fail	Fail	Ixodes ricinus
DK	DK-005	7	Fail	Fail	Fail	Fail	Fail	Fail	Fail	Fail	Fail	Fail	Fail	Pass	Fail	Pass	Pass	Ixodes ricinus
DK	DK-005	8	Fail	Pass	Fail	Fail	Pass	Fail	Fail	Pass	Fail	Fail	Fail	Fail	Fail	Fail	Fail	Ixodes ricinus
DK	DK-005	9	Fail	Pass	Pass	Pass	Fail	Fail	Fail	Fail	Fail	Fail	Fail	Fail	Pass	Pass	Pass	Ixodes ricinus
DK	DK-005	10	Fail	Fail	Fail	Fail	Fail	Fail	Fail	Fail	Fail	Fail	Fail	Fail	Fail	Fail	Fail	Ixodes ricinus
DK	DK-005	11	Fail	Fail	Fail	Fail	Fail	Fail	Fail	Fail	Pass	Fail	Fail	Fail	Fail	Fail	Fail	Ixodes ricinus
DK	DK-005	12	Fail	Fail	Fail	Fail	Fail	Fail	Fail	Fail	Fail	Fail	Fail	Fail	Fail	Fail	Fail	Ixodes ricinus
DK	DK-005	13	Fail	Fail	Fail	Fail	Fail	Fail	Fail	Fail	Fail	Fail	Fail	Fail	Fail	Fail	Fail	Ixodes ricinus
DK	DK-005	14	Fail	Fail	Fail	Fail	Fail	Fail	Fail	Fail	Fail	Fail	Fail	Fail	Fail	Pass	Pass	Ixodes ricinus
DK	DK-005	15	Fail	Fail	Fail	Fail	Fail	Fail	Fail	Fail	Fail	Fail	Fail	Fail	Fail	Fail	Fail	Ixodes ricinus
DK	DK-005	16	Fail	Fail	Fail	Fail	Fail	Fail	Fail	Fail	Fail	Fail	Fail	Fail	Fail	Fail	Fail	Ixodes ricinus
DK	DK-005	17	Fail	Fail	Fail	Fail	Fail	Fail	Fail	Fail	Fail	Fail	Fail	Fail	Fail	Pass	Pass	Ixodes ricinus
DK	DK-005	18	Fail	Pass	Pass	Fail	Fail	Fail	Fail	Fail	Fail	Fail	Fail	Fail	Fail	Fail	Fail	Ixodes ricinus
DK	DK-005	19	Fail	Pass	Fail	Fail	Pass	Fail	Fail	Fail	Fail	Fail	Fail	Fail	Fail	Pass	Pass	Ixodes ricinus
DK	DK-005	20	Fail	Fail	Fail	Fail	Fail	Fail	Fail	Fail	Fail	Fail	Fail	Fail	Fail	Fail	Fail	Ixodes ricinus
DK	DK-005	21	Fail	Pass	Pass	Fail	Pass	Fail	Fail	Pass	Pass	Fail	Fail	Fail	Fail	Fail	Fail	Ixodes ricinus
DK	DK-005	22	Fail	Pass	Fail	Fail	Pass	Fail	Fail	Fail	Fail	Fail	Fail	Fail	Pass	Pass	Pass	Ixodes ricinus
DK	DK-005	23	Fail	Pass	Fail	Fail	Fail	Fail	Fail	Fail	Fail	Fail	Fail	Fail	Fail	Pass	Pass	Ixodes ricinus
DK	DK-005	24	Fail	Pass	Fail	Fail	Pass	Fail	Fail	Fail	Fail	Fail	Fail	Fail	Fail	Pass	Pass	Ixodes ricinus
DK	DK-005	25	Fail	Pass	Fail	Fail	Pass	Fail	Fail	Pass	Fail	Fail	Fail	Fail	Fail	Pass	Pass	Ixodes ricinus
DK	DK-005	26	Fail	Pass	Pass	Fail	Pass	Fail	Pass	Fail	Pass	Fail	Fail	Pass	Fail	Fail	Fail	Ixodes ricinus
DK	DK-005	27	Fail	Fail	Fail	Fail	Fail	Fail	Fail	Fail	Fail	Fail	Fail	Fail	Fail	Pass	Pass	Ixodes ricinus
DK	DK-005	28	Fail	Fail	Fail	Fail	Fail	Fail	Fail	Fail	Fail	Fail	Fail	Fail	Fail	Fail	Fail	Ixodes ricinus
DK	DK-005	29	Fail	Pass	Fail	Fail	Pass	Fail	Fail	Pass	Fail	Fail	Fail	Fail	Fail	Fail	Fail	Ixodes ricinus
DK	DK-005	30	Fail	Pass	Pass	Fail	Pass	Fail	Fail	Pass	Fail	Fail	Fail	Fail	Pass	Fail	Fail	Ixodes ricinus
DK	DK-005	31	Fail	Fail	Fail	Fail	Fail	Fail	Fail	Fail	Pass	Fail	Fail	Fail	Fail	Fail	Fail	Ixodes ricinus
DK	DK-005	32	Fail	Pass	Pass	Fail	Fail	Fail	Fail	Fail	Pass	Fail	Fail	Fail	Fail	Pass	Pass	Ixodes ricinus
DK	DK-005	33	Fail	Pass	Fail	Fail	Pass	Fail	Pass	Fail	Fail	Fail	Fail	Fail	Fail	Pass	Pass	Ixodes ricinus
DK	DK-005	34	Fail	Pass	Fail	Fail	Pass	Fail	Fail	Pass	Fail	Fail	Fail	Fail	Fail	Pass	Pass	Ixodes ricinus
DK	DK-005	35	Fail	Pass	Fail	Fail	Pass	Fail	Fail	Pass	Fail	Fail	Fail	Fail	Fail	Pass	Pass	Ixodes ricinus
DK	DK-005	36	Fail	Pass	Fail	Fail	Pass	Fail	Fail	Pass	Fail	Fail	Fail	Fail	Fail	Fail	Pass	Ixodes ricinus
DK	DK-005	37	Fail	Pass	Fail	Fail	Pass	Fail	Pass	Fail	Fail	Fail	Fail	Fail	Fail	Fail	Fail	Ixodes ricinus
DK	DK-005	38	Fail	Fail	Fail	Fail	Fail	Fail	Fail	Pass	Fail	Fail	Fail	Fail	Fail	Fail	Fail	Ixodes ricinus
DK	DK-005	39	Fail	Pass	Fail	Fail	Fail	Fail	Fail	Fail	Pass	Fail	Fail	Fail	Pass	Fail	Fail	Ixodes ricinus
DK	DK-005	40	Fail	Pass	Pass	Fail	Pass	Fail	Pass	Fail	Fail	Fail	Fail	Fail	Fail	Fail	Fail	Ixodes ricinus
DK	DK-005	41	Fail	Pass	Fail	Fail	Pass	Fail	Pass	Fail	Fail	Fail	Fail	Fail	Fail	Pass	Fail	Ixodes ricinus
DK	DK-005	42	Fail	Pass	Fail	Fail	Pass	Fail	Pass	Pass	Fail	Fail	Fail	Fail	Fail	Fail	Fail	Ixodes ricinus
DK	DK-005	43	Fail	Pass	Pass	Pass	Fail	Fail	Fail	Pass	Pass	Fail	Fail	Fail	Fail	Pass	Pass	Ixodes ricinus
DK	DK-005	44	Fail	Pass	Fail	Fail	Fail	Fail	Fail	Fail	Fail	Fail	Fail	Fail	Fail	Fail	Fail	Ixodes ricinus
DK	DK-005	45	Fail	Pass	Pass	Pass	Fail	Fail	Fail	Fail	Fail	Fail	Fail	Fail	Fail	Pass	Pass	Ixodes ricinus
DK	DK-005	46	Fail	Fail	Fail	Fail	Fail	Fail	Fail	Fail	Fail	Fail	Fail	Fail	Fail	Fail	Fail	Ixodes ricinus
DK	DK-005	47	Fail	Pass	Pass	Fail	Fail	Fail	Fail	Fail	Fail	Fail	Fail	Fail	Pass	Fail	Fail	Ixodes ricinus
DK	DK-005	48	Fail	Pass	Fail	Pass	Pass	Fail	Fail	Fail	Fail	Fail	Fail	Fail	Fail	Fail	Fail	Ixodes ricinus
DK	DK-005	49	Fail	Pass	Fail	Fail	Pass	Fail	Pass	Fail	Fail	Fail	Fail	Fail	Fail	Pass	Pass	Ixodes ricinus
DK	DK-005	50	Fail	Pass	Fail	Fail	Pass	Fail	Pass	Fail	Fail	Fail	Fail	Fail	Pass	Pass	Pass	Ixodes ricinus
DK	DK-005	51	Fail	Pass	Pass	Fail	Fail	Fail	Fail	Pass	Pass	Fail	Fail	Fail	Fail	Pass	Pass	Ixodes ricinus
DK	DK-005	52	Fail	Pass	Fail	Pass	Fail	Fail	Fail	Fail	Pass	Fail	Fail	Fail	Fail	Pass	Pass	Ixodes ricinus
DK	DK-005	53	Fail	Pass	Fail	Fail	Pass	Fail	Fail	Fail	Pass	Fail	Fail	Fail	Pass	Fail	Fail	Ixodes ricinus
DK	DK-005	54	Fail	Pass	Pass	Fail	Fail	Fail	Fail	Fail	Pass	Fail	Fail	Fail	Fail	Fail	Fail	Ixodes ricinus
DK	DK-005	55	Fail	Pass	Fail	Fail	Fail	Fail	Fail	Fail	Pass	Fail	Fail	Fail	Fail	Fail	Fail	Ixodes ricinus
DK	DK-005	56	Fail	Pass	Fail	Pass	Pass	Fail	Fail	Pass	Fail	Fail	Fail	Fail	Fail	Fail	Fail	Ixodes ricinus
DK	DK-005	57	Fail	Pass	Pass	Fail	Fail	Fail	Fail	Fail	Pass	Fail	Fail	Pass	Fail	Pass	Pass	Ixodes ricinus
DK	DK-005	58	Fail	Fail	Fail	Fail	Fail	Fail	Fail	Fail	Fail	Fail	Fail	Fail	Fail	Pass	Pass	Ixodes ricinus
DK	DK-005	59	Fail	Fail	Fail	Fail	Fail	Fail	Fail	Fail	Fail	Fail	Fail	Fail	Fail	Pass	Pass	Ixodes ricinus
DK	DK-005	60	Fail	Pass	Fail	Fail	Pass	Fail	Fail	Fail	Fail	Fail	Fail	Fail	Fail	Pass	Pass	Ixodes ricinus
DK	DK-010	1	Fail	Pass	Fail	Fail	Pass	Fail	Fail	Fail	Pass	Fail	Fail	Fail	Fail	Fail	Fail	Ixodes ricinus
DK	DK-010	2	Pass	Pass	Fail	Fail	Fail	Fail	Fail	Fail	Fail	Fail	Fail	Fail	Fail	Fail	Fail	Ixodes ricinus
DK	DK-010	3	Fail	Pass	Pass	Fail	Pass	Fail	Fail	Fail	Fail	Fail	Fail	Pass	Pass	Pass	Pass	Ixodes ricinus
DK	DK-010	4	Fail	Fail	Fail	Fail	Fail	Fail	Fail	Fail	Fail	Fail	Fail	Fail	Fail	Fail	Fail	Ixodes ricinus
DK	DK-010	5	Fail	Pass	Pass	Fail	Fail	Fail	Fail	Fail	Fail	Fail	Fail	Fail	Fail	Fail	Fail	Ixodes ricinus
DK	DK-010	6	Fail	Pass	Pass	Fail	Fail	Fail	Fail	Fail	Fail	Fail	Fail	Fail	Fail	Fail	Fail	Ixodes ricinus
DK	DK-010	7	Fail	Pass	Pass	Fail	Fail	Fail	Fail	Fail	Pass	Fail	Fail	Fail	Fail	Fail	Fail	Ixodes ricinus
DK	DK-010	8	Fail	Pass	Pass	Fail	Fail	Fail	Fail	Fail	Fail	Fail	Fail	Fail	Pass	Pass	Pass	Ixodes ricinus
DK	DK-010	9	Fail	Pass	Pass	Fail	Pass	Fail	Pass	Fail	Fail	Fail	Fail	Fail	Fail	Fail	Fail	Ixodes ricinus
DK	DK-010	10	Fail	Fail	Fail	Fail	Fail	Fail	Fail	Fail	Pass	Fail	Fail	Fail	Fail	Pass	Pass	Ixodes ricinus
DK	DK-010	11	Fail	Fail	Fail	Fail	Fail	Fail	Fail	Fail	Fail	Fail	Fail	Fail	Fail	Pass	Pass	Ixodes ricinus
DK	DK-010	12	Fail	Fail	Fail	Fail	Fail	Fail	Fail	Fail	Fail	Fail	Fail	Fail	Fail	Pass	Pass	Ixodes ricinus
DK	DK-010	13	Fail	Pass	Pass	Fail	Fail	Fail	Fail	Fail	Fail	Fail	Fail	Fail	Fail	Pass	Pass	Ixodes ricinus
DK	DK-010	14	Fail	Fail	Fail	Fail	Fail	Fail	Fail	Fail	Pass	Fail	Fail	Fail	Fail	Fail	Fail	Ixodes ricinus
DK	DK-010	15	Fail	Pass	Pass	Fail	Fail	Fail	Fail	Fail	Fail	Fail	Fail	Fail	Pass	Pass	Pass	Ixodes ricinus
DK	DK-010	16	Fail	Fail	Fail	Fail	Fail	Fail	Fail	Fail	Fail	Fail	Fail	Fail	Pass	Fail	Fail	Ixodes ricinus
DK	DK-010	17	Fail	Pass	Fail	Fail	Fail	Fail	Fail	Fail	Fail	Fail	Fail	Fail	Fail	Fail	Fail	Ixodes ricinus
DK	DK-010	18	Fail	Pass	Pass	Fail	Pass	Fail	Fail	Fail	Fail	Fail	Fail	Fail	Fail	Pass	Pass	Ixodes ricinus
DK	DK-010	19	Fail	Pass	Fail	Fail	Pass	Fail	Pass	Pass	Fail	Fail	Fail	Fail	Fail	Pass	Pass	Ixodes ricinus
DK	DK-010	20	Fail	Fail	Fail	Fail	Fail	Fail	Fail	Fail	Fail	Fail	Fail	Fail	Fail	Fail	Pass	Ixodes ricinus
DK	DK-010	21	Fail	Fail	Fail	Fail	Fail	Fail	Fail	Fail	Fail	Pass	Fail	Fail	Fail	Pass	Pass	Ixodes ricinus
DK	DK-010	22	Fail	Fail	Fail	Fail	Fail	Fail	Fail	Fail	Pass	Fail	Fail	Fail	Fail	Pass	Pass	Ixodes ricinus
DK	DK-010	23	Fail	Pass	Fail	Fail	Fail	Fail	Fail	Pass	Fail	Fail	Fail	Fail	Pass	Fail	Fail	Ixodes ricinus
DK	DK-010	24	Pass	Pass	Fail	Fail	Pass	Fail	Fail	Fail	Pass	Fail	Fail	Fail	Fail	Fail	Fail	Ixodes ricinus
DK	DK-010	25	Fail	Pass	Pass	Fail	Fail	Fail	Fail	Fail	Pass	Fail	Fail	Fail	Fail	Pass	Pass	Ixodes ricinus
DK	DK-010	26	Fail	Pass	Pass	Fail	Fail	Fail	Fail	Fail	Fail	Fail	Fail	Fail	Fail	Pass	Pass	Ixodes ricinus
DK	DK-010	27	Fail	Fail	Fail	Fail	Fail	Fail	Fail	Fail	Fail	Fail	Fail	Fail	Pass	Pass	Pass	Ixodes ricinus
DK	DK-010	28	Fail	Pass	Pass	Fail	Pass	Fail	Fail	Fail	Pass	Fail	Fail	Fail	Fail	Pass	Pass	Ixodes ricinus
DK	DK-010	29	Fail	Fail	Fail	Fail	Fail	Fail	Fail	Fail	Fail	Fail	Fail	Fail	Fail	Fail	Fail	Ixodes ricinus
DK	DK-010	30	Fail	Pass	Pass	Fail	Pass	Fail	Fail	Fail	Pass	Fail	Fail	Fail	Fail	Fail	Fail	Ixodes ricinus
DK	DK-010	31	Fail	Pass	Pass	Fail	Fail	Fail	Fail	Fail	Fail	Fail	Fail	Fail	Pass	Pass	Pass	Ixodes ricinus
DK	DK-010	32	Fail	Fail	Fail	Fail	Fail	Fail	Fail	Fail	Pass	Fail	Fail	Fail	Fail	Fail	Fail	Ixodes ricinus
DK	DK-010	33	Pass	Pass	Fail	Fail	Fail	Fail	Fail	Fail	Fail	Fail	Fail	Fail	Fail	Fail	Fail	Ixodes ricinus
DK	DK-010	34	Fail	Fail	Fail	Fail	Fail	Fail	Fail	Fail	Pass	Fail	Fail	Fail	Fail	Fail	Fail	Ixodes ricinus
DK	DK-010	35	Fail	Pass	Pass	Fail	Fail	Fail	Fail	Fail	Fail	Fail	Fail	Fail	Fail	Pass	Pass	Ixodes ricinus
DK	DK-010	36	Fail	Fail	Fail	Fail	Fail	Fail	Fail	Fail	Pass	Fail	Fail	Fail	Fail	Fail	Fail	Ixodes ricinus
DK	DK-010	37	Fail	Fail	Fail	Fail	Fail	Fail	Fail	Fail	Fail	Fail	Fail	Fail	Fail	Fail	Fail	Ixodes ricinus
DK	DK-010	38	Fail	Fail	Fail	Fail	Fail	Fail	Fail	Fail	Fail	Fail	Fail	Fail	Fail	Pass	Pass	Ixodes ricinus
DK	DK-010	39	Fail	Pass	Pass	Fail	Fail	Fail	Fail	Fail	Fail	Fail	Fail	Fail	Fail	Fail	Fail	Ixodes ricinus
DK	DK-010	40	Fail	Fail	Fail	Fail	Fail	Fail	Fail	Fail	Fail	Fail	Fail	Fail	Fail	Fail	Fail	Ixodes ricinus
DK	DK-010	41	Fail	Pass	Pass	Pass	Pass	Fail	Fail	Pass	Fail	Fail	Fail	Fail	Fail	Fail	Fail	Ixodes ricinus
DK	DK-010	42	Fail	Pass	Fail	Fail	Pass	Fail	Fail	Fail	Fail	Fail	Fail	Fail	Fail	Fail	Fail	Ixodes ricinus
DK	DK-010	43	Fail	Pass	Pass	Fail	Fail	Fail	Fail	Fail	Pass	Fail	Fail	Fail	Fail	Fail	Pass	Ixodes ricinus
DK	DK-010	44	Fail	Pass	Pass	Fail	Fail	Fail	Fail	Fail	Fail	Fail	Fail	Fail	Fail	Fail	Fail	Ixodes ricinus
DK	DK-010	45	Fail	Fail	Fail	Fail	Fail	Fail	Fail	Fail	Fail	Fail	Fail	Fail	Fail	Fail	Fail	Ixodes ricinus
DK	DK-010	46	Fail	Pass	Pass	Fail	Fail	Fail	Fail	Fail	Pass	Fail	Fail	Fail	Fail	Pass	Pass	Ixodes ricinus
DK	DK-010	47	Fail	Pass	Fail	Fail	Fail	Fail	Fail	Fail	Fail	Fail	Fail	Fail	Fail	Pass	Pass	Ixodes ricinus
DK	DK-010	48	Fail	Pass	Pass	Fail	Fail	Fail	Fail	Fail	Fail	Fail	Fail	Fail	Fail	Pass	Pass	Ixodes ricinus
DK	DK-010	49	Fail	Fail	Fail	Fail	Fail	Fail	Fail	Fail	Pass	Fail	Fail	Fail	Fail	Fail	Fail	Ixodes ricinus
DK	DK-010	50	Fail	Pass	Pass	Fail	Fail	Fail	Fail	Fail	Pass	Fail	Fail	Fail	Fail	Fail	Fail	Ixodes ricinus
DK	DK-010	51	Fail	Pass	Fail	Pass	Pass	Fail	Fail	Fail	Fail	Fail	Fail	Fail	Fail	Fail	Fail	Ixodes ricinus
DK	DK-010	52	Fail	Pass	Pass	Fail	Fail	Fail	Fail	Fail	Fail	Fail	Fail	Fail	Fail	Pass	Pass	Ixodes ricinus
DK	DK-010	53	Fail	Pass	Pass	Fail	Fail	Fail	Fail	Fail	Fail	Fail	Fail	Fail	Pass	Pass	Pass	Ixodes ricinus
DK	DK-010	54	Fail	Fail	Fail	Fail	Fail	Fail	Fail	Fail	Pass	Fail	Fail	Fail	Pass	Fail	Fail	Ixodes ricinus
DK	DK-010	55	Fail	Fail	Fail	Fail	Fail	Fail	Fail	Fail	Fail	Fail	Fail	Fail	Fail	Pass	Pass	Ixodes ricinus
DK	DK-010	56	Fail	Pass	Pass	Fail	Fail	Fail	Fail	Fail	Fail	Fail	Fail	Fail	Fail	Pass	Pass	Ixodes ricinus
DK	DK-010	57	Fail	Fail	Fail	Fail	Fail	Fail	Fail	Fail	Pass	Fail	Fail	Fail	Fail	Pass	Pass	Ixodes ricinus
DK	DK-010	58	Fail	Fail	Fail	Fail	Fail	Fail	Fail	Fail	Fail	Fail	Fail	Fail	Fail	Fail	Fail	Ixodes ricinus
DK	DK-010	59	Fail	Pass	Pass	Fail	Fail	Fail	Fail	Fail	Pass	Fail	Fail	Fail	Fail	Fail	Fail	Ixodes ricinus
DK	DK-010	60	Fail	Pass	Pass	Fail	Pass	Fail	Fail	Fail	Fail	Fail	Fail	Fail	Fail	Fail	Fail	Ixodes ricinus
DK	DK-025	1	Fail	Pass	Pass	Fail	Fail	Fail	Fail	Fail	Fail	Fail	Fail	Fail	Fail	Fail	Fail	Ixodes ricinus
DK	DK-025	2	Fail	Fail	Fail	Fail	Fail	Fail	Fail	Fail	Fail	Fail	Fail	Fail	Fail	Fail	Fail	Ixodes ricinus
DK	DK-025	3	Fail	Pass	Pass	Fail	Fail	Fail	Fail	Fail	Pass	Fail	Fail	Fail	Fail	Fail	Fail	Ixodes ricinus
DK	DK-025	4	Fail	Pass	Pass	Fail	Fail	Fail	Fail	Fail	Fail	Fail	Fail	Fail	Fail	Fail	Fail	Ixodes ricinus
DK	DK-025	5	Fail	Fail	Fail	Fail	Fail	Fail	Fail	Fail	Fail	Fail	Fail	Fail	Fail	Fail	Fail	Ixodes ricinus
DK	DK-025	6	Fail	Pass	Pass	Fail	Fail	Fail	Fail	Fail	Fail	Pass	Fail	Fail	Fail	Fail	Fail	Ixodes ricinus
DK	DK-025	7	Fail	Fail	Fail	Fail	Fail	Fail	Fail	Fail	Fail	Fail	Fail	Fail	Fail	Fail	Fail	Ixodes ricinus
DK	DK-025	8	Fail	Pass	Pass	Pass	Fail	Fail	Pass	Fail	Fail	Fail	Fail	Fail	Fail	Fail	Fail	Ixodes ricinus
DK	DK-025	9	Fail	Fail	Fail	Fail	Fail	Fail	Fail	Fail	Fail	Fail	Fail	Fail	Fail	Fail	Fail	Ixodes ricinus
DK	DK-025	10	Fail	Pass	Pass	Fail	Fail	Fail	Fail	Pass	Fail	Fail	Fail	Fail	Fail	Fail	Fail	Ixodes ricinus
DK	DK-025	11	Fail	Pass	Pass	Fail	Fail	Fail	Fail	Fail	Fail	Fail	Fail	Fail	Fail	Fail	Fail	Ixodes ricinus
DK	DK-025	12	Fail	Pass	Fail	Pass	Pass	Fail	Fail	Pass	Fail	Fail	Fail	Fail	Fail	Fail	Fail	Ixodes ricinus
DK	DK-025	13	Fail	Fail	Fail	Fail	Fail	Fail	Fail	Fail	Fail	Fail	Fail	Fail	Fail	Fail	Fail	Ixodes ricinus
DK	DK-025	14	Fail	Fail	Fail	Fail	Fail	Fail	Fail	Fail	Fail	Fail	Fail	Fail	Fail	Pass	Pass	Ixodes ricinus
DK	DK-025	15	Fail	Pass	Pass	Fail	Fail	Fail	Fail	Fail	Fail	Fail	Fail	Fail	Fail	Fail	Fail	Ixodes ricinus
DK	DK-025	16	Fail	Pass	Fail	Fail	Pass	Fail	Fail	Pass	Fail	Fail	Fail	Fail	Fail	Fail	Fail	Ixodes ricinus
DK	DK-025	17	Fail	Pass	Pass	Fail	Pass	Fail	Pass	Fail	Fail	Fail	Fail	Fail	Fail	Pass	Pass	Ixodes ricinus
DK	DK-025	18	Fail	Fail	Fail	Fail	Fail	Fail	Fail	Fail	Pass	Fail	Fail	Fail	Fail	Pass	Pass	Ixodes ricinus
DK	DK-025	19	Fail	Pass	Pass	Fail	Fail	Fail	Fail	Fail	Pass	Fail	Fail	Fail	Fail	Fail	Fail	Ixodes ricinus
DK	DK-025	20	Fail	Pass	Fail	Fail	Fail	Fail	Fail	Pass	Pass	Fail	Fail	Fail	Fail	Pass	Pass	Ixodes ricinus
DK	DK-025	21	Fail	Pass	Pass	Fail	Fail	Fail	Fail	Fail	Fail	Fail	Fail	Fail	Pass	Fail	Fail	Ixodes ricinus
DK	DK-025	22	Pass	Pass	Pass	Fail	Pass	Fail	Fail	Pass	Fail	Fail	Fail	Fail	Pass	Fail	Fail	Ixodes ricinus
DK	DK-025	23	Fail	Pass	Fail	Fail	Fail	Fail	Fail	Fail	Fail	Fail	Fail	Fail	Pass	Pass	Pass	Ixodes ricinus
DK	DK-025	24	Fail	Fail	Fail	Fail	Fail	Fail	Fail	Fail	Fail	Fail	Fail	Fail	Fail	Fail	Fail	Ixodes ricinus
DK	DK-025	25	Fail	Pass	Fail	Fail	Pass	Fail	Fail	Pass	Fail	Fail	Fail	Fail	Fail	Fail	Fail	Ixodes ricinus
DK	DK-025	26	Fail	Fail	Fail	Fail	Fail	Fail	Fail	Fail	Fail	Fail	Fail	Fail	Fail	Pass	Pass	Ixodes ricinus
DK	DK-025	27	Fail	Pass	Pass	Fail	Fail	Fail	Pass	Fail	Fail	Fail	Fail	Fail	Pass	Pass	Pass	Ixodes ricinus
DK	DK-025	28	Fail	Pass	Fail	Fail	Fail	Fail	Fail	Pass	Fail	Fail	Fail	Fail	Fail	Fail	Fail	Ixodes ricinus
DK	DK-025	29	Fail	Pass	Fail	Fail	Fail	Fail	Fail	Fail	Fail	Fail	Fail	Fail	Pass	Pass	Pass	Ixodes ricinus
DK	DK-025	30	Fail	Pass	Fail	Fail	Fail	Fail	Fail	Fail	Fail	Fail	Fail	Fail	Fail	Fail	Fail	Ixodes ricinus
DK	DK-025	31	Fail	Fail	Fail	Fail	Fail	Fail	Fail	Fail	Fail	Fail	Fail	Fail	Fail	Fail	Fail	Ixodes ricinus
DK	DK-025	32	Fail	Fail	Fail	Fail	Fail	Fail	Fail	Fail	Fail	Fail	Fail	Fail	Fail	Fail	Fail	Ixodes ricinus
DK	DK-025	33	Fail	Fail	Fail	Fail	Fail	Fail	Fail	Fail	Fail	Fail	Fail	Fail	Fail	Fail	Fail	Ixodes ricinus
DK	DK-025	34	Fail	Pass	Fail	Fail	Pass	Fail	Fail	Fail	Fail	Fail	Fail	Fail	Pass	Fail	Fail	Ixodes ricinus
DK	DK-025	35	Fail	Pass	Pass	Fail	Pass	Fail	Fail	Pass	Fail	Fail	Fail	Fail	Fail	Pass	Pass	Ixodes ricinus
DK	DK-025	36	Fail	Pass	Fail	Fail	Fail	Fail	Fail	Pass	Pass	Fail	Fail	Fail	Fail	Fail	Fail	Ixodes ricinus
DK	DK-025	37	Fail	Pass	Fail	Fail	Fail	Fail	Fail	Fail	Pass	Fail	Fail	Fail	Fail	Pass	Pass	Ixodes ricinus
DK	DK-025	38	Fail	Fail	Fail	Fail	Fail	Fail	Fail	Fail	Fail	Fail	Fail	Fail	Fail	Pass	Pass	Ixodes ricinus
DK	DK-025	39	Fail	Fail	Fail	Fail	Fail	Fail	Fail	Fail	Fail	Fail	Fail	Fail	Fail	Pass	Pass	Ixodes ricinus
DK	DK-025	40	Fail	Pass	Fail	Fail	Fail	Fail	Fail	Pass	Fail	Fail	Fail	Fail	Fail	Fail	Fail	Ixodes ricinus
DK	DK-025	41	Fail	Pass	Fail	Fail	Fail	Fail	Pass	Fail	Fail	Fail	Fail	Pass	Fail	Fail	Fail	Ixodes ricinus
DK	DK-025	42	Fail	Fail	Fail	Fail	Fail	Fail	Fail	Fail	Fail	Fail	Fail	Fail	Fail	Fail	Fail	Ixodes ricinus
DK	DK-025	43	Fail	Pass	Fail	Fail	Pass	Fail	Fail	Fail	Fail	Fail	Fail	Fail	Fail	Fail	Fail	Ixodes ricinus
DK	DK-025	44	Fail	Pass	Fail	Fail	Pass	Fail	Fail	Pass	Pass	Fail	Fail	Fail	Fail	Fail	Fail	Ixodes ricinus
DK	DK-025	45	Fail	Pass	Pass	Fail	Fail	Fail	Fail	Fail	Pass	Fail	Fail	Fail	Fail	Pass	Pass	Ixodes ricinus
DK	DK-025	46	Fail	Fail	Fail	Fail	Fail	Fail	Fail	Fail	Pass	Fail	Fail	Fail	Fail	Fail	Fail	Ixodes ricinus
DK	DK-025	47	Fail	Pass	Fail	Fail	Fail	Fail	Fail	Pass	Pass	Fail	Fail	Pass	Fail	Fail	Fail	Ixodes ricinus
DK	DK-025	48	Fail	Fail	Fail	Fail	Fail	Fail	Fail	Fail	Fail	Fail	Fail	Fail	Fail	Fail	Fail	Ixodes ricinus
DK	DK-025	49	Fail	Fail	Fail	Fail	Fail	Fail	Fail	Pass	Fail	Fail	Fail	Fail	Pass	Fail	Fail	Ixodes ricinus
DK	DK-025	50	Fail	Fail	Fail	Fail	Fail	Fail	Fail	Fail	Fail	Fail	Fail	Pass	Pass	Pass	Pass	Ixodes ricinus
DK	DK-025	51	Fail	Pass	Pass	Fail	Fail	Fail	Fail	Fail	Fail	Fail	Fail	Fail	Pass	Fail	Fail	Ixodes ricinus
DK	DK-025	52	Fail	Fail	Fail	Fail	Fail	Fail	Fail	Fail	Fail	Fail	Fail	Fail	Pass	Pass	Pass	Ixodes ricinus
DK	DK-025	53	Fail	Pass	Pass	Fail	Fail	Fail	Fail	Fail	Fail	Fail	Fail	Fail	Fail	Fail	Fail	Ixodes ricinus
DK	DK-025	54	Fail	Fail	Fail	Fail	Fail	Fail	Fail	Fail	Fail	Fail	Fail	Fail	Fail	Fail	Fail	Ixodes ricinus
DK	DK-025	55	Fail	Pass	Pass	Fail	Fail	Fail	Fail	Fail	Fail	Fail	Fail	Fail	Fail	Pass	Pass	Ixodes ricinus
DK	DK-025	56	Fail	Pass	Pass	Fail	Fail	Fail	Pass	Fail	Fail	Fail	Fail	Fail	Fail	Pass	Pass	Ixodes ricinus
DK	DK-025	57	Fail	Pass	Fail	Fail	Fail	Fail	Fail	Pass	Fail	Fail	Fail	Fail	Pass	Fail	Fail	Ixodes ricinus
DK	DK-025	58	Fail	Pass	Fail	Fail	Fail	Fail	Fail	Pass	Fail	Fail	Fail	Fail	Fail	Pass	Pass	Ixodes ricinus
DK	DK-025	59	Fail	Fail	Fail	Fail	Fail	Fail	Fail	Fail	Fail	Fail	Fail	Fail	Fail	Fail	Fail	Ixodes ricinus
DK	DK-025	60	Fail	Pass	Fail	Fail	Fail	Fail	Fail	Fail	Fail	Fail	Fail	Fail	Fail	Fail	Fail	Ixodes ricinus
DK	DK-120	1	Fail	Pass	Pass	Fail	Fail	Fail	Fail	Fail	Fail	Fail	Fail	Fail	Fail	Pass	Pass	Ixodes ricinus
DK	DK-120	2	Fail	Pass	Pass	Fail	Fail	Fail	Fail	Fail	Fail	Fail	Fail	Fail	Fail	Pass	Pass	Ixodes ricinus
DK	DK-120	3	Fail	Pass	Pass	Fail	Fail	Fail	Fail	Fail	Pass	Fail	Fail	Fail	Fail	Pass	Pass	Ixodes ricinus
DK	DK-120	4	Fail	Fail	Fail	Fail	Fail	Fail	Fail	Fail	Fail	Pass	Fail	Fail	Fail	Pass	Pass	Ixodes ricinus
DK	DK-120	5	Fail	Fail	Fail	Fail	Fail	Fail	Fail	Fail	Fail	Fail	Fail	Fail	Fail	Fail	Fail	Ixodes ricinus
DK	DK-120	6	Fail	Pass	Pass	Fail	Fail	Fail	Fail	Fail	Fail	Fail	Fail	Fail	Fail	Fail	Fail	Ixodes ricinus
DK	DK-120	7	Fail	Pass	Fail	Pass	Fail	Fail	Fail	Fail	Fail	Fail	Fail	Fail	Fail	Pass	Pass	Ixodes ricinus
DK	DK-120	8	Fail	Pass	Pass	Fail	Fail	Fail	Fail	Fail	Pass	Fail	Fail	Fail	Fail	Pass	Pass	Ixodes ricinus
DK	DK-120	9	Fail	Pass	Pass	Pass	Pass	Fail	Fail	Pass	Fail	Fail	Fail	Fail	Fail	Fail	Fail	Ixodes ricinus
DK	DK-120	10	Fail	Fail	Pass	Fail	Fail	Fail	Fail	Fail	Fail	Fail	Fail	Fail	Fail	Pass	Pass	Ixodes ricinus
DK	DK-120	11	Fail	Pass	Fail	Pass	Fail	Fail	Fail	Pass	Fail	Fail	Fail	Fail	Fail	Fail	Fail	Ixodes ricinus
DK	DK-120	12	Pass	Pass	Fail	Fail	Fail	Fail	Fail	Fail	Fail	Fail	Fail	Fail	Fail	Pass	Pass	Ixodes ricinus
DK	DK-120	13	Fail	Pass	Fail	Fail	Fail	Fail	Fail	Fail	Fail	Fail	Fail	Fail	Fail	Fail	Fail	Ixodes ricinus
DK	DK-120	14	Fail	Pass	Fail	Fail	Fail	Fail	Fail	Pass	Fail	Fail	Fail	Fail	Fail	Fail	Fail	Ixodes ricinus
DK	DK-120	15	Fail	Pass	Pass	Fail	Fail	Fail	Fail	Fail	Pass	Fail	Fail	Fail	Fail	Fail	Fail	Ixodes ricinus
DK	DK-120	16	Fail	Pass	Pass	Fail	Fail	Fail	Fail	Fail	Fail	Fail	Fail	Fail	Fail	Pass	Pass	Ixodes ricinus
DK	DK-120	17	Fail	Pass	Pass	Fail	Fail	Fail	Fail	Fail	Fail	Fail	Fail	Fail	Fail	Fail	Fail	Ixodes ricinus
DK	DK-120	18	Fail	Fail	Fail	Fail	Fail	Fail	Fail	Fail	Fail	Fail	Fail	Fail	Fail	Fail	Fail	Ixodes ricinus
DK	DK-120	19	Fail	Pass	Pass	Pass	Fail	Fail	Fail	Fail	Fail	Fail	Fail	Fail	Fail	Fail	Fail	Ixodes ricinus
DK	DK-120	20	Fail	Fail	Fail	Fail	Fail	Fail	Fail	Fail	Fail	Fail	Fail	Fail	Fail	Fail	Fail	Ixodes ricinus
DK	DK-120	21	Fail	Pass	Pass	Fail	Fail	Fail	Fail	Fail	Fail	Fail	Fail	Fail	Pass	Fail	Fail	Ixodes ricinus
DK	DK-120	22	Fail	Pass	Pass	Fail	Fail	Fail	Fail	Fail	Fail	Fail	Fail	Fail	Pass	Fail	Fail	Ixodes ricinus
DK	DK-120	23	Fail	Pass	Pass	Fail	Fail	Fail	Fail	Fail	Fail	Fail	Fail	Fail	Fail	Fail	Fail	Ixodes ricinus
DK	DK-120	24	Fail	Pass	Fail	Pass	Pass	Fail	Fail	Fail	Fail	Fail	Fail	Fail	Fail	Fail	Fail	Ixodes ricinus
DK	DK-120	25	Fail	Fail	Fail	Fail	Fail	Fail	Fail	Fail	Fail	Fail	Fail	Fail	Fail	Fail	Fail	Ixodes ricinus
DK	DK-120	26	Fail	Pass	Fail	Fail	Pass	Fail	Pass	Fail	Fail	Fail	Fail	Fail	Fail	Pass	Pass	Ixodes ricinus
DK	DK-120	27	Pass	Pass	Pass	Fail	Fail	Fail	Fail	Fail	Fail	Fail	Fail	Fail	Fail	Fail	Fail	Ixodes ricinus
DK	DK-120	28	Fail	Pass	Pass	Fail	Fail	Fail	Fail	Fail	Fail	Fail	Fail	Fail	Fail	Fail	Fail	Ixodes ricinus
DK	DK-120	29	Fail	Pass	Fail	Pass	Fail	Fail	Fail	Fail	Fail	Fail	Fail	Fail	Fail	Pass	Pass	Ixodes ricinus
DK	DK-120	30	Fail	Fail	Fail	Fail	Fail	Fail	Fail	Fail	Fail	Fail	Fail	Fail	Fail	Pass	Pass	Ixodes ricinus
DK	DK-120	31	Fail	Fail	Fail	Fail	Fail	Fail	Fail	Fail	Fail	Fail	Fail	Fail	Fail	Pass	Fail	Ixodes ricinus
DK	DK-120	32	Fail	Pass	Fail	Fail	Fail	Fail	Fail	Fail	Fail	Fail	Fail	Fail	Fail	Fail	Fail	Ixodes ricinus
DK	DK-120	33	Fail	Pass	Pass	Fail	Fail	Fail	Fail	Fail	Pass	Fail	Fail	Fail	Fail	Pass	Pass	Ixodes ricinus
DK	DK-120	34	Fail	Fail	Fail	Fail	Fail	Fail	Fail	Fail	Fail	Fail	Fail	Fail	Fail	Fail	Fail	Ixodes ricinus
DK	DK-120	35	Fail	Pass	Pass	Fail	Fail	Fail	Fail	Fail	Fail	Fail	Fail	Fail	Pass	Pass	Pass	Ixodes ricinus
DK	DK-120	36	Fail	Fail	Fail	Fail	Fail	Fail	Fail	Fail	Fail	Fail	Fail	Fail	Fail	Fail	Fail	Ixodes ricinus
DK	DK-120	37	Fail	Pass	Pass	Pass	Fail	Fail	Fail	Fail	Fail	Fail	Fail	Fail	Fail	Pass	Pass	Ixodes ricinus
DK	DK-120	38	Fail	Fail	Fail	Fail	Fail	Fail	Fail	Fail	Fail	Fail	Fail	Fail	Fail	Fail	Fail	Ixodes ricinus
DK	DK-120	39	Fail	Pass	Fail	Fail	Pass	Fail	Pass	Fail	Fail	Fail	Fail	Fail	Fail	Pass	Pass	Ixodes ricinus
DK	DK-120	40	Pass	Pass	Fail	Fail	Fail	Fail	Fail	Fail	Fail	Fail	Fail	Fail	Fail	Fail	Fail	Ixodes ricinus
DK	DK-120	41	Fail	Pass	Fail	Pass	Fail	Fail	Fail	Fail	Fail	Fail	Fail	Fail	Fail	Pass	Pass	Ixodes ricinus
DK	DK-120	42	Fail	Pass	Fail	Pass	Pass	Fail	Fail	Fail	Fail	Fail	Fail	Fail	Fail	Fail	Fail	Ixodes ricinus
DK	DK-120	43	Fail	Pass	Pass	Fail	Fail	Fail	Fail	Fail	Fail	Fail	Fail	Fail	Fail	Fail	Fail	Ixodes ricinus
DK	DK-120	44	Fail	Fail	Fail	Fail	Fail	Fail	Fail	Fail	Fail	Fail	Fail	Fail	Fail	Pass	Pass	Ixodes ricinus
DK	DK-120	45	Fail	Pass	Pass	Fail	Fail	Fail	Fail	Fail	Fail	Fail	Fail	Fail	Fail	Pass	Pass	Ixodes ricinus
DK	DK-120	46	Fail	Pass	Fail	Pass	Fail	Fail	Fail	Fail	Fail	Fail	Fail	Fail	Fail	Pass	Pass	Ixodes ricinus
DK	DK-120	47	Fail	Pass	Pass	Fail	Fail	Fail	Fail	Fail	Pass	Fail	Fail	Fail	Fail	Fail	Fail	Ixodes ricinus
DK	DK-120	48	Fail	Pass	Pass	Pass	Fail	Fail	Fail	Fail	Fail	Fail	Fail	Fail	Fail	Fail	Fail	Ixodes ricinus
DK	DK-120	49	Fail	Fail	Fail	Fail	Fail	Fail	Fail	Fail	Fail	Fail	Fail	Fail	Fail	Fail	Fail	Ixodes ricinus
DK	DK-120	50	Fail	Fail	Fail	Fail	Fail	Fail	Fail	Fail	Fail	Fail	Fail	Fail	Fail	Fail	Fail	Ixodes ricinus
DK	DK-120	51	Fail	Fail	Fail	Fail	Fail	Fail	Fail	Fail	Pass	Fail	Fail	Fail	Fail	Pass	Pass	Ixodes ricinus
DK	DK-120	52	Fail	Pass	Pass	Fail	Fail	Fail	Fail	Fail	Fail	Fail	Fail	Fail	Pass	Fail	Fail	Ixodes ricinus
DK	DK-120	53	Fail	Pass	Fail	Fail	Fail	Fail	Fail	Pass	Pass	Fail	Fail	Fail	Fail	Pass	Pass	Ixodes ricinus
DK	DK-120	54	Fail	Fail	Fail	Fail	Fail	Fail	Fail	Fail	Fail	Fail	Fail	Fail	Fail	Pass	Pass	Ixodes ricinus
DK	DK-120	55	Fail	Fail	Fail	Fail	Fail	Fail	Fail	Fail	Fail	Fail	Fail	Fail	Fail	Pass	Pass	Ixodes ricinus
DK	DK-120	56	Fail	Pass	Pass	Fail	Fail	Fail	Fail	Fail	Fail	Fail	Fail	Fail	Fail	Fail	Fail	Ixodes ricinus
DK	DK-120	57	Fail	Pass	Fail	Pass	Fail	Fail	Fail	Fail	Fail	Fail	Fail	Fail	Fail	Pass	Pass	Ixodes ricinus
DK	DK-120	58	Fail	Fail	Fail	Fail	Fail	Fail	Fail	Fail	Pass	Fail	Fail	Fail	Fail	Fail	Fail	Ixodes ricinus
DK	DK-120	59	Fail	Pass	Pass	Pass	Fail	Fail	Fail	Fail	Fail	Fail	Fail	Fail	Fail	Pass	Fail	Ixodes ricinus
DK	DK-120	60	Fail	Pass	Pass	Pass	Fail	Fail	Fail	Fail	Fail	Fail	Fail	Fail	Pass	Pass	Pass	Ixodes ricinus
DK	DK-121	1	Fail	Pass	Pass	Fail	Pass	Fail	Fail	Pass	Pass	Fail	Fail	Fail	Fail	Pass	Pass	Ixodes ricinus
DK	DK-121	2	Fail	Pass	Fail	Fail	Pass	Fail	Pass	Fail	Fail	Fail	Fail	Fail	Fail	Fail	Fail	Ixodes ricinus
DK	DK-121	3	Fail	Pass	Pass	Fail	Fail	Fail	Fail	Fail	Pass	Fail	Fail	Fail	Fail	Fail	Fail	Ixodes ricinus
DK	DK-121	4	Fail	Fail	Fail	Fail	Fail	Fail	Fail	Fail	Pass	Fail	Fail	Fail	Fail	Fail	Fail	Ixodes ricinus
DK	DK-121	5	Pass	Pass	Pass	Fail	Fail	Fail	Fail	Fail	Pass	Fail	Fail	Fail	Fail	Pass	Pass	Ixodes ricinus
DK	DK-121	6	Fail	Pass	Pass	Fail	Fail	Fail	Fail	Fail	Pass	Fail	Fail	Fail	Fail	Pass	Pass	Ixodes ricinus
DK	DK-121	7	Fail	Fail	Fail	Fail	Fail	Fail	Fail	Fail	Fail	Fail	Fail	Fail	Fail	Pass	Pass	Ixodes ricinus
DK	DK-121	8	Fail	Pass	Pass	Fail	Fail	Fail	Fail	Fail	Pass	Fail	Fail	Fail	Fail	Fail	Fail	Ixodes ricinus
DK	DK-121	9	Fail	Fail	Fail	Fail	Fail	Fail	Fail	Fail	Pass	Fail	Fail	Fail	Fail	Pass	Pass	Ixodes ricinus
DK	DK-121	10	Fail	Pass	Pass	Fail	Fail	Fail	Fail	Fail	Fail	Fail	Fail	Fail	Fail	Fail	Fail	Ixodes ricinus
DK	DK-121	11	Fail	Fail	Fail	Fail	Fail	Fail	Fail	Fail	Fail	Fail	Fail	Fail	Fail	Fail	Fail	Ixodes ricinus
DK	DK-121	12	Fail	Fail	Fail	Fail	Fail	Fail	Fail	Fail	Fail	Fail	Fail	Fail	Fail	Fail	Fail	Ixodes ricinus
DK	DK-121	13	Fail	Fail	Fail	Fail	Fail	Fail	Fail	Fail	Fail	Fail	Fail	Fail	Fail	Fail	Fail	Ixodes ricinus
DK	DK-121	14	Fail	Pass	Pass	Fail	Fail	Fail	Fail	Fail	Pass	Fail	Fail	Fail	Fail	Fail	Fail	Ixodes ricinus
DK	DK-121	15	Fail	Pass	Pass	Fail	Fail	Fail	Fail	Fail	Pass	Fail	Fail	Fail	Fail	Fail	Fail	Ixodes ricinus
DK	DK-121	16	Fail	Fail	Fail	Fail	Fail	Fail	Fail	Fail	Fail	Fail	Fail	Fail	Fail	Pass	Pass	Ixodes ricinus
DK	DK-121	17	Fail	Pass	Fail	Fail	Fail	Fail	Pass	Fail	Pass	Fail	Fail	Fail	Fail	Fail	Fail	Ixodes ricinus
DK	DK-121	18	Fail	Pass	Fail	Fail	Pass	Fail	Fail	Fail	Fail	Fail	Fail	Fail	Fail	Pass	Pass	Ixodes ricinus
DK	DK-121	19	Fail	Pass	Pass	Fail	Fail	Fail	Fail	Fail	Fail	Fail	Fail	Fail	Fail	Fail	Fail	Ixodes ricinus
DK	DK-121	20	Fail	Fail	Fail	Fail	Fail	Fail	Fail	Fail	Fail	Fail	Fail	Fail	Fail	Fail	Fail	Ixodes ricinus
DK	DK-121	21	Fail	Pass	Pass	Fail	Pass	Fail	Pass	Fail	Fail	Fail	Fail	Fail	Fail	Pass	Pass	Ixodes ricinus
DK	DK-121	22	Fail	Pass	Pass	Fail	Pass	Fail	Pass	Fail	Pass	Pass	Fail	Fail	Fail	Fail	Fail	Ixodes ricinus
DK	DK-121	23	Fail	Pass	Pass	Fail	Fail	Fail	Pass	Fail	Pass	Fail	Fail	Fail	Fail	Fail	Fail	Ixodes ricinus
DK	DK-121	24	Fail	Pass	Pass	Fail	Fail	Fail	Fail	Fail	Pass	Fail	Fail	Fail	Fail	Pass	Pass	Ixodes ricinus
DK	DK-121	25	Fail	Pass	Fail	Fail	Pass	Fail	Fail	Fail	Pass	Fail	Fail	Fail	Fail	Fail	Fail	Ixodes ricinus
DK	DK-121	26	Fail	Fail	Fail	Fail	Fail	Fail	Fail	Fail	Pass	Fail	Fail	Fail	Fail	Pass	Pass	Ixodes ricinus
DK	DK-121	27	Fail	Fail	Fail	Fail	Fail	Fail	Fail	Fail	Fail	Fail	Fail	Fail	Fail	Pass	Pass	Ixodes ricinus
DK	DK-121	28	Fail	Fail	Fail	Fail	Fail	Fail	Fail	Fail	Fail	Fail	Fail	Fail	Fail	Fail	Fail	Ixodes ricinus
DK	DK-121	29	Fail	Fail	Fail	Fail	Fail	Fail	Fail	Fail	Fail	Fail	Fail	Fail	Fail	Fail	Fail	Ixodes ricinus
DK	DK-121	30	Fail	Pass	Pass	Fail	Fail	Fail	Pass	Fail	Fail	Fail	Fail	Fail	Fail	Fail	Fail	Ixodes ricinus
DK	DK-121	31	Fail	Pass	Pass	Fail	Fail	Fail	Fail	Fail	Fail	Fail	Fail	Fail	Fail	Fail	Fail	Ixodes ricinus
DK	DK-121	32	Fail	Pass	Pass	Fail	Pass	Fail	Pass	Fail	Pass	Fail	Fail	Fail	Fail	Pass	Pass	Ixodes ricinus
DK	DK-121	33	Pass	Pass	Pass	Fail	Fail	Fail	Fail	Fail	Pass	Fail	Fail	Fail	Fail	Fail	Fail	Ixodes ricinus
DK	DK-121	34	Fail	Pass	Pass	Fail	Fail	Fail	Fail	Fail	Fail	Fail	Fail	Fail	Fail	Fail	Fail	Ixodes ricinus
DK	DK-121	35	Fail	Pass	Pass	Fail	Fail	Fail	Fail	Fail	Pass	Fail	Fail	Fail	Fail	Fail	Fail	Ixodes ricinus
DK	DK-121	36	Fail	Fail	Fail	Fail	Fail	Fail	Fail	Fail	Pass	Pass	Fail	Fail	Fail	Pass	Pass	Ixodes ricinus
DK	DK-121	37	Fail	Fail	Fail	Fail	Fail	Fail	Fail	Fail	Fail	Fail	Fail	Fail	Fail	Pass	Pass	Ixodes ricinus
DK	DK-121	38	Fail	Pass	Pass	Fail	Fail	Fail	Fail	Fail	Fail	Fail	Fail	Fail	Fail	Fail	Fail	Ixodes ricinus
DK	DK-121	39	Fail	Pass	Fail	Fail	Fail	Fail	Pass	Fail	Pass	Fail	Fail	Fail	Fail	Fail	Fail	Ixodes ricinus
DK	DK-121	40	Fail	Pass	Pass	Fail	Fail	Fail	Fail	Fail	Pass	Pass	Fail	Fail	Fail	Pass	Pass	Ixodes ricinus
DK	DK-121	41	Fail	Pass	Pass	Fail	Fail	Fail	Fail	Fail	Pass	Fail	Fail	Fail	Fail	Pass	Pass	Ixodes ricinus
DK	DK-121	42	Fail	Fail	Fail	Fail	Fail	Fail	Fail	Fail	Pass	Fail	Fail	Fail	Fail	Pass	Pass	Ixodes ricinus
DK	DK-121	43	Pass	Pass	Pass	Fail	Fail	Fail	Fail	Fail	Fail	Fail	Fail	Fail	Fail	Fail	Fail	Ixodes ricinus
DK	DK-121	44	Fail	Pass	Pass	Fail	Fail	Fail	Fail	Fail	Fail	Fail	Fail	Fail	Fail	Fail	Fail	Ixodes ricinus
DK	DK-121	45	Fail	Fail	Fail	Fail	Fail	Fail	Fail	Fail	Fail	Fail	Fail	Fail	Fail	Pass	Pass	Ixodes ricinus
DK	DK-121	46	Fail	Pass	Pass	Fail	Fail	Fail	Fail	Fail	Pass	Fail	Fail	Fail	Fail	Fail	Fail	Ixodes ricinus
DK	DK-121	47	Fail	Pass	Pass	Fail	Fail	Fail	Fail	Fail	Pass	Fail	Fail	Fail	Fail	Pass	Pass	Ixodes ricinus
DK	DK-121	48	Fail	Pass	Pass	Fail	Fail	Fail	Fail	Fail	Fail	Fail	Fail	Fail	Fail	Fail	Fail	Ixodes ricinus
DK	DK-121	49	Fail	Pass	Fail	Fail	Pass	Fail	Fail	Pass	Pass	Fail	Fail	Fail	Fail	Fail	Fail	Ixodes ricinus
DK	DK-121	50	Fail	Fail	Fail	Fail	Fail	Fail	Fail	Fail	Pass	Pass	Fail	Fail	Fail	Pass	Pass	Ixodes ricinus
DK	DK-121	51	Fail	Pass	Pass	Fail	Fail	Fail	Fail	Fail	Fail	Fail	Fail	Fail	Fail	Pass	Pass	Ixodes ricinus
DK	DK-121	52	Fail	Pass	Pass	Fail	Fail	Fail	Fail	Fail	Fail	Fail	Fail	Fail	Fail	Fail	Fail	Ixodes ricinus
DK	DK-121	53	Fail	Pass	Pass	Fail	Fail	Fail	Pass	Fail	Fail	Fail	Fail	Fail	Fail	Fail	Fail	Ixodes ricinus
DK	DK-121	54	Fail	Fail	Fail	Fail	Fail	Fail	Fail	Fail	Fail	Fail	Fail	Fail	Fail	Fail	Fail	Ixodes ricinus
DK	DK-121	55	Fail	Pass	Pass	Fail	Fail	Fail	Pass	Fail	Pass	Fail	Fail	Fail	Fail	Pass	Pass	Ixodes ricinus
DK	DK-121	56	Fail	Fail	Fail	Fail	Fail	Fail	Fail	Fail	Fail	Fail	Fail	Fail	Fail	Pass	Pass	Ixodes ricinus
DK	DK-121	57	Fail	Fail	Fail	Fail	Fail	Fail	Fail	Fail	Pass	Fail	Fail	Fail	Fail	Fail	Fail	Ixodes ricinus
DK	DK-121	58	Fail	Pass	Pass	Fail	Fail	Fail	Fail	Fail	Fail	Fail	Fail	Fail	Fail	Fail	Fail	Ixodes ricinus
DK	DK-122	1	Fail	Pass	Fail	Fail	Pass	Fail	Fail	Fail	Fail	Fail	Fail	Fail	Fail	Pass	Pass	Ixodes ricinus
DK	DK-122	2	Fail	Pass	Pass	Fail	Fail	Fail	Fail	Fail	Fail	Fail	Fail	Fail	Pass	Fail	Fail	Ixodes ricinus
DK	DK-122	3	Fail	Fail	Fail	Fail	Fail	Fail	Fail	Fail	Fail	Fail	Fail	Fail	Fail	Fail	Fail	Ixodes ricinus
DK	DK-122	4	Pass	Pass	Fail	Fail	Fail	Fail	Fail	Fail	Fail	Fail	Fail	Fail	Pass	Fail	Fail	Ixodes ricinus
DK	DK-122	5	Fail	Pass	Fail	Fail	Fail	Fail	Fail	Pass	Fail	Fail	Fail	Fail	Fail	Fail	Fail	Ixodes ricinus
DK	DK-122	6	Pass	Pass	Pass	Fail	Fail	Fail	Fail	Fail	Fail	Fail	Fail	Fail	Fail	Pass	Pass	Ixodes ricinus
DK	DK-122	7	Fail	Pass	Pass	Fail	Pass	Fail	Fail	Fail	Fail	Fail	Fail	Fail	Fail	Fail	Fail	Ixodes ricinus
DK	DK-122	8	Fail	Fail	Fail	Fail	Fail	Fail	Fail	Fail	Fail	Fail	Fail	Fail	Pass	Pass	Pass	Ixodes ricinus
DK	DK-122	9	Fail	Pass	Pass	Fail	Fail	Fail	Fail	Fail	Fail	Fail	Fail	Fail	Pass	Fail	Fail	Ixodes ricinus
DK	DK-122	10	Fail	Pass	Pass	Fail	Fail	Fail	Fail	Fail	Pass	Fail	Fail	Fail	Pass	Fail	Fail	Ixodes ricinus
DK	DK-122	11	Fail	Fail	Fail	Fail	Fail	Fail	Fail	Fail	Fail	Fail	Fail	Fail	Fail	Pass	Pass	Ixodes ricinus
DK	DK-122	12	Fail	Fail	Fail	Fail	Fail	Fail	Fail	Fail	Fail	Fail	Fail	Fail	Fail	Fail	Fail	Ixodes ricinus
DK	DK-122	13	Fail	Pass	Pass	Fail	Fail	Fail	Fail	Fail	Fail	Fail	Fail	Pass	Fail	Fail	Fail	Ixodes ricinus
DK	DK-122	14	Fail	Fail	Fail	Fail	Fail	Fail	Fail	Fail	Fail	Fail	Fail	Fail	Fail	Fail	Fail	Ixodes ricinus
DK	DK-122	15	Fail	Pass	Pass	Fail	Fail	Fail	Fail	Fail	Fail	Fail	Fail	Fail	Pass	Pass	Pass	Ixodes ricinus
DK	DK-122	16	Fail	Pass	Fail	Pass	Fail	Fail	Fail	Pass	Fail	Fail	Fail	Fail	Fail	Fail	Fail	Ixodes ricinus
DK	DK-122	17	Fail	Fail	Fail	Fail	Fail	Fail	Fail	Fail	Fail	Fail	Fail	Fail	Fail	Pass	Pass	Ixodes ricinus
DK	DK-122	18	Fail	Pass	Pass	Fail	Pass	Fail	Fail	Pass	Fail	Fail	Fail	Fail	Fail	Pass	Pass	Ixodes ricinus
DK	DK-122	19	Fail	Pass	Pass	Fail	Fail	Fail	Fail	Fail	Fail	Fail	Fail	Fail	Fail	Fail	Fail	Ixodes ricinus
DK	DK-122	20	Fail	Pass	Pass	Fail	Fail	Fail	Fail	Fail	Fail	Fail	Fail	Fail	Fail	Fail	Fail	Ixodes ricinus
DK	DK-122	21	Fail	Pass	Pass	Fail	Pass	Fail	Fail	Pass	Fail	Fail	Fail	Fail	Fail	Pass	Pass	Ixodes ricinus
DK	DK-122	22	Fail	Pass	Pass	Pass	Fail	Fail	Fail	Fail	Fail	Fail	Fail	Fail	Fail	Fail	Fail	Ixodes ricinus
DK	DK-122	23	Pass	Pass	Pass	Fail	Fail	Fail	Fail	Fail	Fail	Fail	Fail	Fail	Pass	Fail	Fail	Ixodes ricinus
DK	DK-122	24	Fail	Pass	Pass	Pass	Fail	Fail	Fail	Fail	Pass	Fail	Fail	Fail	Fail	Pass	Pass	Ixodes ricinus
DK	DK-122	25	Fail	Pass	Pass	Fail	Fail	Fail	Fail	Fail	Fail	Fail	Fail	Fail	Fail	Fail	Fail	Ixodes ricinus
DK	DK-122	26	Pass	Pass	Fail	Fail	Fail	Fail	Fail	Fail	Fail	Fail	Fail	Fail	Fail	Fail	Fail	Ixodes ricinus
DK	DK-122	27	Fail	Pass	Fail	Pass	Pass	Fail	Fail	Fail	Fail	Fail	Fail	Fail	Pass	Fail	Fail	Ixodes ricinus
DK	DK-122	28	Fail	Pass	Fail	Pass	Fail	Fail	Fail	Fail	Fail	Fail	Fail	Fail	Pass	Pass	Pass	Ixodes ricinus
DK	DK-122	29	Fail	Pass	Pass	Fail	Fail	Fail	Fail	Fail	Fail	Fail	Fail	Fail	Fail	Pass	Pass	Ixodes ricinus
DK	DK-122	30	Fail	Pass	Pass	Pass	Fail	Fail	Fail	Fail	Fail	Fail	Fail	Fail	Fail	Pass	Pass	Ixodes ricinus
DK	DK-122	31	Fail	Pass	Fail	Pass	Fail	Fail	Fail	Fail	Fail	Fail	Fail	Fail	Fail	Fail	Fail	Ixodes ricinus
DK	DK-122	32	Fail	Pass	Fail	Pass	Fail	Fail	Fail	Fail	Fail	Fail	Fail	Fail	Fail	Fail	Fail	Ixodes ricinus
DK	DK-122	33	Fail	Fail	Fail	Fail	Fail	Fail	Fail	Fail	Fail	Fail	Fail	Fail	Fail	Fail	Fail	Ixodes ricinus
DK	DK-122	34	Fail	Fail	Fail	Fail	Fail	Fail	Fail	Fail	Fail	Fail	Fail	Fail	Fail	Fail	Fail	Ixodes ricinus
DK	DK-122	35	Fail	Pass	Fail	Pass	Fail	Fail	Fail	Pass	Fail	Fail	Fail	Fail	Fail	Fail	Fail	Ixodes ricinus
DK	DK-122	36	Pass	Pass	Pass	Fail	Fail	Fail	Fail	Fail	Fail	Fail	Fail	Fail	Pass	Pass	Pass	Ixodes ricinus
DK	DK-122	37	Fail	Fail	Fail	Fail	Fail	Fail	Fail	Fail	Fail	Fail	Fail	Fail	Fail	Pass	Pass	Ixodes ricinus
DK	DK-122	38	Fail	Fail	Fail	Fail	Fail	Fail	Fail	Fail	Fail	Fail	Fail	Fail	Fail	Fail	Fail	Ixodes ricinus
DK	DK-122	39	Fail	Pass	Pass	Fail	Pass	Fail	Fail	Pass	Fail	Fail	Fail	Fail	Pass	Fail	Fail	Ixodes ricinus
DK	DK-122	40	Fail	Pass	Pass	Pass	Pass	Fail	Pass	Fail	Fail	Fail	Fail	Fail	Fail	Fail	Fail	Ixodes ricinus
DK	DK-122	41	Fail	Pass	Pass	Fail	Fail	Fail	Fail	Fail	Fail	Fail	Fail	Fail	Fail	Fail	Fail	Ixodes ricinus
DK	DK-122	42	Fail	Pass	Pass	Pass	Fail	Fail	Fail	Fail	Fail	Fail	Fail	Fail	Fail	Pass	Pass	Ixodes ricinus
DK	DK-122	43	Fail	Pass	Fail	Pass	Fail	Fail	Fail	Pass	Fail	Fail	Fail	Fail	Pass	Pass	Pass	Ixodes ricinus
DK	DK-122	44	Fail	Pass	Pass	Fail	Fail	Fail	Fail	Fail	Fail	Fail	Fail	Fail	Fail	Pass	Pass	Ixodes ricinus
DK	DK-122	45	Fail	Fail	Fail	Fail	Fail	Fail	Fail	Fail	Fail	Fail	Fail	Fail	Fail	Fail	Fail	Ixodes ricinus
DK	DK-122	46	Fail	Fail	Fail	Fail	Fail	Fail	Fail	Fail	Pass	Fail	Fail	Fail	Fail	Pass	Pass	Ixodes ricinus
DK	DK-122	47	Fail	Fail	Fail	Fail	Fail	Fail	Fail	Fail	Pass	Fail	Fail	Pass	Pass	Pass	Pass	Ixodes ricinus
DK	DK-122	48	Fail	Pass	Pass	Fail	Fail	Fail	Fail	Pass	Fail	Fail	Fail	Fail	Fail	Fail	Fail	Ixodes ricinus
DK	DK-122	49	Fail	Pass	Pass	Pass	Pass	Fail	Fail	Pass	Fail	Fail	Fail	Fail	Fail	Fail	Fail	Ixodes ricinus
DK	DK-122	50	Fail	Pass	Pass	Fail	Fail	Fail	Fail	Fail	Fail	Fail	Fail	Fail	Fail	Fail	Fail	Ixodes ricinus
DK	DK-122	51	Fail	Fail	Fail	Fail	Fail	Fail	Fail	Fail	Fail	Fail	Fail	Fail	Fail	Fail	Fail	Ixodes ricinus
DK	DK-122	52	Fail	Pass	Pass	Fail	Pass	Fail	Fail	Fail	Fail	Fail	Fail	Fail	Pass	Fail	Fail	Ixodes ricinus
DK	DK-122	53	Fail	Fail	Fail	Fail	Fail	Fail	Fail	Fail	Fail	Fail	Fail	Fail	Fail	Fail	Fail	Ixodes ricinus
DK	DK-122	54	Fail	Fail	Fail	Fail	Fail	Fail	Fail	Fail	Fail	Fail	Fail	Fail	Fail	Pass	Pass	Ixodes ricinus
DK	DK-122	55	Pass	Pass	Fail	Pass	Fail	Fail	Fail	Fail	Fail	Fail	Fail	Fail	Fail	Fail	Fail	Ixodes ricinus
DK	DK-122	56	Fail	Fail	Fail	Fail	Fail	Fail	Fail	Fail	Fail	Fail	Fail	Fail	Fail	Pass	Pass	Ixodes ricinus
DK	DK-122	57	Fail	Fail	Fail	Fail	Fail	Fail	Fail	Fail	Fail	Fail	Fail	Fail	Fail	Pass	Pass	Ixodes ricinus
DK	DK-122	58	Fail	Pass	Pass	Fail	Fail	Fail	Fail	Fail	Fail	Fail	Fail	Fail	Fail	Fail	Fail	Ixodes ricinus
DK	DK-122	59	Fail	Pass	Fail	Pass	Fail	Fail	Fail	Fail	Fail	Fail	Fail	Fail	Fail	Fail	Fail	Ixodes ricinus
DK	DK-122	60	Fail	Pass	Pass	Fail	Fail	Fail	Fail	Fail	Fail	Fail	Fail	Fail	Fail	Fail	Fail	Ixodes ricinus
DK	DK-123	1	Fail	Pass	Fail	Fail	Pass	Fail	Fail	Fail	Pass	Fail	Fail	Fail	Pass	Pass	Pass	Ixodes ricinus
DK	DK-123	2	Fail	Fail	Fail	Fail	Fail	Fail	Fail	Fail	Pass	Fail	Fail	Fail	Fail	Fail	Fail	Ixodes ricinus
DK	DK-123	3	Fail	Fail	Fail	Fail	Fail	Fail	Fail	Fail	Fail	Fail	Fail	Fail	Pass	Pass	Pass	Ixodes ricinus
DK	DK-123	4	Fail	Pass	Pass	Fail	Fail	Fail	Fail	Pass	Fail	Fail	Fail	Fail	Fail	Pass	Pass	Ixodes ricinus
DK	DK-123	5	Fail	Pass	Pass	Fail	Fail	Fail	Fail	Fail	Fail	Fail	Fail	Fail	Fail	Pass	Pass	Ixodes ricinus
DK	DK-123	6	Fail	Pass	Pass	Fail	Fail	Fail	Fail	Fail	Fail	Fail	Fail	Fail	Fail	Pass	Pass	Ixodes ricinus
DK	DK-123	7	Fail	Pass	Pass	Fail	Fail	Fail	Fail	Pass	Fail	Fail	Fail	Fail	Pass	Pass	Pass	Ixodes ricinus
DK	DK-123	8	Fail	Pass	Fail	Fail	Pass	Fail	Fail	Fail	Pass	Fail	Fail	Fail	Fail	Fail	Fail	Ixodes ricinus
DK	DK-123	9	Fail	Pass	Pass	Fail	Pass	Fail	Fail	Pass	Pass	Fail	Fail	Fail	Pass	Fail	Fail	Ixodes ricinus
DK	DK-123	10	Fail	Fail	Fail	Fail	Fail	Fail	Fail	Fail	Fail	Fail	Fail	Pass	Fail	Fail	Fail	Ixodes ricinus
DK	DK-123	11	Fail	Pass	Fail	Fail	Pass	Fail	Fail	Pass	Fail	Fail	Fail	Fail	Pass	Pass	Pass	Ixodes ricinus
DK	DK-123	12	Fail	Pass	Pass	Fail	Fail	Fail	Fail	Fail	Fail	Fail	Fail	Fail	Fail	Pass	Pass	Ixodes ricinus
DK	DK-123	13	Fail	Fail	Fail	Fail	Fail	Fail	Fail	Fail	Fail	Fail	Fail	Fail	Pass	Fail	Fail	Ixodes ricinus
DK	DK-123	14	Fail	Pass	Pass	Fail	Pass	Pass	Fail	Fail	Fail	Fail	Fail	Fail	Fail	Pass	Fail	Ixodes ricinus
DK	DK-123	15	Pass	Pass	Fail	Fail	Pass	Fail	Fail	Fail	Pass	Fail	Fail	Fail	Fail	Pass	Pass	Ixodes ricinus
DK	DK-123	16	Fail	Pass	Pass	Fail	Pass	Fail	Fail	Fail	Fail	Fail	Fail	Fail	Pass	Pass	Pass	Ixodes ricinus
DK	DK-123	17	Fail	Fail	Fail	Fail	Fail	Fail	Fail	Fail	Fail	Fail	Fail	Fail	Fail	Fail	Fail	Ixodes ricinus
DK	DK-123	18	Fail	Pass	Pass	Fail	Fail	Fail	Fail	Fail	Fail	Fail	Fail	Fail	Fail	Pass	Pass	Ixodes ricinus
DK	DK-123	19	Fail	Pass	Fail	Fail	Pass	Fail	Pass	Fail	Fail	Fail	Fail	Fail	Fail	Pass	Pass	Ixodes ricinus
DK	DK-123	20	Fail	Pass	Pass	Fail	Fail	Fail	Fail	Fail	Fail	Fail	Fail	Fail	Pass	Pass	Pass	Ixodes ricinus
DK	DK-123	21	Fail	Pass	Fail	Fail	Pass	Fail	Fail	Pass	Pass	Fail	Fail	Fail	Fail	Pass	Pass	Ixodes ricinus
DK	DK-123	22	Fail	Pass	Fail	Fail	Fail	Fail	Fail	Fail	Fail	Fail	Fail	Fail	Fail	Pass	Pass	Ixodes ricinus
DK	DK-123	23	Fail	Pass	Pass	Fail	Fail	Fail	Fail	Fail	Pass	Pass	Fail	Fail	Pass	Pass	Pass	Ixodes ricinus
DK	DK-123	24	Fail	Pass	Pass	Fail	Fail	Fail	Fail	Pass	Pass	Fail	Fail	Fail	Pass	Pass	Pass	Ixodes ricinus
DK	DK-123	25	Fail	Pass	Fail	Fail	Pass	Fail	Fail	Fail	Pass	Fail	Fail	Fail	Pass	Fail	Fail	Ixodes ricinus
DK	DK-123	26	Fail	Fail	Fail	Fail	Fail	Fail	Fail	Fail	Fail	Fail	Fail	Pass	Fail	Fail	Fail	Ixodes ricinus
DK	DK-123	27	Fail	Fail	Fail	Fail	Fail	Fail	Fail	Fail	Pass	Fail	Fail	Fail	Fail	Pass	Pass	Ixodes ricinus
DK	DK-123	28	Fail	Pass	Fail	Fail	Fail	Pass	Fail	Fail	Fail	Fail	Fail	Fail	Fail	Pass	Pass	Ixodes ricinus
DK	DK-123	29	Fail	Pass	Fail	Fail	Pass	Fail	Pass	Fail	Pass	Fail	Fail	Fail	Pass	Pass	Pass	Ixodes ricinus
DK	DK-123	30	Fail	Pass	Pass	Fail	Fail	Fail	Fail	Fail	Fail	Fail	Fail	Fail	Fail	Fail	Fail	Ixodes ricinus
DK	DK-123	31	Fail	Pass	Fail	Fail	Fail	Fail	Fail	Fail	Fail	Fail	Fail	Fail	Pass	Fail	Fail	Ixodes ricinus
DK	DK-123	32	Fail	Pass	Pass	Fail	Fail	Fail	Fail	Fail	Fail	Fail	Fail	Fail	Pass	Fail	Fail	Ixodes ricinus
DK	DK-123	33	Fail	Pass	Fail	Fail	Fail	Fail	Fail	Fail	Pass	Fail	Fail	Fail	Pass	Pass	Pass	Ixodes ricinus
DK	DK-123	34	Fail	Fail	Fail	Fail	Fail	Fail	Fail	Fail	Pass	Fail	Fail	Fail	Fail	Fail	Fail	Ixodes ricinus
DK	DK-123	35	Fail	Fail	Fail	Fail	Fail	Fail	Fail	Fail	Fail	Fail	Fail	Fail	Pass	Pass	Pass	Ixodes ricinus
DK	DK-123	36	Fail	Pass	Pass	Fail	Fail	Fail	Fail	Fail	Fail	Fail	Fail	Pass	Fail	Fail	Pass	Ixodes ricinus
DK	DK-123	37	Fail	Pass	Pass	Fail	Fail	Fail	Fail	Fail	Fail	Fail	Fail	Fail	Fail	Pass	Pass	Ixodes ricinus
DK	DK-123	38	Fail	Pass	Fail	Fail	Fail	Fail	Fail	Pass	Pass	Fail	Fail	Fail	Fail	Fail	Fail	Ixodes ricinus
DK	DK-123	39	Fail	Pass	Pass	Fail	Fail	Fail	Fail	Fail	Fail	Fail	Fail	Fail	Fail	Pass	Pass	Ixodes ricinus
DK	DK-123	40	Fail	Pass	Pass	Fail	Fail	Fail	Fail	Fail	Pass	Fail	Fail	Fail	Fail	Pass	Pass	Ixodes ricinus
DK	DK-123	41	Fail	Fail	Fail	Fail	Fail	Fail	Fail	Fail	Fail	Fail	Fail	Fail	Fail	Pass	Pass	Ixodes ricinus
DK	DK-123	42	Fail	Pass	Pass	Fail	Fail	Fail	Fail	Fail	Fail	Fail	Fail	Fail	Fail	Fail	Fail	Ixodes ricinus
DK	DK-123	43	Fail	Pass	Pass	Fail	Fail	Fail	Fail	Fail	Fail	Fail	Fail	Fail	Pass	Pass	Pass	Ixodes ricinus
DK	DK-123	44	Fail	Fail	Fail	Fail	Fail	Fail	Fail	Fail	Fail	Fail	Fail	Fail	Fail	Pass	Pass	Ixodes ricinus
DK	DK-123	45	Fail	Pass	Pass	Fail	Fail	Fail	Fail	Fail	Fail	Fail	Fail	Fail	Pass	Pass	Pass	Ixodes ricinus
DK	DK-123	46	Fail	Pass	Pass	Pass	Fail	Fail	Fail	Pass	Fail	Fail	Fail	Fail	Fail	Fail	Fail	Ixodes ricinus
DK	DK-123	47	Fail	Pass	Fail	Fail	Pass	Fail	Pass	Fail	Fail	Fail	Fail	Fail	Fail	Pass	Pass	Ixodes ricinus
DK	DK-123	48	Fail	Fail	Fail	Fail	Fail	Fail	Fail	Fail	Pass	Fail	Fail	Fail	Fail	Fail	Fail	Ixodes ricinus
DK	DK-123	49	Fail	Pass	Pass	Fail	Fail	Fail	Fail	Fail	Pass	Fail	Fail	Fail	Fail	Pass	Pass	Ixodes ricinus
DK	DK-123	50	Pass	Pass	Pass	Fail	Fail	Fail	Fail	Fail	Pass	Fail	Fail	Fail	Fail	Pass	Fail	Ixodes ricinus
DK	DK-123	51	Fail	Pass	Fail	Fail	Pass	Fail	Fail	Fail	Fail	Fail	Fail	Fail	Fail	Pass	Pass	Ixodes ricinus
DK	DK-123	52	Fail	Pass	Fail	Fail	Fail	Fail	Fail	Fail	Pass	Fail	Fail	Fail	Fail	Pass	Fail	Ixodes ricinus
DK	DK-123	53	Fail	Pass	Pass	Fail	Fail	Fail	Fail	Fail	Pass	Fail	Fail	Fail	Fail	Fail	Fail	Ixodes ricinus
DK	DK-123	54	Fail	Fail	Fail	Fail	Fail	Fail	Fail	Fail	Pass	Fail	Fail	Fail	Fail	Fail	Fail	Ixodes ricinus
DK	DK-123	55	Fail	Pass	Pass	Fail	Pass	Fail	Pass	Fail	Fail	Fail	Fail	Fail	Pass	Fail	Fail	Ixodes ricinus
DK	DK-123	56	Fail	Pass	Pass	Fail	Fail	Fail	Fail	Fail	Pass	Fail	Fail	Fail	Pass	Pass	Pass	Ixodes ricinus
DK	DK-123	57	Fail	Pass	Pass	Fail	Fail	Fail	Fail	Fail	Fail	Fail	Fail	Fail	Fail	Pass	Pass	Ixodes ricinus
DK	DK-123	58	Fail	Pass	Pass	Fail	Fail	Fail	Fail	Fail	Fail	Fail	Fail	Fail	Fail	Fail	Fail	Ixodes ricinus
DK	DK-123	59	Fail	Fail	Fail	Fail	Fail	Fail	Fail	Fail	Pass	Fail	Fail	Fail	Fail	Pass	Pass	Ixodes ricinus
DK	DK-123	60	Fail	Fail	Fail	Fail	Fail	Fail	Fail	Fail	Pass	Fail	Fail	Fail	Pass	Fail	Fail	Ixodes ricinus
DK	DK-124	1	Fail	Fail	Fail	Fail	Fail	Fail	Fail	Fail	Fail	Fail	Fail	Fail	Fail	Pass	Pass	Ixodes ricinus
DK	DK-124	2	Fail	Fail	Fail	Fail	Fail	Fail	Fail	Fail	Fail	Fail	Fail	Fail	Fail	Pass	Pass	Ixodes ricinus
DK	DK-124	3	Fail	Pass	Fail	Fail	Fail	Fail	Fail	Fail	Fail	Fail	Fail	Fail	Fail	Pass	Pass	Ixodes ricinus
DK	DK-124	4	Fail	Fail	Fail	Fail	Fail	Fail	Fail	Fail	Pass	Fail	Fail	Fail	Fail	Fail	Fail	Ixodes ricinus
DK	DK-124	5	Fail	Pass	Fail	Fail	Fail	Fail	Fail	Fail	Fail	Fail	Fail	Fail	Fail	Pass	Pass	Ixodes ricinus
DK	DK-124	6	Fail	Pass	Fail	Pass	Fail	Fail	Fail	Fail	Fail	Fail	Fail	Fail	Fail	Pass	Fail	Ixodes ricinus
DK	DK-124	7	Fail	Fail	Fail	Fail	Fail	Fail	Fail	Fail	Fail	Fail	Fail	Fail	Fail	Fail	Fail	Ixodes ricinus
DK	DK-124	8	Fail	Fail	Fail	Fail	Fail	Fail	Fail	Fail	Fail	Fail	Fail	Fail	Fail	Pass	Pass	Ixodes ricinus
DK	DK-124	9	Fail	Fail	Fail	Fail	Fail	Fail	Fail	Fail	Pass	Fail	Fail	Fail	Fail	Fail	Fail	Ixodes ricinus
DK	DK-124	10	Fail	Fail	Fail	Fail	Fail	Fail	Fail	Fail	Fail	Fail	Fail	Fail	Fail	Pass	Pass	Ixodes ricinus
DK	DK-124	11	Pass	Pass	Fail	Fail	Fail	Fail	Fail	Fail	Pass	Fail	Fail	Fail	Fail	Fail	Fail	Ixodes ricinus
DK	DK-124	12	Fail	Fail	Fail	Fail	Fail	Fail	Fail	Fail	Pass	Fail	Fail	Fail	Fail	Fail	Fail	Ixodes ricinus
DK	DK-124	13	Fail	Pass	Fail	Pass	Fail	Fail	Fail	Fail	Pass	Fail	Fail	Fail	Fail	Pass	Pass	Ixodes ricinus
DK	DK-124	14	Fail	Fail	Fail	Fail	Fail	Fail	Fail	Fail	Pass	Fail	Fail	Fail	Fail	Fail	Fail	Ixodes ricinus
DK	DK-124	15	Fail	Fail	Fail	Fail	Fail	Fail	Fail	Fail	Fail	Fail	Fail	Fail	Fail	Fail	Fail	Ixodes ricinus
DK	DK-124	16	Fail	Fail	Fail	Fail	Fail	Fail	Fail	Fail	Fail	Fail	Fail	Fail	Fail	Fail	Fail	Ixodes ricinus
DK	DK-124	17	Fail	Pass	Fail	Fail	Fail	Fail	Fail	Pass	Fail	Fail	Fail	Fail	Fail	Pass	Pass	Ixodes ricinus
DK	DK-124	18	Fail	Fail	Fail	Fail	Fail	Fail	Fail	Fail	Fail	Fail	Fail	Fail	Fail	Fail	Fail	Ixodes ricinus
DK	DK-124	19	Fail	Pass	Pass	Fail	Fail	Fail	Fail	Fail	Fail	Fail	Fail	Fail	Fail	Pass	Fail	Ixodes ricinus
DK	DK-124	20	Fail	Fail	Fail	Fail	Fail	Fail	Fail	Fail	Fail	Fail	Fail	Fail	Fail	Fail	Fail	Ixodes ricinus
DK	DK-124	21	Fail	Fail	Fail	Fail	Fail	Fail	Fail	Fail	Pass	Fail	Fail	Fail	Fail	Pass	Pass	Ixodes ricinus
DK	DK-124	22	Fail	Fail	Fail	Fail	Fail	Fail	Fail	Fail	Fail	Fail	Fail	Fail	Fail	Fail	Fail	Ixodes ricinus
DK	DK-124	23	Fail	Pass	Pass	Fail	Fail	Fail	Fail	Fail	Pass	Fail	Fail	Fail	Pass	Fail	Fail	Ixodes ricinus
DK	DK-124	24	Fail	Fail	Fail	Fail	Fail	Fail	Fail	Fail	Fail	Fail	Fail	Fail	Fail	Fail	Fail	Ixodes ricinus
DK	DK-124	25	Fail	Fail	Fail	Fail	Fail	Fail	Fail	Fail	Fail	Fail	Fail	Fail	Fail	Fail	Fail	Ixodes ricinus
DK	DK-124	26	Fail	Fail	Fail	Fail	Fail	Fail	Fail	Fail	Fail	Fail	Fail	Fail	Fail	Fail	Fail	Ixodes ricinus
DK	DK-124	27	Fail	Fail	Fail	Fail	Fail	Fail	Fail	Fail	Fail	Fail	Fail	Fail	Fail	Fail	Fail	Ixodes ricinus
DK	DK-124	28	Fail	Fail	Fail	Fail	Fail	Fail	Fail	Fail	Fail	Fail	Fail	Fail	Fail	Pass	Pass	Ixodes ricinus
DK	DK-124	29	Fail	Pass	Pass	Fail	Fail	Fail	Fail	Fail	Fail	Fail	Fail	Fail	Fail	Fail	Fail	Ixodes ricinus
DK	DK-124	30	Fail	Pass	Fail	Fail	Pass	Fail	Pass	Fail	Pass	Fail	Fail	Fail	Fail	Fail	Fail	Ixodes ricinus
DK	DK-124	31	Fail	Fail	Fail	Fail	Fail	Fail	Fail	Fail	Fail	Fail	Fail	Fail	Fail	Fail	Fail	Ixodes ricinus
DK	DK-124	32	Fail	Fail	Fail	Fail	Fail	Fail	Fail	Fail	Fail	Fail	Fail	Fail	Fail	Fail	Fail	Ixodes ricinus
DK	DK-124	33	Fail	Fail	Fail	Fail	Fail	Fail	Fail	Fail	Fail	Fail	Fail	Fail	Fail	Fail	Fail	Ixodes ricinus
DK	DK-124	34	Fail	Fail	Fail	Fail	Fail	Fail	Fail	Fail	Fail	Fail	Fail	Fail	Fail	Pass	Pass	Ixodes ricinus
DK	DK-124	35	Fail	Fail	Fail	Fail	Fail	Fail	Fail	Fail	Pass	Fail	Fail	Fail	Fail	Fail	Fail	Ixodes ricinus
DK	DK-124	36	Fail	Fail	Fail	Fail	Fail	Fail	Fail	Fail	Fail	Fail	Fail	Fail	Fail	Pass	Pass	Ixodes ricinus
DK	DK-124	37	Fail	Fail	Fail	Fail	Fail	Fail	Fail	Fail	Pass	Fail	Fail	Fail	Fail	Fail	Fail	Ixodes ricinus
DK	DK-124	38	Fail	Fail	Fail	Fail	Fail	Fail	Fail	Fail	Fail	Fail	Fail	Fail	Fail	Fail	Fail	Ixodes ricinus
DK	DK-124	39	Fail	Fail	Fail	Fail	Fail	Fail	Fail	Fail	Fail	Fail	Fail	Fail	Fail	Pass	Fail	Ixodes ricinus
DK	DK-124	40	Fail	Fail	Fail	Fail	Fail	Fail	Fail	Fail	Fail	Fail	Fail	Fail	Fail	Fail	Fail	Ixodes ricinus
DK	DK-124	41	Fail	Fail	Fail	Fail	Fail	Fail	Fail	Fail	Fail	Fail	Fail	Pass	Fail	Pass	Pass	Ixodes ricinus
DK	DK-124	42	Fail	Pass	Fail	Fail	Pass	Fail	Fail	Pass	Fail	Fail	Fail	Fail	Fail	Fail	Fail	Ixodes ricinus
DK	DK-124	43	Fail	Fail	Fail	Fail	Fail	Fail	Fail	Fail	Pass	Fail	Fail	Fail	Fail	Fail	Fail	Ixodes ricinus
DK	DK-124	44	Fail	Pass	Pass	Fail	Fail	Fail	Fail	Fail	Pass	Fail	Fail	Fail	Fail	Pass	Pass	Ixodes ricinus
DK	DK-124	45	Fail	Fail	Fail	Fail	Fail	Fail	Fail	Fail	Fail	Fail	Fail	Fail	Fail	Fail	Fail	Ixodes ricinus
DK	DK-124	46	Fail	Fail	Fail	Fail	Fail	Fail	Fail	Fail	Fail	Fail	Fail	Fail	Fail	Pass	Pass	Ixodes ricinus
DK	DK-124	47	Fail	Fail	Fail	Fail	Fail	Fail	Fail	Fail	Pass	Fail	Fail	Fail	Fail	Fail	Fail	Ixodes ricinus
DK	DK-124	48	Pass	Pass	Fail	Pass	Fail	Fail	Fail	Fail	Fail	Fail	Fail	Fail	Fail	Pass	Pass	Ixodes ricinus
DK	DK-124	49	Fail	Fail	Fail	Fail	Fail	Fail	Fail	Fail	Fail	Fail	Fail	Fail	Fail	Pass	Pass	Ixodes ricinus
DK	DK-124	50	Fail	Pass	Pass	Fail	Fail	Fail	Fail	Pass	Fail	Fail	Fail	Fail	Pass	Fail	Fail	Ixodes ricinus
DK	DK-124	51	Fail	Fail	Fail	Fail	Fail	Fail	Fail	Fail	Fail	Fail	Fail	Fail	Fail	Pass	Pass	Ixodes ricinus
DK	DK-124	52	Fail	Fail	Fail	Fail	Fail	Fail	Fail	Fail	Fail	Fail	Fail	Fail	Fail	Fail	Pass	Ixodes ricinus
DK	DK-124	53	Fail	Fail	Fail	Fail	Fail	Fail	Fail	Fail	Pass	Fail	Fail	Fail	Fail	Pass	Pass	Ixodes ricinus
DK	DK-124	54	Fail	Pass	Pass	Pass	Fail	Fail	Fail	Fail	Fail	Fail	Fail	Fail	Fail	Pass	Pass	Ixodes ricinus
DK	DK-124	55	Fail	Fail	Fail	Fail	Fail	Fail	Fail	Fail	Fail	Fail	Fail	Fail	Fail	Fail	Fail	Ixodes ricinus
DK	DK-124	56	Fail	Pass	Pass	Fail	Fail	Fail	Fail	Fail	Fail	Fail	Fail	Fail	Fail	Pass	Pass	Ixodes ricinus
DK	DK-124	57	Fail	Fail	Fail	Fail	Fail	Fail	Fail	Fail	Fail	Fail	Fail	Fail	Fail	Fail	Fail	Ixodes ricinus
DK	DK-124	58	Fail	Pass	Pass	Fail	Fail	Fail	Fail	Fail	Fail	Pass	Fail	Fail	Pass	Fail	Fail	Ixodes ricinus
DK	DK-124	59	Fail	Pass	Fail	Pass	Fail	Fail	Fail	Fail	Fail	Pass	Fail	Fail	Fail	Fail	Fail	Ixodes ricinus
DK	DK-124	60	Fail	Fail	Fail	Fail	Fail	Fail	Fail	Fail	Fail	Fail	Fail	Fail	Fail	Fail	Fail	Ixodes ricinus
DK	DK-125	1	Fail	Pass	Pass	Fail	Fail	Fail	Fail	Fail	Fail	Fail	Fail	Fail	Fail	Fail	Fail	Ixodes ricinus
DK	DK-125	2	Fail	Fail	Fail	Fail	Fail	Fail	Fail	Fail	Pass	Fail	Fail	Fail	Fail	Fail	Fail	Ixodes ricinus
DK	DK-125	3	Pass	Pass	Pass	Fail	Fail	Fail	Fail	Fail	Fail	Fail	Fail	Fail	Fail	Fail	Fail	Ixodes ricinus
DK	DK-125	4	Fail	Pass	Pass	Fail	Fail	Fail	Fail	Fail	Fail	Fail	Fail	Fail	Pass	Fail	Fail	Ixodes ricinus
DK	DK-125	5	Fail	Pass	Pass	Fail	Fail	Fail	Fail	Fail	Fail	Fail	Fail	Fail	Fail	Fail	Fail	Ixodes ricinus
DK	DK-125	6	Fail	Pass	Pass	Fail	Pass	Fail	Fail	Fail	Fail	Fail	Fail	Fail	Pass	Fail	Fail	Ixodes ricinus
DK	DK-125	7	Fail	Fail	Fail	Fail	Fail	Fail	Fail	Fail	Fail	Fail	Fail	Fail	Fail	Fail	Fail	Ixodes ricinus
DK	DK-125	8	Fail	Pass	Pass	Fail	Pass	Fail	Pass	Fail	Fail	Fail	Fail	Fail	Fail	Fail	Fail	Ixodes ricinus
DK	DK-125	9	Fail	Pass	Pass	Fail	Fail	Fail	Fail	Fail	Fail	Fail	Fail	Fail	Fail	Pass	Pass	Ixodes ricinus
DK	DK-125	10	Fail	Pass	Pass	Fail	Fail	Fail	Fail	Fail	Fail	Fail	Fail	Fail	Fail	Fail	Fail	Ixodes ricinus
DK	DK-125	11	Fail	Fail	Fail	Fail	Fail	Fail	Fail	Fail	Fail	Fail	Fail	Fail	Pass	Pass	Pass	Ixodes ricinus
DK	DK-125	12	Fail	Pass	Pass	Fail	Fail	Fail	Pass	Pass	Pass	Fail	Fail	Fail	Fail	Fail	Fail	Ixodes ricinus
DK	DK-125	13	Fail	Pass	Pass	Fail	Pass	Fail	Pass	Fail	Fail	Fail	Fail	Fail	Pass	Pass	Pass	Ixodes ricinus
DK	DK-125	14	Fail	Pass	Pass	Fail	Fail	Fail	Fail	Fail	Fail	Fail	Fail	Fail	Fail	Fail	Fail	Ixodes ricinus
DK	DK-125	15	Fail	Pass	Pass	Fail	Fail	Fail	Fail	Fail	Fail	Fail	Fail	Fail	Fail	Fail	Fail	Ixodes ricinus
DK	DK-125	16	Fail	Pass	Pass	Fail	Fail	Fail	Fail	Fail	Pass	Fail	Fail	Fail	Pass	Fail	Fail	Ixodes ricinus
DK	DK-125	17	Fail	Pass	Pass	Fail	Pass	Fail	Fail	Fail	Fail	Fail	Fail	Fail	Fail	Fail	Fail	Ixodes ricinus
DK	DK-125	18	Fail	Pass	Pass	Fail	Fail	Fail	Fail	Fail	Fail	Fail	Fail	Fail	Pass	Fail	Fail	Ixodes ricinus
DK	DK-125	19	Fail	Pass	Pass	Fail	Pass	Fail	Fail	Fail	Fail	Fail	Fail	Fail	Fail	Pass	Pass	Ixodes ricinus
DK	DK-125	20	Fail	Pass	Fail	Fail	Fail	Fail	Fail	Pass	Fail	Fail	Fail	Fail	Fail	Fail	Fail	Ixodes ricinus
DK	DK-125	21	Fail	Pass	Pass	Fail	Fail	Fail	Fail	Pass	Pass	Fail	Fail	Fail	Pass	Fail	Pass	Ixodes ricinus
DK	DK-125	22	Fail	Pass	Pass	Fail	Fail	Fail	Fail	Fail	Fail	Fail	Fail	Fail	Fail	Fail	Fail	Ixodes ricinus
DK	DK-125	23	Fail	Pass	Pass	Fail	Fail	Fail	Fail	Fail	Fail	Fail	Fail	Fail	Fail	Fail	Fail	Ixodes ricinus
DK	DK-125	24	Fail	Fail	Fail	Fail	Fail	Fail	Fail	Fail	Pass	Fail	Fail	Fail	Fail	Fail	Fail	Ixodes ricinus
DK	DK-125	25	Fail	Fail	Fail	Fail	Fail	Fail	Fail	Fail	Fail	Fail	Fail	Fail	Fail	Fail	Fail	Ixodes ricinus
DK	DK-125	26	Fail	Pass	Fail	Fail	Pass	Fail	Fail	Fail	Fail	Fail	Fail	Fail	Fail	Fail	Fail	Ixodes ricinus
DK	DK-125	27	Fail	Pass	Pass	Fail	Fail	Fail	Fail	Fail	Pass	Fail	Fail	Fail	Fail	Fail	Fail	Ixodes ricinus
DK	DK-125	28	Fail	Pass	Pass	Fail	Fail	Fail	Fail	Fail	Fail	Fail	Fail	Fail	Fail	Fail	Fail	Ixodes ricinus
DK	DK-125	29	Fail	Pass	Pass	Fail	Fail	Fail	Fail	Fail	Fail	Fail	Fail	Fail	Pass	Pass	Pass	Ixodes ricinus
DK	DK-125	30	Fail	Fail	Fail	Fail	Fail	Fail	Fail	Fail	Fail	Fail	Fail	Fail	Fail	Pass	Pass	Ixodes ricinus
DK	DK-125	31	Fail	Fail	Fail	Fail	Fail	Fail	Fail	Fail	Fail	Fail	Fail	Fail	Fail	Fail	Fail	Ixodes ricinus
DK	DK-125	32	Fail	Pass	Pass	Pass	Fail	Fail	Fail	Fail	Fail	Fail	Fail	Fail	Fail	Fail	Fail	Ixodes ricinus
DK	DK-125	33	Pass	Pass	Pass	Fail	Fail	Fail	Fail	Fail	Fail	Fail	Fail	Fail	Fail	Fail	Fail	Ixodes ricinus
DK	DK-125	34	Fail	Pass	Pass	Fail	Fail	Fail	Fail	Fail	Fail	Fail	Fail	Fail	Fail	Fail	Fail	Ixodes ricinus
DK	DK-125	35	Fail	Pass	Pass	Fail	Fail	Fail	Fail	Fail	Fail	Fail	Fail	Fail	Fail	Fail	Fail	Ixodes ricinus
DK	DK-125	36	Fail	Pass	Pass	Fail	Fail	Fail	Fail	Fail	Fail	Fail	Fail	Fail	Fail	Pass	Pass	Ixodes ricinus
DK	DK-125	37	Fail	Pass	Pass	Fail	Fail	Fail	Fail	Fail	Fail	Fail	Fail	Fail	Fail	Fail	Pass	Ixodes ricinus
DK	DK-125	38	Fail	Pass	Pass	Fail	Pass	Fail	Fail	Fail	Fail	Fail	Fail	Fail	Fail	Fail	Fail	Ixodes ricinus
DK	DK-125	39	Fail	Fail	Fail	Fail	Fail	Fail	Fail	Fail	Fail	Fail	Fail	Fail	Fail	Fail	Fail	Ixodes ricinus
DK	DK-125	40	Fail	Pass	Pass	Fail	Fail	Fail	Fail	Fail	Fail	Fail	Fail	Fail	Pass	Pass	Pass	Ixodes ricinus
DK	DK-125	41	Fail	Pass	Fail	Fail	Pass	Fail	Pass	Fail	Fail	Fail	Fail	Fail	Fail	Fail	Fail	Ixodes ricinus
DK	DK-125	42	Fail	Pass	Fail	Fail	Pass	Fail	Fail	Fail	Fail	Fail	Fail	Fail	Fail	Fail	Fail	Ixodes ricinus
DK	DK-125	43	Fail	Pass	Fail	Fail	Fail	Fail	Fail	Pass	Pass	Fail	Fail	Fail	Fail	Fail	Fail	Ixodes ricinus
DK	DK-125	44	Fail	Pass	Pass	Fail	Fail	Fail	Fail	Fail	Fail	Fail	Fail	Fail	Pass	Fail	Fail	Ixodes ricinus
DK	DK-125	45	Fail	Pass	Pass	Pass	Fail	Fail	Fail	Fail	Fail	Fail	Fail	Fail	Fail	Fail	Fail	Ixodes ricinus
DK	DK-125	46	Fail	Pass	Pass	Fail	Fail	Fail	Fail	Fail	Fail	Fail	Fail	Fail	Fail	Fail	Fail	Ixodes ricinus
DK	DK-125	47	Fail	Pass	Pass	Fail	Pass	Fail	Fail	Fail	Fail	Fail	Fail	Fail	Pass	Pass	Pass	Ixodes ricinus
DK	DK-125	48	Fail	Pass	Pass	Fail	Pass	Fail	Pass	Fail	Fail	Fail	Fail	Fail	Fail	Fail	Fail	Ixodes ricinus
DK	DK-125	49	Fail	Pass	Pass	Fail	Fail	Fail	Fail	Fail	Fail	Fail	Fail	Fail	Fail	Fail	Fail	Ixodes ricinus
DK	DK-125	50	Fail	Fail	Fail	Fail	Fail	Fail	Fail	Fail	Fail	Fail	Fail	Fail	Pass	Fail	Fail	Ixodes ricinus
DK	DK-125	51	Fail	Pass	Pass	Fail	Fail	Fail	Fail	Fail	Fail	Fail	Fail	Fail	Pass	Fail	Fail	Ixodes ricinus
DK	DK-125	52	Fail	Pass	Fail	Fail	Pass	Fail	Fail	Fail	Fail	Fail	Fail	Fail	Fail	Fail	Fail	Ixodes ricinus
DK	DK-125	53	Fail	Pass	Pass	Fail	Pass	Fail	Pass	Fail	Fail	Fail	Fail	Fail	Pass	Fail	Fail	Ixodes ricinus
DK	DK-125	54	Fail	Pass	Pass	Fail	Fail	Fail	Fail	Fail	Fail	Fail	Fail	Fail	Pass	Fail	Fail	Ixodes ricinus
DK	DK-125	55	Fail	Pass	Fail	Fail	Pass	Fail	Fail	Fail	Fail	Fail	Fail	Fail	Pass	Fail	Fail	Ixodes ricinus
DK	DK-125	56	Fail	Fail	Fail	Fail	Fail	Fail	Fail	Fail	Fail	Fail	Fail	Fail	Fail	Fail	Fail	Ixodes ricinus
DK	DK-125	57	Fail	Pass	Pass	Fail	Fail	Fail	Fail	Fail	Fail	Fail	Fail	Fail	Fail	Fail	Fail	Ixodes ricinus
DK	DK-125	58	Fail	Pass	Pass	Fail	Fail	Fail	Fail	Fail	Fail	Fail	Fail	Fail	Fail	Fail	Fail	Ixodes ricinus
DK	DK-125	59	Fail	Pass	Fail	Fail	Pass	Fail	Pass	Fail	Pass	Fail	Fail	Fail	Fail	Fail	Fail	Ixodes ricinus
DK	DK-125	60	Fail	Pass	Pass	Fail	Fail	Fail	Fail	Fail	Fail	Fail	Fail	Fail	Fail	Pass	Pass	Ixodes ricinus
DK	DK-201	1	Fail	Pass	Fail	Pass	Pass	Fail	Fail	Fail	Fail	Fail	Fail	Fail	Fail	Fail	Fail	Ixodes ricinus
DK	DK-201	2	Fail	Pass	Fail	Pass	Pass	Fail	Pass	Fail	Fail	Pass	Fail	Fail	Fail	Pass	Pass	Ixodes ricinus
DK	DK-201	3	Pass	Pass	Pass	Fail	Fail	Fail	Fail	Fail	Fail	Fail	Fail	Fail	Fail	Pass	Pass	Ixodes ricinus
DK	DK-201	4	Fail	Pass	Pass	Fail	Fail	Fail	Fail	Fail	Pass	Fail	Fail	Fail	Fail	Pass	Pass	Ixodes ricinus
DK	DK-201	5	Fail	Fail	Fail	Fail	Fail	Fail	Fail	Fail	Fail	Fail	Fail	Fail	Fail	Fail	Fail	Ixodes ricinus
DK	DK-201	6	Fail	Pass	Pass	Fail	Fail	Fail	Fail	Fail	Fail	Fail	Fail	Fail	Fail	Fail	Fail	Ixodes ricinus
DK	DK-201	7	Fail	Pass	Pass	Fail	Pass	Fail	Pass	Fail	Fail	Fail	Fail	Fail	Fail	Fail	Fail	Ixodes ricinus
DK	DK-201	8	Fail	Fail	Fail	Fail	Fail	Fail	Fail	Fail	Fail	Fail	Fail	Fail	Fail	Fail	Fail	Ixodes ricinus
DK	DK-201	9	Fail	Fail	Fail	Fail	Fail	Fail	Fail	Fail	Fail	Fail	Fail	Fail	Fail	Fail	Fail	Ixodes ricinus
DK	DK-201	10	Fail	Fail	Fail	Fail	Fail	Fail	Fail	Fail	Fail	Fail	Fail	Fail	Fail	Fail	Fail	Ixodes ricinus
DK	DK-201	11	Fail	Pass	Pass	Fail	Fail	Fail	Fail	Fail	Fail	Fail	Fail	Fail	Pass	Fail	Fail	Ixodes ricinus
DK	DK-201	12	Fail	Pass	Pass	Fail	Pass	Fail	Fail	Pass	Fail	Fail	Fail	Fail	Fail	Fail	Fail	Ixodes ricinus
DK	DK-201	13	Fail	Pass	Pass	Fail	Fail	Fail	Fail	Pass	Fail	Fail	Fail	Pass	Fail	Fail	Fail	Ixodes ricinus
DK	DK-201	14	Pass	Pass	Fail	Pass	Fail	Fail	Fail	Fail	Fail	Fail	Fail	Fail	Fail	Fail	Fail	Ixodes ricinus
DK	DK-201	15	Fail	Pass	Fail	Fail	Pass	Fail	Pass	Fail	Fail	Fail	Fail	Fail	Fail	Fail	Fail	Ixodes ricinus
DK	DK-201	16	Fail	Fail	Fail	Fail	Fail	Fail	Fail	Fail	Fail	Fail	Fail	Fail	Fail	Pass	Pass	Ixodes ricinus
DK	DK-201	17	Fail	Pass	Fail	Pass	Fail	Fail	Fail	Fail	Fail	Fail	Fail	Fail	Pass	Fail	Fail	Ixodes ricinus
DK	DK-201	18	Fail	Pass	Pass	Fail	Pass	Fail	Fail	Fail	Pass	Fail	Fail	Pass	Fail	Fail	Fail	Ixodes ricinus
DK	DK-201	19	Fail	Pass	Fail	Fail	Pass	Fail	Pass	Fail	Fail	Fail	Fail	Fail	Fail	Pass	Pass	Ixodes ricinus
DK	DK-201	20	Pass	Pass	Pass	Fail	Pass	Fail	Fail	Fail	Fail	Fail	Fail	Fail	Pass	Pass	Pass	Ixodes ricinus
DK	DK-201	21	Fail	Pass	Pass	Fail	Fail	Fail	Fail	Fail	Fail	Fail	Fail	Fail	Fail	Fail	Fail	Ixodes ricinus
DK	DK-201	22	Pass	Pass	Fail	Fail	Fail	Fail	Fail	Fail	Fail	Fail	Fail	Fail	Fail	Fail	Fail	Ixodes ricinus
DK	DK-201	23	Fail	Pass	Pass	Fail	Fail	Fail	Fail	Fail	Fail	Fail	Fail	Fail	Fail	Fail	Fail	Ixodes ricinus
DK	DK-201	24	Fail	Pass	Fail	Fail	Pass	Fail	Fail	Fail	Fail	Fail	Fail	Fail	Fail	Fail	Fail	Ixodes ricinus
DK	DK-201	25	Fail	Pass	Fail	Fail	Pass	Fail	Fail	Fail	Fail	Fail	Fail	Fail	Fail	Pass	Pass	Ixodes ricinus
DK	DK-201	26	Fail	Pass	Pass	Fail	Fail	Fail	Fail	Fail	Fail	Fail	Fail	Fail	Pass	Fail	Fail	Ixodes ricinus
DK	DK-201	27	Fail	Fail	Fail	Fail	Fail	Fail	Fail	Fail	Fail	Fail	Fail	Fail	Fail	Fail	Fail	Ixodes ricinus
DK	DK-201	28	Fail	Pass	Fail	Fail	Pass	Fail	Fail	Fail	Fail	Fail	Fail	Fail	Fail	Pass	Pass	Ixodes ricinus
DK	DK-201	29	Fail	Fail	Fail	Fail	Fail	Fail	Fail	Fail	Fail	Fail	Fail	Fail	Fail	Pass	Pass	Ixodes ricinus
DK	DK-201	30	Fail	Pass	Pass	Fail	Fail	Fail	Fail	Fail	Fail	Fail	Fail	Fail	Fail	Fail	Fail	Ixodes ricinus
DK	DK-201	31	Fail	Fail	Fail	Fail	Fail	Fail	Fail	Fail	Fail	Fail	Fail	Fail	Fail	Fail	Fail	Ixodes ricinus
DK	DK-201	32	Fail	Pass	Pass	Fail	Fail	Fail	Fail	Fail	Fail	Fail	Fail	Fail	Fail	Fail	Fail	Ixodes ricinus
DK	DK-201	33	Fail	Pass	Fail	Fail	Pass	Fail	Fail	Fail	Fail	Fail	Fail	Fail	Fail	Pass	Pass	Ixodes ricinus
DK	DK-201	34	Fail	Pass	Pass	Fail	Fail	Fail	Fail	Fail	Fail	Fail	Fail	Fail	Fail	Fail	Fail	Ixodes ricinus
DK	DK-201	35	Fail	Fail	Fail	Fail	Fail	Fail	Fail	Fail	Fail	Fail	Fail	Fail	Fail	Pass	Pass	Ixodes ricinus
DK	DK-201	36	Fail	Fail	Fail	Fail	Fail	Fail	Fail	Fail	Fail	Fail	Fail	Fail	Fail	Fail	Fail	Ixodes ricinus
DK	DK-201	37	Fail	Pass	Fail	Pass	Fail	Fail	Fail	Fail	Fail	Fail	Fail	Fail	Fail	Fail	Fail	Ixodes ricinus
DK	DK-201	38	Fail	Pass	Fail	Fail	Pass	Fail	Pass	Fail	Fail	Fail	Fail	Fail	Fail	Fail	Fail	Ixodes ricinus
DK	DK-201	39	Fail	Pass	Fail	Pass	Fail	Fail	Fail	Fail	Pass	Fail	Fail	Fail	Fail	Pass	Pass	Ixodes ricinus
DK	DK-201	40	Fail	Pass	Fail	Fail	Pass	Fail	Pass	Fail	Fail	Fail	Fail	Fail	Fail	Pass	Pass	Ixodes ricinus
DK	DK-201	41	Fail	Pass	Pass	Pass	Pass	Fail	Fail	Fail	Fail	Fail	Fail	Pass	Fail	Fail	Fail	Ixodes ricinus
DK	DK-201	42	Fail	Pass	Pass	Fail	Fail	Fail	Fail	Fail	Pass	Fail	Fail	Fail	Pass	Fail	Fail	Ixodes ricinus
DK	DK-201	43	Fail	Fail	Fail	Fail	Fail	Fail	Fail	Fail	Fail	Fail	Fail	Fail	Fail	Fail	Fail	Ixodes ricinus
DK	DK-201	44	Fail	Fail	Fail	Fail	Fail	Fail	Fail	Fail	Fail	Fail	Fail	Fail	Fail	Pass	Fail	Ixodes ricinus
DK	DK-201	45	Fail	Pass	Pass	Fail	Fail	Fail	Fail	Fail	Fail	Fail	Fail	Fail	Fail	Pass	Pass	Ixodes ricinus
DK	DK-201	46	Fail	Pass	Fail	Fail	Pass	Fail	Pass	Pass	Fail	Fail	Fail	Fail	Fail	Fail	Fail	Ixodes ricinus
DK	DK-201	47	Fail	Fail	Fail	Fail	Fail	Fail	Fail	Fail	Fail	Fail	Fail	Fail	Fail	Pass	Pass	Ixodes ricinus
DK	DK-201	48	Fail	Pass	Fail	Pass	Pass	Fail	Fail	Pass	Fail	Fail	Fail	Fail	Fail	Fail	Fail	Ixodes ricinus
DK	DK-201	49	Fail	Pass	Fail	Fail	Pass	Fail	Fail	Fail	Fail	Fail	Fail	Fail	Fail	Pass	Pass	Ixodes ricinus
DK	DK-201	50	Fail	Fail	Fail	Fail	Fail	Fail	Fail	Fail	Fail	Fail	Fail	Fail	Fail	Fail	Fail	Ixodes ricinus
DK	DK-201	51	Fail	Fail	Fail	Fail	Fail	Fail	Fail	Fail	Pass	Fail	Fail	Fail	Fail	Pass	Pass	Ixodes ricinus
DK	DK-201	52	Fail	Fail	Fail	Fail	Fail	Fail	Fail	Fail	Fail	Fail	Fail	Fail	Fail	Fail	Fail	Ixodes ricinus
DK	DK-201	53	Fail	Pass	Pass	Fail	Pass	Fail	Pass	Pass	Fail	Fail	Fail	Fail	Fail	Fail	Fail	Ixodes ricinus
DK	DK-201	54	Fail	Fail	Fail	Fail	Fail	Fail	Fail	Fail	Pass	Fail	Fail	Fail	Fail	Fail	Fail	Ixodes ricinus
DK	DK-201	55	Fail	Fail	Fail	Fail	Fail	Fail	Fail	Fail	Fail	Fail	Fail	Fail	Fail	Fail	Fail	Ixodes ricinus
DK	DK-201	56	Fail	Pass	Pass	Pass	Fail	Fail	Fail	Fail	Pass	Fail	Fail	Fail	Fail	Fail	Fail	Ixodes ricinus
DK	DK-201	57	Fail	Pass	Pass	Fail	Fail	Fail	Fail	Fail	Fail	Fail	Fail	Fail	Fail	Fail	Fail	Ixodes ricinus
DK	DK-201	58	Fail	Fail	Fail	Fail	Fail	Fail	Fail	Fail	Fail	Fail	Fail	Fail	Fail	Fail	Fail	Ixodes ricinus
DK	DK-201	59	Fail	Pass	Pass	Fail	Fail	Fail	Fail	Fail	Fail	Fail	Fail	Fail	Fail	Pass	Pass	Ixodes ricinus
DK	DK-201	60	Fail	Pass	Pass	Fail	Fail	Fail	Fail	Fail	Fail	Fail	Fail	Fail	Fail	Pass	Pass	Ixodes ricinus
DK	DK-237	1	Fail	Fail	Fail	Fail	Fail	Fail	Fail	Fail	Fail	Fail	Fail	Fail	Fail	Fail	Fail	Ixodes ricinus
DK	DK-237	2	Fail	Fail	Fail	Fail	Fail	Fail	Fail	Fail	Fail	Fail	Fail	Fail	Fail	Pass	Pass	Ixodes ricinus
DK	DK-237	3	Pass	Pass	Pass	Pass	Fail	Fail	Fail	Fail	Fail	Fail	Fail	Pass	Fail	Fail	Fail	Ixodes ricinus
DK	DK-237	4	Fail	Pass	Pass	Fail	Fail	Fail	Fail	Fail	Pass	Fail	Fail	Fail	Fail	Pass	Pass	Ixodes ricinus
DK	DK-237	5	Fail	Pass	Pass	Fail	Fail	Fail	Fail	Fail	Fail	Fail	Fail	Fail	Fail	Pass	Pass	Ixodes ricinus
DK	DK-237	6	Fail	Fail	Fail	Fail	Fail	Fail	Fail	Fail	Fail	Fail	Fail	Fail	Fail	Pass	Pass	Ixodes ricinus
DK	DK-237	7	Fail	Pass	Fail	Pass	Fail	Fail	Fail	Fail	Fail	Fail	Fail	Fail	Fail	Fail	Fail	Ixodes ricinus
DK	DK-237	8	Fail	Pass	Pass	Fail	Fail	Fail	Fail	Fail	Fail	Fail	Fail	Fail	Fail	Fail	Fail	Ixodes ricinus
DK	DK-237	9	Pass	Pass	Pass	Fail	Fail	Fail	Fail	Fail	Fail	Fail	Fail	Fail	Fail	Fail	Fail	Ixodes ricinus
DK	DK-237	10	Fail	Fail	Fail	Fail	Fail	Fail	Fail	Fail	Pass	Fail	Fail	Fail	Fail	Fail	Fail	Ixodes ricinus
DK	DK-237	11	Fail	Pass	Fail	Pass	Fail	Fail	Fail	Fail	Fail	Fail	Fail	Fail	Fail	Pass	Pass	Ixodes ricinus
DK	DK-237	12	Fail	Pass	Pass	Fail	Pass	Fail	Pass	Fail	Fail	Fail	Fail	Fail	Fail	Fail	Fail	Ixodes ricinus
DK	DK-237	13	Fail	Pass	Fail	Pass	Fail	Fail	Fail	Fail	Fail	Fail	Fail	Fail	Fail	Fail	Fail	Ixodes ricinus
DK	DK-237	14	Fail	Pass	Pass	Fail	Fail	Fail	Fail	Fail	Fail	Fail	Fail	Fail	Fail	Pass	Pass	Ixodes ricinus
DK	DK-237	15	Fail	Fail	Fail	Fail	Fail	Fail	Fail	Fail	Fail	Fail	Fail	Fail	Fail	Pass	Pass	Ixodes ricinus
DK	DK-237	16	Fail	Fail	Fail	Fail	Fail	Fail	Fail	Fail	Fail	Fail	Fail	Fail	Fail	Pass	Pass	Ixodes ricinus
DK	DK-237	17	Fail	Pass	Pass	Fail	Pass	Fail	Fail	Fail	Fail	Fail	Fail	Fail	Fail	Fail	Fail	Ixodes ricinus
DK	DK-237	18	Fail	Pass	Pass	Fail	Fail	Fail	Fail	Fail	Fail	Fail	Fail	Fail	Fail	Pass	Pass	Ixodes ricinus
DK	DK-237	19	Fail	Pass	Pass	Pass	Fail	Fail	Fail	Pass	Fail	Fail	Fail	Fail	Fail	Fail	Fail	Ixodes ricinus
DK	DK-237	20	Fail	Fail	Fail	Fail	Fail	Fail	Fail	Fail	Fail	Fail	Fail	Fail	Fail	Fail	Fail	Ixodes ricinus
DK	DK-237	21	Fail	Pass	Pass	Fail	Fail	Fail	Fail	Fail	Fail	Fail	Fail	Fail	Fail	Fail	Fail	Ixodes ricinus
DK	DK-237	22	Fail	Fail	Fail	Fail	Fail	Fail	Fail	Fail	Fail	Fail	Fail	Fail	Fail	Fail	Fail	Ixodes ricinus
DK	DK-237	23	Fail	Fail	Fail	Fail	Fail	Fail	Fail	Fail	Fail	Fail	Fail	Fail	Fail	Fail	Fail	Ixodes ricinus
DK	DK-237	24	Fail	Pass	Fail	Fail	Pass	Fail	Pass	Fail	Fail	Fail	Fail	Fail	Fail	Pass	Pass	Ixodes ricinus
DK	DK-237	25	Fail	Pass	Pass	Fail	Fail	Fail	Fail	Fail	Fail	Fail	Fail	Fail	Fail	Pass	Pass	Ixodes ricinus
DK	DK-237	26	Fail	Fail	Pass	Pass	Fail	Fail	Fail	Fail	Fail	Fail	Fail	Fail	Fail	Fail	Fail	Ixodes ricinus
DK	DK-237	27	Fail	Pass	Pass	Fail	Fail	Fail	Fail	Fail	Fail	Fail	Fail	Fail	Fail	Pass	Pass	Ixodes ricinus
DK	DK-237	28	Fail	Pass	Fail	Fail	Fail	Fail	Fail	Fail	Pass	Fail	Fail	Fail	Fail	Pass	Pass	Ixodes ricinus
DK	DK-237	29	Fail	Pass	Pass	Fail	Fail	Fail	Fail	Fail	Pass	Fail	Fail	Fail	Fail	Fail	Pass	Ixodes ricinus
DK	DK-237	30	Fail	Pass	Fail	Pass	Fail	Fail	Fail	Fail	Fail	Fail	Fail	Fail	Fail	Fail	Fail	Ixodes ricinus
DK	DK-237	31	Fail	Pass	Pass	Fail	Fail	Fail	Fail	Pass	Fail	Fail	Fail	Fail	Fail	Fail	Fail	Ixodes ricinus
DK	DK-237	32	Fail	Pass	Pass	Fail	Fail	Fail	Fail	Fail	Pass	Fail	Fail	Fail	Fail	Fail	Fail	Ixodes ricinus
DK	DK-237	33	Fail	Pass	Fail	Fail	Pass	Fail	Fail	Pass	Fail	Fail	Fail	Fail	Fail	Fail	Fail	Ixodes ricinus
DK	DK-237	34	Fail	Pass	Pass	Fail	Fail	Fail	Fail	Fail	Fail	Fail	Fail	Fail	Pass	Fail	Fail	Ixodes ricinus
DK	DK-237	35	Fail	Pass	Pass	Fail	Pass	Fail	Fail	Fail	Fail	Fail	Fail	Fail	Fail	Fail	Fail	Ixodes ricinus
DK	DK-237	36	Fail	Fail	Fail	Fail	Fail	Fail	Fail	Fail	Fail	Fail	Fail	Fail	Fail	Fail	Fail	Ixodes ricinus
DK	DK-237	37	Fail	Pass	Fail	Fail	Pass	Fail	Fail	Pass	Fail	Fail	Fail	Fail	Fail	Fail	Fail	Ixodes ricinus
DK	DK-237	38	Fail	Pass	Pass	Fail	Pass	Fail	Fail	Fail	Fail	Fail	Fail	Fail	Fail	Pass	Pass	Ixodes ricinus
DK	DK-237	39	Fail	Pass	Pass	Fail	Fail	Fail	Fail	Fail	Fail	Fail	Fail	Fail	Fail	Pass	Pass	Ixodes ricinus
DK	DK-237	40	Fail	Fail	Fail	Fail	Fail	Fail	Fail	Fail	Fail	Fail	Fail	Fail	Fail	Pass	Pass	Ixodes ricinus
DK	DK-237	41	Fail	Pass	Fail	Pass	Fail	Fail	Fail	Fail	Fail	Fail	Fail	Fail	Fail	Fail	Fail	Ixodes ricinus
DK	DK-237	42	Fail	Pass	Pass	Fail	Fail	Fail	Fail	Fail	Fail	Fail	Fail	Fail	Fail	Fail	Fail	Ixodes ricinus
DK	DK-237	43	Fail	Pass	Pass	Fail	Fail	Fail	Fail	Fail	Fail	Fail	Fail	Fail	Fail	Pass	Pass	Ixodes ricinus
DK	DK-237	44	Fail	Pass	Pass	Fail	Fail	Fail	Fail	Fail	Fail	Fail	Fail	Fail	Fail	Pass	Pass	Ixodes ricinus
DK	DK-237	45	Fail	Pass	Fail	Pass	Fail	Fail	Fail	Fail	Fail	Fail	Fail	Fail	Fail	Fail	Fail	Ixodes ricinus
DK	DK-237	46	Fail	Fail	Fail	Fail	Fail	Fail	Fail	Fail	Fail	Fail	Fail	Fail	Fail	Fail	Fail	Ixodes ricinus
DK	DK-237	47	Fail	Pass	Pass	Fail	Fail	Fail	Fail	Fail	Fail	Fail	Fail	Fail	Fail	Fail	Fail	Ixodes ricinus
DK	DK-237	48	Fail	Fail	Fail	Fail	Fail	Fail	Fail	Fail	Fail	Fail	Fail	Fail	Fail	Fail	Fail	Ixodes ricinus
DK	DK-237	49	Fail	Pass	Pass	Fail	Fail	Fail	Fail	Fail	Fail	Fail	Fail	Fail	Fail	Pass	Pass	Ixodes ricinus
DK	DK-237	50	Fail	Pass	Pass	Fail	Pass	Fail	Fail	Pass	Fail	Fail	Fail	Fail	Fail	Fail	Fail	Ixodes ricinus
DK	DK-237	51	Fail	Pass	Pass	Fail	Pass	Fail	Fail	Fail	Fail	Fail	Fail	Fail	Fail	Pass	Pass	Ixodes ricinus
DK	DK-237	52	Pass	Pass	Fail	Fail	Fail	Fail	Fail	Fail	Fail	Fail	Fail	Fail	Fail	Fail	Fail	Ixodes ricinus
DK	DK-237	53	Fail	Fail	Fail	Fail	Fail	Fail	Fail	Fail	Fail	Fail	Fail	Fail	Fail	Pass	Pass	Ixodes ricinus
DK	DK-237	54	Fail	Pass	Fail	Pass	Fail	Fail	Fail	Fail	Fail	Fail	Fail	Fail	Fail	Pass	Pass	Ixodes ricinus
DK	DK-237	55	Fail	Pass	Pass	Fail	Pass	Fail	Fail	Pass	Fail	Fail	Fail	Fail	Fail	Pass	Fail	Ixodes ricinus
DK	DK-237	56	Fail	Fail	Fail	Fail	Fail	Fail	Fail	Fail	Fail	Fail	Fail	Fail	Fail	Fail	Fail	Ixodes ricinus
DK	DK-237	57	Fail	Fail	Fail	Fail	Fail	Fail	Fail	Fail	Fail	Fail	Fail	Fail	Pass	Fail	Fail	Ixodes ricinus
DK	DK-237	58	Fail	Fail	Fail	Fail	Fail	Fail	Fail	Fail	Fail	Fail	Fail	Fail	Fail	Fail	Fail	Ixodes ricinus
DK	DK-237	59	Fail	Pass	Pass	Fail	Pass	Fail	Fail	Fail	Fail	Fail	Fail	Fail	Fail	Pass	Pass	Ixodes ricinus
DK	DK-237	60	Fail	Fail	Fail	Fail	Fail	Fail	Fail	Fail	Fail	Fail	Fail	Fail	Fail	Fail	Fail	Ixodes ricinus
DK	DK-240	1	Fail	Pass	Fail	Pass	Fail	Fail	Fail	Fail	Fail	Fail	Fail	Fail	Fail	Fail	Fail	Ixodes ricinus
DK	DK-240	2	Fail	Pass	Fail	Pass	Fail	Fail	Fail	Fail	Fail	Fail	Fail	Fail	Fail	Fail	Fail	Ixodes ricinus
DK	DK-240	3	Fail	Pass	Fail	Fail	Fail	Fail	Fail	Fail	Fail	Fail	Fail	Fail	Fail	Fail	Pass	Ixodes ricinus
DK	DK-240	4	Fail	Fail	Fail	Fail	Fail	Fail	Fail	Fail	Fail	Fail	Fail	Fail	Fail	Fail	Fail	Ixodes ricinus
DK	DK-240	5	Fail	Pass	Pass	Fail	Fail	Fail	Fail	Fail	Fail	Fail	Fail	Fail	Fail	Pass	Pass	Ixodes ricinus
DK	DK-240	6	Fail	Fail	Fail	Fail	Fail	Fail	Fail	Fail	Fail	Fail	Fail	Fail	Fail	Pass	Pass	Ixodes ricinus
DK	DK-240	7	Fail	Pass	Pass	Fail	Fail	Fail	Fail	Fail	Fail	Fail	Fail	Fail	Fail	Pass	Pass	Ixodes ricinus
DK	DK-240	8	Fail	Fail	Fail	Fail	Fail	Fail	Fail	Fail	Fail	Fail	Fail	Fail	Pass	Pass	Pass	Ixodes ricinus
DK	DK-240	9	Fail	Fail	Fail	Fail	Fail	Fail	Fail	Fail	Fail	Fail	Fail	Fail	Fail	Fail	Fail	Ixodes ricinus
DK	DK-240	10	Fail	Fail	Fail	Fail	Fail	Fail	Fail	Fail	Pass	Fail	Fail	Fail	Pass	Fail	Fail	Ixodes ricinus
DK	DK-240	11	Fail	Fail	Fail	Fail	Fail	Fail	Fail	Fail	Fail	Fail	Fail	Fail	Fail	Pass	Pass	Ixodes ricinus
DK	DK-240	12	Fail	Fail	Fail	Fail	Fail	Fail	Fail	Fail	Fail	Fail	Fail	Fail	Fail	Fail	Fail	Ixodes ricinus
DK	DK-240	13	Fail	Pass	Pass	Fail	Fail	Fail	Fail	Fail	Fail	Fail	Fail	Fail	Fail	Pass	Pass	Ixodes ricinus
DK	DK-240	14	Fail	Fail	Fail	Fail	Fail	Fail	Fail	Fail	Fail	Fail	Fail	Fail	Fail	Pass	Pass	Ixodes ricinus
DK	DK-240	15	Fail	Fail	Fail	Fail	Fail	Fail	Fail	Fail	Fail	Fail	Fail	Fail	Fail	Pass	Pass	Ixodes ricinus
DK	DK-240	16	Fail	Pass	Pass	Fail	Fail	Fail	Fail	Fail	Fail	Fail	Fail	Fail	Fail	Fail	Fail	Ixodes ricinus
DK	DK-240	17	Fail	Fail	Fail	Fail	Fail	Fail	Fail	Fail	Fail	Fail	Fail	Fail	Fail	Pass	Pass	Ixodes ricinus
DK	DK-240	18	Fail	Fail	Fail	Fail	Fail	Fail	Fail	Fail	Fail	Fail	Fail	Fail	Pass	Fail	Fail	Ixodes ricinus
DK	DK-240	19	Fail	Fail	Fail	Fail	Fail	Fail	Fail	Fail	Fail	Fail	Fail	Fail	Fail	Pass	Pass	Ixodes ricinus
DK	DK-240	20	Fail	Fail	Fail	Fail	Fail	Fail	Fail	Fail	Fail	Fail	Fail	Fail	Pass	Pass	Pass	Ixodes ricinus
DK	DK-240	21	Fail	Pass	Fail	Fail	Fail	Fail	Fail	Fail	Fail	Fail	Fail	Fail	Fail	Fail	Fail	Ixodes ricinus
DK	DK-240	22	Fail	Pass	Pass	Fail	Fail	Fail	Fail	Fail	Fail	Fail	Fail	Fail	Fail	Pass	Pass	Ixodes ricinus
DK	DK-240	23	Fail	Fail	Fail	Fail	Fail	Fail	Fail	Fail	Fail	Fail	Fail	Pass	Fail	Fail	Fail	Ixodes ricinus
DK	DK-240	24	Fail	Fail	Fail	Fail	Fail	Fail	Fail	Fail	Fail	Fail	Fail	Fail	Fail	Fail	Fail	Ixodes ricinus
DK	DK-240	25	Fail	Pass	Pass	Fail	Fail	Fail	Fail	Fail	Fail	Fail	Fail	Fail	Fail	Fail	Fail	Ixodes ricinus
DK	DK-240	26	Fail	Fail	Fail	Fail	Fail	Fail	Fail	Fail	Fail	Pass	Fail	Fail	Fail	Pass	Pass	Ixodes ricinus
DK	DK-240	27	Fail	Fail	Fail	Fail	Fail	Fail	Fail	Fail	Fail	Fail	Fail	Fail	Pass	Pass	Pass	Ixodes ricinus
DK	DK-240	28	Fail	Pass	Pass	Fail	Fail	Fail	Fail	Fail	Fail	Fail	Fail	Fail	Fail	Pass	Pass	Ixodes ricinus
DK	DK-240	29	Fail	Fail	Fail	Fail	Fail	Fail	Fail	Fail	Pass	Fail	Fail	Fail	Fail	Pass	Pass	Ixodes ricinus
DK	DK-240	30	Fail	Fail	Fail	Fail	Fail	Fail	Fail	Fail	Fail	Fail	Fail	Fail	Fail	Fail	Fail	Ixodes ricinus
DK	DK-240	31	Fail	Fail	Fail	Fail	Fail	Fail	Fail	Fail	Fail	Fail	Fail	Fail	Pass	Pass	Pass	Ixodes ricinus
DK	DK-240	32	Fail	Fail	Fail	Fail	Fail	Fail	Fail	Fail	Fail	Fail	Fail	Fail	Fail	Pass	Fail	Ixodes ricinus
DK	DK-240	33	Fail	Pass	Pass	Fail	Fail	Fail	Fail	Fail	Pass	Fail	Fail	Fail	Fail	Pass	Pass	Ixodes ricinus
DK	DK-240	34	Fail	Fail	Fail	Fail	Fail	Fail	Fail	Fail	Fail	Fail	Fail	Fail	Pass	Fail	Pass	Ixodes ricinus
DK	DK-240	35	Fail	Fail	Fail	Fail	Fail	Fail	Fail	Fail	Fail	Fail	Fail	Fail	Fail	Fail	Pass	Ixodes ricinus
DK	DK-240	36	Fail	Fail	Fail	Fail	Fail	Fail	Fail	Fail	Fail	Fail	Fail	Fail	Fail	Pass	Pass	Ixodes ricinus
DK	DK-240	37	Fail	Pass	Pass	Fail	Fail	Fail	Fail	Fail	Fail	Fail	Fail	Fail	Fail	Pass	Pass	Ixodes ricinus
DK	DK-240	38	Fail	Pass	Pass	Fail	Fail	Fail	Fail	Fail	Fail	Fail	Fail	Fail	Pass	Fail	Fail	Ixodes ricinus
DK	DK-240	39	Fail	Pass	Pass	Fail	Fail	Fail	Fail	Fail	Fail	Fail	Fail	Fail	Pass	Pass	Pass	Ixodes ricinus
DK	DK-240	40	Fail	Pass	Pass	Fail	Fail	Fail	Fail	Fail	Fail	Fail	Fail	Fail	Fail	Pass	Pass	Ixodes ricinus
DK	DK-240	41	Pass	Pass	Pass	Fail	Fail	Fail	Fail	Fail	Pass	Fail	Fail	Fail	Fail	Pass	Pass	Ixodes ricinus
DK	DK-240	42	Fail	Fail	Fail	Fail	Fail	Fail	Fail	Fail	Fail	Fail	Fail	Fail	Fail	Pass	Pass	Ixodes ricinus
DK	DK-240	43	Fail	Pass	Pass	Fail	Fail	Fail	Fail	Fail	Fail	Pass	Fail	Fail	Fail	Fail	Fail	Ixodes ricinus
DK	DK-240	44	Fail	Fail	Fail	Fail	Fail	Fail	Fail	Fail	Fail	Fail	Fail	Fail	Fail	Pass	Pass	Ixodes ricinus
DK	DK-240	45	Fail	Fail	Fail	Fail	Fail	Fail	Fail	Fail	Fail	Fail	Fail	Fail	Fail	Fail	Fail	Ixodes ricinus
DK	DK-240	46	Fail	Fail	Fail	Fail	Fail	Fail	Fail	Fail	Fail	Fail	Fail	Fail	Fail	Fail	Fail	Ixodes ricinus
DK	DK-240	47	Fail	Fail	Fail	Fail	Fail	Fail	Fail	Fail	Fail	Fail	Fail	Fail	Fail	Fail	Fail	Ixodes ricinus
DK	DK-240	48	Fail	Pass	Pass	Fail	Fail	Fail	Fail	Fail	Fail	Pass	Fail	Fail	Fail	Fail	Fail	Ixodes ricinus
DK	DK-240	49	Fail	Fail	Fail	Fail	Fail	Fail	Fail	Fail	Pass	Fail	Fail	Fail	Fail	Pass	Pass	Ixodes ricinus
DK	DK-240	50	Fail	Pass	Fail	Fail	Pass	Fail	Fail	Fail	Fail	Fail	Fail	Fail	Pass	Fail	Fail	Ixodes ricinus
DK	DK-240	51	Fail	Fail	Fail	Fail	Fail	Fail	Fail	Fail	Fail	Fail	Fail	Fail	Fail	Fail	Pass	Ixodes ricinus
DK	DK-240	52	Fail	Fail	Fail	Fail	Fail	Fail	Fail	Fail	Fail	Fail	Fail	Fail	Fail	Pass	Pass	Ixodes ricinus
DK	DK-240	53	Fail	Fail	Fail	Fail	Fail	Fail	Fail	Fail	Fail	Fail	Fail	Fail	Fail	Fail	Fail	Ixodes ricinus
DK	DK-240	54	Fail	Fail	Fail	Fail	Fail	Fail	Fail	Fail	Fail	Fail	Fail	Fail	Fail	Pass	Pass	Ixodes ricinus
DK	DK-240	55	Fail	Fail	Fail	Fail	Fail	Fail	Fail	Fail	Fail	Fail	Fail	Fail	Fail	Pass	Pass	Ixodes ricinus
DK	DK-240	56	Fail	Pass	Pass	Fail	Fail	Fail	Fail	Fail	Fail	Fail	Fail	Fail	Pass	Pass	Pass	Ixodes ricinus
DK	DK-240	57	Fail	Fail	Fail	Fail	Fail	Fail	Fail	Fail	Fail	Fail	Fail	Fail	Fail	Pass	Pass	Ixodes ricinus
DK	DK-240	58	Fail	Fail	Fail	Fail	Fail	Fail	Fail	Fail	Fail	Fail	Fail	Fail	Fail	Pass	Pass	Ixodes ricinus
DK	DK-240	59	Fail	Pass	Fail	Fail	Fail	Fail	Fail	Fail	Pass	Fail	Fail	Fail	Fail	Pass	Pass	Ixodes ricinus
DK	DK-240	60	Fail	Fail	Fail	Fail	Fail	Fail	Fail	Fail	Fail	Fail	Fail	Fail	Fail	Pass	Pass	Ixodes ricinus
DK	DK-482	1	Fail	Pass	Pass	Fail	Fail	Fail	Fail	Pass	Fail	Fail	Fail	Fail	Fail	Fail	Fail	Ixodes ricinus
DK	DK-482	2	Fail	Fail	Fail	Fail	Fail	Fail	Fail	Fail	Fail	Fail	Fail	Fail	Fail	Fail	Fail	Ixodes ricinus
DK	DK-482	3	Fail	Fail	Fail	Fail	Fail	Fail	Fail	Fail	Fail	Fail	Fail	Fail	Fail	Pass	Pass	Ixodes ricinus
DK	DK-482	4	Fail	Pass	Pass	Fail	Fail	Fail	Fail	Fail	Fail	Fail	Fail	Fail	Fail	Pass	Pass	Ixodes ricinus
DK	DK-482	5	Fail	Pass	Fail	Fail	Fail	Fail	Fail	Fail	Fail	Fail	Fail	Fail	Fail	Fail	Fail	Ixodes ricinus
DK	DK-482	6	Fail	Pass	Pass	Fail	Fail	Fail	Fail	Fail	Fail	Fail	Fail	Fail	Fail	Pass	Pass	Ixodes ricinus
DK	DK-482	7	Fail	Fail	Fail	Fail	Fail	Fail	Fail	Fail	Fail	Fail	Fail	Fail	Fail	Pass	Pass	Ixodes ricinus
DK	DK-482	8	Fail	Fail	Fail	Fail	Fail	Fail	Fail	Fail	Pass	Fail	Fail	Fail	Fail	Fail	Fail	Ixodes ricinus
DK	DK-482	9	Fail	Pass	Fail	Fail	Fail	Fail	Pass	Fail	Pass	Fail	Fail	Fail	Fail	Pass	Pass	Ixodes ricinus
DK	DK-482	10	Fail	Fail	Fail	Fail	Fail	Fail	Fail	Fail	Fail	Fail	Fail	Fail	Fail	Fail	Fail	Ixodes ricinus
DK	DK-482	11	Fail	Fail	Fail	Fail	Fail	Fail	Fail	Fail	Fail	Fail	Fail	Pass	Pass	Pass	Pass	Ixodes ricinus
DK	DK-482	12	Fail	Fail	Fail	Fail	Fail	Fail	Fail	Fail	Fail	Fail	Fail	Fail	Fail	Fail	Fail	Ixodes ricinus
DK	DK-482	13	Fail	Fail	Fail	Fail	Fail	Fail	Fail	Fail	Fail	Fail	Fail	Fail	Fail	Pass	Pass	Ixodes ricinus
DK	DK-482	14	Fail	Pass	Pass	Fail	Fail	Fail	Fail	Pass	Fail	Fail	Fail	Fail	Pass	Pass	Pass	Ixodes ricinus
DK	DK-482	15	Fail	Fail	Fail	Fail	Fail	Fail	Fail	Fail	Fail	Fail	Fail	Fail	Fail	Fail	Fail	Ixodes ricinus
DK	DK-482	16	Fail	Fail	Fail	Fail	Fail	Fail	Fail	Fail	Fail	Fail	Fail	Fail	Fail	Pass	Pass	Ixodes ricinus
DK	DK-482	17	Fail	Fail	Fail	Fail	Fail	Fail	Fail	Fail	Fail	Fail	Fail	Fail	Fail	Pass	Pass	Ixodes ricinus
DK	DK-482	18	Fail	Pass	Fail	Fail	Fail	Fail	Fail	Fail	Fail	Fail	Fail	Fail	Pass	Fail	Fail	Ixodes ricinus
DK	DK-482	19	Fail	Fail	Fail	Fail	Fail	Fail	Fail	Fail	Fail	Fail	Fail	Fail	Fail	Pass	Pass	Ixodes ricinus
DK	DK-482	20	Fail	Pass	Pass	Pass	Fail	Fail	Fail	Fail	Fail	Fail	Fail	Fail	Fail	Pass	Pass	Ixodes ricinus
DK	DK-482	21	Fail	Pass	Pass	Fail	Fail	Fail	Fail	Fail	Fail	Fail	Fail	Fail	Fail	Fail	Fail	Ixodes ricinus
DK	DK-482	22	Fail	Pass	Fail	Pass	Fail	Fail	Fail	Fail	Fail	Fail	Fail	Fail	Fail	Pass	Pass	Ixodes ricinus
DK	DK-482	23	Fail	Pass	Pass	Fail	Fail	Fail	Fail	Fail	Fail	Fail	Fail	Fail	Fail	Pass	Pass	Ixodes ricinus
DK	DK-482	24	Fail	Fail	Fail	Fail	Fail	Fail	Fail	Fail	Fail	Fail	Fail	Fail	Fail	Pass	Pass	Ixodes ricinus
DK	DK-482	25	Fail	Pass	Pass	Fail	Fail	Fail	Pass	Fail	Fail	Fail	Fail	Fail	Pass	Fail	Fail	Ixodes ricinus
DK	DK-482	26	Fail	Fail	Fail	Fail	Fail	Fail	Fail	Fail	Fail	Fail	Fail	Fail	Fail	Pass	Pass	Ixodes ricinus
DK	DK-482	27	Fail	Pass	Fail	Fail	Fail	Fail	Pass	Fail	Fail	Fail	Fail	Fail	Fail	Fail	Fail	Ixodes ricinus
DK	DK-482	28	Fail	Pass	Fail	Fail	Fail	Fail	Pass	Fail	Pass	Fail	Fail	Fail	Fail	Pass	Pass	Ixodes ricinus
DK	DK-482	29	Fail	Pass	Fail	Fail	Fail	Fail	Pass	Fail	Fail	Fail	Fail	Pass	Fail	Fail	Fail	Ixodes ricinus
DK	DK-482	30	Fail	Pass	Fail	Fail	Pass	Fail	Fail	Pass	Fail	Fail	Fail	Fail	Fail	Pass	Pass	Ixodes ricinus
DK	DK-482	31	Fail	Pass	Fail	Fail	Fail	Fail	Pass	Fail	Fail	Fail	Fail	Fail	Fail	Pass	Pass	Ixodes ricinus
DK	DK-482	32	Fail	Fail	Fail	Fail	Fail	Fail	Fail	Fail	Pass	Fail	Fail	Fail	Fail	Fail	Fail	Ixodes ricinus
DK	DK-482	33	Fail	Fail	Fail	Fail	Fail	Fail	Fail	Fail	Fail	Fail	Fail	Fail	Fail	Pass	Pass	Ixodes ricinus
DK	DK-482	34	Fail	Fail	Fail	Fail	Fail	Fail	Fail	Fail	Fail	Pass	Fail	Fail	Fail	Fail	Fail	Ixodes ricinus
DK	DK-482	35	Fail	Pass	Fail	Fail	Fail	Fail	Pass	Fail	Fail	Fail	Fail	Fail	Fail	Pass	Pass	Ixodes ricinus
DK	DK-482	36	Fail	Fail	Fail	Fail	Fail	Fail	Fail	Fail	Fail	Fail	Fail	Pass	Fail	Pass	Pass	Ixodes ricinus
DK	DK-482	37	Fail	Fail	Fail	Fail	Fail	Fail	Fail	Fail	Fail	Fail	Fail	Fail	Fail	Pass	Pass	Ixodes ricinus
DK	DK-482	38	Fail	Pass	Pass	Fail	Fail	Fail	Pass	Fail	Fail	Fail	Fail	Fail	Pass	Fail	Fail	Ixodes ricinus
DK	DK-482	39	Fail	Pass	Pass	Fail	Fail	Fail	Fail	Fail	Fail	Fail	Fail	Fail	Fail	Pass	Pass	Ixodes ricinus
DK	DK-482	40	Fail	Pass	Fail	Pass	Fail	Fail	Fail	Fail	Fail	Fail	Fail	Fail	Fail	Fail	Fail	Ixodes ricinus
DK	DK-482	41	Fail	Pass	Fail	Fail	Fail	Fail	Fail	Fail	Fail	Fail	Fail	Fail	Fail	Fail	Fail	Ixodes ricinus
DK	DK-482	42	Fail	Pass	Fail	Fail	Fail	Fail	Pass	Fail	Pass	Fail	Fail	Fail	Fail	Pass	Pass	Ixodes ricinus
DK	DK-482	43	Fail	Pass	Pass	Fail	Fail	Fail	Pass	Fail	Fail	Fail	Fail	Fail	Fail	Fail	Fail	Ixodes ricinus
DK	DK-482	44	Fail	Pass	Fail	Fail	Fail	Fail	Pass	Fail	Fail	Fail	Fail	Fail	Fail	Pass	Pass	Ixodes ricinus
DK	DK-482	45	Pass	Pass	Fail	Fail	Fail	Fail	Fail	Fail	Fail	Fail	Fail	Fail	Fail	Pass	Pass	Ixodes ricinus
DK	DK-482	46	Fail	Fail	Fail	Fail	Fail	Fail	Fail	Fail	Fail	Fail	Fail	Fail	Fail	Pass	Fail	Ixodes ricinus
DK	DK-482	47	Fail	Pass	Pass	Fail	Fail	Fail	Fail	Fail	Pass	Fail	Fail	Fail	Fail	Pass	Pass	Ixodes ricinus
DK	DK-482	48	Fail	Pass	Pass	Fail	Fail	Fail	Fail	Fail	Fail	Fail	Fail	Fail	Fail	Fail	Fail	Ixodes ricinus
DK	DK-482	49	Fail	Pass	Fail	Fail	Fail	Fail	Pass	Fail	Fail	Fail	Fail	Fail	Fail	Pass	Pass	Ixodes ricinus
DK	DK-482	50	Fail	Pass	Pass	Fail	Fail	Fail	Fail	Fail	Fail	Fail	Fail	Fail	Fail	Pass	Pass	Ixodes ricinus
DK	DK-482	51	Fail	Pass	Pass	Fail	Fail	Fail	Fail	Fail	Fail	Fail	Fail	Fail	Fail	Pass	Pass	Ixodes ricinus
DK	DK-482	52	Fail	Pass	Pass	Fail	Pass	Fail	Fail	Fail	Pass	Fail	Fail	Fail	Pass	Pass	Pass	Ixodes ricinus
DK	DK-482	53	Fail	Pass	Fail	Fail	Fail	Fail	Fail	Pass	Fail	Fail	Fail	Fail	Fail	Pass	Pass	Ixodes ricinus
DK	DK-482	54	Fail	Pass	Fail	Fail	Fail	Fail	Pass	Fail	Fail	Fail	Fail	Fail	Fail	Fail	Fail	Ixodes ricinus
DK	DK-482	55	Fail	Pass	Fail	Fail	Pass	Fail	Pass	Fail	Fail	Fail	Fail	Fail	Fail	Fail	Fail	Ixodes ricinus
DK	DK-482	56	Fail	Fail	Fail	Fail	Fail	Fail	Fail	Fail	Fail	Fail	Fail	Fail	Fail	Pass	Pass	Ixodes ricinus
DK	DK-482	57	Fail	Pass	Fail	Fail	Fail	Fail	Pass	Fail	Fail	Fail	Fail	Fail	Fail	Fail	Fail	Ixodes ricinus
DK	DK-483	1	Fail	Pass	Pass	Fail	Fail	Fail	Fail	Fail	Fail	Fail	Fail	Fail	Fail	Fail	Fail	Ixodes ricinus
DK	DK-483	2	Fail	Pass	Pass	Fail	Fail	Fail	Fail	Fail	Fail	Fail	Fail	Fail	Fail	Fail	Fail	Ixodes ricinus
DK	DK-483	3	Fail	Fail	Fail	Fail	Fail	Fail	Fail	Fail	Fail	Fail	Fail	Fail	Fail	Fail	Fail	Ixodes ricinus
DK	DK-483	4	Fail	Pass	Pass	Fail	Fail	Fail	Fail	Fail	Fail	Fail	Fail	Fail	Fail	Fail	Fail	Ixodes ricinus
DK	DK-483	5	Fail	Pass	Pass	Fail	Fail	Fail	Fail	Fail	Fail	Fail	Fail	Fail	Fail	Fail	Fail	Ixodes ricinus
DK	DK-483	6	Fail	Fail	Fail	Fail	Fail	Fail	Fail	Fail	Fail	Fail	Fail	Fail	Fail	Fail	Fail	Ixodes ricinus
DK	DK-483	7	Fail	Fail	Fail	Fail	Fail	Fail	Fail	Fail	Fail	Fail	Fail	Fail	Fail	Pass	Pass	Ixodes ricinus
DK	DK-483	8	Fail	Pass	Pass	Fail	Fail	Fail	Fail	Fail	Fail	Fail	Fail	Fail	Fail	Fail	Fail	Ixodes ricinus
DK	DK-483	9	Fail	Fail	Fail	Fail	Fail	Fail	Fail	Fail	Fail	Fail	Fail	Fail	Fail	Fail	Fail	Ixodes ricinus
DK	DK-483	10	Fail	Fail	Fail	Fail	Fail	Fail	Fail	Fail	Fail	Fail	Fail	Fail	Fail	Pass	Pass	Ixodes ricinus
DK	DK-483	11	Fail	Pass	Pass	Fail	Fail	Fail	Fail	Fail	Fail	Fail	Fail	Fail	Fail	Fail	Fail	Ixodes ricinus
DK	DK-483	12	Fail	Fail	Fail	Fail	Fail	Fail	Fail	Fail	Fail	Fail	Fail	Fail	Fail	Fail	Fail	Ixodes ricinus
DK	DK-483	13	Fail	Pass	Pass	Fail	Fail	Fail	Fail	Fail	Fail	Fail	Fail	Fail	Fail	Pass	Pass	Ixodes ricinus
DK	DK-483	14	Fail	Fail	Fail	Fail	Fail	Fail	Fail	Fail	Fail	Fail	Fail	Fail	Fail	Fail	Fail	Ixodes ricinus
DK	DK-483	15	Fail	Pass	Pass	Fail	Fail	Fail	Fail	Fail	Fail	Fail	Fail	Fail	Fail	Fail	Fail	Ixodes ricinus
DK	DK-483	16	Fail	Pass	Pass	Fail	Pass	Fail	Fail	Fail	Fail	Fail	Fail	Fail	Fail	Pass	Pass	Ixodes ricinus
DK	DK-483	17	Fail	Pass	Pass	Fail	Fail	Fail	Fail	Fail	Fail	Fail	Fail	Fail	Fail	Fail	Fail	Ixodes ricinus
DK	DK-483	18	Fail	Pass	Pass	Fail	Fail	Fail	Fail	Fail	Fail	Fail	Fail	Fail	Pass	Fail	Fail	Ixodes ricinus
DK	DK-483	19	Fail	Pass	Pass	Fail	Pass	Fail	Fail	Fail	Fail	Fail	Fail	Fail	Fail	Fail	Fail	Ixodes ricinus
DK	DK-483	20	Fail	Fail	Fail	Fail	Fail	Fail	Fail	Fail	Fail	Fail	Fail	Fail	Fail	Pass	Pass	Ixodes ricinus
DK	DK-483	21	Fail	Pass	Fail	Fail	Pass	Fail	Fail	Fail	Fail	Fail	Fail	Fail	Fail	Pass	Pass	Ixodes ricinus
DK	DK-483	22	Fail	Pass	Pass	Fail	Fail	Fail	Fail	Fail	Fail	Fail	Fail	Fail	Pass	Pass	Pass	Ixodes ricinus
DK	DK-483	23	Fail	Pass	Fail	Fail	Fail	Fail	Fail	Fail	Fail	Fail	Fail	Fail	Pass	Fail	Fail	Ixodes ricinus
DK	DK-483	24	Fail	Pass	Fail	Fail	Fail	Fail	Fail	Fail	Fail	Fail	Fail	Fail	Fail	Pass	Pass	Ixodes ricinus
DK	DK-483	25	Fail	Pass	Pass	Fail	Fail	Fail	Fail	Fail	Fail	Fail	Fail	Fail	Fail	Pass	Pass	Ixodes ricinus
DK	DK-483	26	Fail	Pass	Pass	Fail	Fail	Fail	Fail	Fail	Fail	Fail	Fail	Fail	Fail	Pass	Pass	Ixodes ricinus
DK	DK-483	27	Fail	Pass	Pass	Fail	Fail	Fail	Fail	Fail	Fail	Fail	Fail	Fail	Fail	Pass	Pass	Ixodes ricinus
DK	DK-483	28	Fail	Pass	Pass	Fail	Fail	Fail	Fail	Fail	Fail	Fail	Fail	Fail	Fail	Fail	Fail	Ixodes ricinus
DK	DK-483	29	Fail	Pass	Pass	Fail	Pass	Fail	Fail	Fail	Fail	Fail	Fail	Fail	Fail	Pass	Pass	Ixodes ricinus
DK	DK-483	30	Fail	Pass	Pass	Fail	Pass	Fail	Fail	Fail	Fail	Fail	Fail	Fail	Fail	Pass	Pass	Ixodes ricinus
DK	DK-483	31	Fail	Pass	Pass	Fail	Fail	Fail	Fail	Fail	Fail	Fail	Fail	Fail	Fail	Pass	Pass	Ixodes ricinus
DK	DK-483	32	Fail	Pass	Pass	Fail	Fail	Fail	Fail	Fail	Fail	Fail	Fail	Fail	Fail	Fail	Fail	Ixodes ricinus
DK	DK-483	33	Fail	Fail	Fail	Fail	Fail	Fail	Fail	Fail	Fail	Fail	Fail	Fail	Fail	Pass	Pass	Ixodes ricinus
DK	DK-483	34	Fail	Pass	Pass	Fail	Fail	Fail	Fail	Fail	Fail	Fail	Fail	Fail	Fail	Fail	Fail	Ixodes ricinus
DK	DK-483	35	Fail	Pass	Pass	Fail	Fail	Fail	Fail	Fail	Fail	Fail	Fail	Fail	Pass	Fail	Fail	Ixodes ricinus
DK	DK-483	36	Fail	Pass	Pass	Fail	Fail	Fail	Fail	Fail	Fail	Fail	Fail	Fail	Fail	Pass	Pass	Ixodes ricinus
DK	DK-483	37	Fail	Pass	Pass	Fail	Pass	Fail	Pass	Fail	Fail	Fail	Fail	Fail	Fail	Fail	Fail	Ixodes ricinus
DK	DK-483	38	Fail	Pass	Pass	Fail	Fail	Fail	Fail	Fail	Fail	Fail	Fail	Fail	Fail	Pass	Pass	Ixodes ricinus
DK	DK-483	39	Fail	Pass	Pass	Fail	Pass	Fail	Fail	Fail	Fail	Fail	Fail	Fail	Fail	Fail	Fail	Ixodes ricinus
DK	DK-483	40	Fail	Fail	Fail	Fail	Fail	Fail	Fail	Fail	Fail	Fail	Fail	Fail	Fail	Pass	Pass	Ixodes ricinus
DK	DK-483	41	Fail	Pass	Pass	Fail	Pass	Fail	Fail	Fail	Fail	Pass	Fail	Fail	Pass	Pass	Pass	Ixodes ricinus
DK	DK-483	42	Fail	Pass	Pass	Fail	Fail	Fail	Fail	Fail	Fail	Fail	Fail	Fail	Pass	Pass	Fail	Ixodes ricinus
DK	DK-483	43	Fail	Fail	Fail	Fail	Fail	Fail	Fail	Fail	Fail	Fail	Fail	Fail	Pass	Pass	Fail	Ixodes ricinus
DK	DK-483	44	Fail	Pass	Pass	Fail	Fail	Fail	Fail	Fail	Pass	Fail	Fail	Fail	Fail	Fail	Fail	Ixodes ricinus
DK	DK-483	45	Fail	Pass	Pass	Fail	Fail	Fail	Fail	Fail	Fail	Fail	Fail	Fail	Fail	Fail	Fail	Ixodes ricinus
DK	DK-483	46	Fail	Pass	Pass	Fail	Fail	Fail	Fail	Fail	Fail	Fail	Fail	Fail	Pass	Fail	Fail	Ixodes ricinus
DK	DK-483	47	Fail	Pass	Pass	Fail	Fail	Fail	Fail	Fail	Fail	Fail	Fail	Fail	Fail	Fail	Fail	Ixodes ricinus
DK	DK-483	48	Fail	Pass	Pass	Fail	Pass	Fail	Fail	Fail	Fail	Fail	Fail	Fail	Fail	Fail	Fail	Ixodes ricinus
DK	DK-483	49	Fail	Pass	Pass	Fail	Pass	Fail	Fail	Fail	Fail	Fail	Fail	Fail	Fail	Fail	Fail	Ixodes ricinus
DK	DK-483	50	Fail	Pass	Pass	Fail	Fail	Fail	Fail	Fail	Fail	Fail	Fail	Fail	Fail	Pass	Pass	Ixodes ricinus
DK	DK-483	51	Fail	Pass	Pass	Fail	Fail	Fail	Fail	Fail	Fail	Fail	Fail	Fail	Fail	Fail	Fail	Ixodes ricinus
DK	DK-483	52	Fail	Pass	Pass	Fail	Fail	Fail	Fail	Fail	Fail	Fail	Fail	Fail	Fail	Fail	Fail	Ixodes ricinus
DK	DK-483	53	Fail	Pass	Pass	Fail	Fail	Fail	Fail	Fail	Fail	Fail	Fail	Fail	Fail	Fail	Fail	Ixodes ricinus
DK	DK-483	54	Pass	Pass	Pass	Fail	Fail	Fail	Fail	Fail	Fail	Fail	Fail	Fail	Fail	Pass	Pass	Ixodes ricinus
DK	DK-483	55	Fail	Pass	Pass	Fail	Fail	Fail	Fail	Fail	Fail	Fail	Fail	Fail	Fail	Fail	Fail	Ixodes ricinus
DK	DK-483	56	Fail	Pass	Pass	Fail	Fail	Fail	Fail	Fail	Fail	Fail	Fail	Fail	Fail	Fail	Fail	Ixodes ricinus
DK	DK-483	57	Fail	Pass	Pass	Fail	Fail	Fail	Fail	Fail	Fail	Fail	Fail	Fail	Fail	Pass	Pass	Ixodes ricinus
DK	DK-483	58	Fail	Pass	Pass	Fail	Fail	Fail	Fail	Fail	Pass	Fail	Fail	Fail	Pass	Fail	Fail	Ixodes ricinus
DK	DK-483	59	Fail	Pass	Pass	Fail	Fail	Fail	Fail	Fail	Fail	Fail	Fail	Fail	Fail	Fail	Fail	Ixodes ricinus
DK	DK-483	60	Fail	Pass	Pass	Fail	Fail	Fail	Fail	Fail	Fail	Fail	Fail	Fail	Pass	Fail	Fail	Ixodes ricinus
DK	DK-484	1	Fail	Fail	Fail	Fail	Fail	Fail	Fail	Fail	Fail	Fail	Fail	Fail	Fail	Pass	Pass	Ixodes ricinus
DK	DK-484	2	Fail	Pass	Fail	Pass	Pass	Fail	Fail	Pass	Fail	Fail	Fail	Fail	Fail	Fail	Fail	Ixodes ricinus
DK	DK-484	3	Fail	Fail	Fail	Fail	Fail	Fail	Fail	Fail	Pass	Fail	Fail	Fail	Fail	Fail	Fail	Ixodes ricinus
DK	DK-484	4	Fail	Fail	Fail	Fail	Fail	Fail	Fail	Fail	Fail	Fail	Fail	Fail	Fail	Fail	Fail	Ixodes ricinus
DK	DK-484	5	Fail	Fail	Fail	Fail	Fail	Fail	Fail	Fail	Fail	Fail	Fail	Fail	Fail	Fail	Fail	Ixodes ricinus
DK	DK-484	6	Fail	Fail	Fail	Fail	Fail	Fail	Fail	Fail	Fail	Fail	Fail	Fail	Fail	Pass	Pass	Ixodes ricinus
DK	DK-484	7	Fail	Pass	Pass	Fail	Fail	Fail	Fail	Fail	Fail	Fail	Fail	Fail	Fail	Fail	Fail	Ixodes ricinus
DK	DK-484	8	Fail	Pass	Pass	Fail	Fail	Fail	Fail	Fail	Pass	Fail	Fail	Fail	Fail	Fail	Fail	Ixodes ricinus
DK	DK-484	9	Fail	Fail	Fail	Fail	Fail	Fail	Fail	Fail	Fail	Fail	Fail	Fail	Fail	Fail	Fail	Ixodes ricinus
DK	DK-484	10	Fail	Fail	Fail	Fail	Fail	Fail	Fail	Fail	Fail	Fail	Fail	Fail	Fail	Pass	Pass	Ixodes ricinus
DK	DK-484	11	Fail	Pass	Fail	Fail	Pass	Fail	Fail	Fail	Fail	Fail	Fail	Fail	Fail	Pass	Pass	Ixodes ricinus
DK	DK-484	12	Fail	Pass	Fail	Fail	Pass	Fail	Pass	Fail	Fail	Fail	Fail	Fail	Fail	Fail	Fail	Ixodes ricinus
DK	DK-484	13	Fail	Fail	Fail	Fail	Fail	Fail	Fail	Fail	Fail	Fail	Fail	Fail	Fail	Pass	Pass	Ixodes ricinus
DK	DK-484	14	Pass	Pass	Fail	Fail	Fail	Fail	Fail	Fail	Fail	Fail	Fail	Fail	Fail	Fail	Fail	Ixodes ricinus
DK	DK-484	15	Fail	Fail	Fail	Fail	Fail	Fail	Fail	Fail	Fail	Fail	Fail	Fail	Fail	Fail	Fail	Ixodes ricinus
DK	DK-484	16	Fail	Pass	Pass	Fail	Fail	Fail	Fail	Pass	Fail	Fail	Fail	Fail	Fail	Pass	Pass	Ixodes ricinus
DK	DK-484	17	Fail	Fail	Fail	Fail	Fail	Fail	Fail	Fail	Fail	Fail	Fail	Fail	Fail	Pass	Fail	Ixodes ricinus
DK	DK-484	18	Fail	Fail	Fail	Fail	Fail	Fail	Fail	Fail	Fail	Fail	Fail	Fail	Fail	Pass	Pass	Ixodes ricinus
DK	DK-484	19	Fail	Fail	Fail	Fail	Fail	Fail	Fail	Fail	Fail	Fail	Fail	Fail	Fail	Fail	Fail	Ixodes ricinus
DK	DK-484	20	Fail	Fail	Fail	Fail	Fail	Fail	Fail	Fail	Fail	Fail	Fail	Fail	Fail	Pass	Pass	Ixodes ricinus
DK	DK-484	21	Fail	Fail	Fail	Fail	Fail	Fail	Fail	Fail	Fail	Fail	Fail	Fail	Fail	Fail	Fail	Ixodes ricinus
DK	DK-484	22	Fail	Pass	Fail	Fail	Fail	Fail	Fail	Pass	Fail	Fail	Fail	Fail	Fail	Fail	Fail	Ixodes ricinus
DK	DK-484	23	Fail	Fail	Fail	Fail	Fail	Fail	Fail	Fail	Pass	Fail	Fail	Fail	Fail	Fail	Fail	Ixodes ricinus
DK	DK-484	24	Fail	Fail	Fail	Fail	Fail	Fail	Fail	Fail	Fail	Fail	Fail	Fail	Fail	Fail	Fail	Ixodes ricinus
DK	DK-484	25	Fail	Fail	Fail	Fail	Fail	Fail	Fail	Fail	Pass	Fail	Fail	Fail	Fail	Fail	Fail	Ixodes ricinus
DK	DK-484	26	Fail	Fail	Fail	Fail	Fail	Fail	Fail	Fail	Fail	Fail	Fail	Fail	Fail	Fail	Fail	Ixodes ricinus
DK	DK-484	27	Fail	Fail	Fail	Fail	Fail	Fail	Fail	Fail	Fail	Fail	Fail	Fail	Fail	Fail	Fail	Ixodes ricinus
DK	DK-484	28	Fail	Pass	Fail	Pass	Fail	Fail	Fail	Fail	Pass	Fail	Fail	Fail	Fail	Pass	Pass	Ixodes ricinus
DK	DK-484	29	Fail	Fail	Fail	Fail	Fail	Fail	Fail	Fail	Fail	Fail	Fail	Fail	Fail	Fail	Fail	Ixodes ricinus
DK	DK-484	30	Fail	Fail	Fail	Fail	Fail	Fail	Fail	Fail	Fail	Fail	Fail	Fail	Fail	Pass	Pass	Ixodes ricinus
DK	DK-484	31	Fail	Fail	Fail	Fail	Fail	Fail	Fail	Fail	Pass	Fail	Fail	Fail	Fail	Fail	Fail	Ixodes ricinus
DK	DK-484	32	Fail	Pass	Fail	Pass	Fail	Fail	Fail	Fail	Fail	Fail	Fail	Fail	Fail	Fail	Fail	Ixodes ricinus
DK	DK-484	33	Fail	Fail	Fail	Fail	Fail	Fail	Fail	Fail	Fail	Fail	Fail	Fail	Fail	Fail	Fail	Ixodes ricinus
DK	DK-484	34	Fail	Fail	Fail	Fail	Fail	Fail	Fail	Fail	Fail	Fail	Fail	Fail	Fail	Fail	Fail	Ixodes ricinus
DK	DK-484	35	Fail	Pass	Fail	Fail	Fail	Fail	Fail	Pass	Fail	Fail	Fail	Fail	Fail	Pass	Pass	Ixodes ricinus
DK	DK-484	36	Fail	Fail	Fail	Fail	Fail	Fail	Fail	Fail	Pass	Fail	Fail	Fail	Fail	Fail	Fail	Ixodes ricinus
DK	DK-484	37	Fail	Fail	Fail	Fail	Fail	Fail	Fail	Fail	Fail	Fail	Fail	Fail	Fail	Fail	Fail	Ixodes ricinus
DK	DK-484	38	Fail	Fail	Fail	Fail	Fail	Fail	Fail	Fail	Fail	Fail	Fail	Fail	Fail	Pass	Pass	Ixodes ricinus
DK	DK-484	39	Fail	Pass	Pass	Pass	Fail	Fail	Fail	Fail	Fail	Fail	Fail	Fail	Fail	Fail	Fail	Ixodes ricinus
DK	DK-484	40	Fail	Pass	Fail	Fail	Fail	Fail	Fail	Fail	Fail	Fail	Fail	Fail	Fail	Pass	Pass	Ixodes ricinus
DK	DK-484	41	Fail	Pass	Pass	Fail	Fail	Fail	Fail	Fail	Fail	Fail	Fail	Fail	Fail	Fail	Fail	Ixodes ricinus
DK	DK-484	42	Fail	Fail	Fail	Fail	Fail	Fail	Fail	Fail	Fail	Fail	Fail	Fail	Fail	Pass	Pass	Ixodes ricinus
DK	DK-484	43	Fail	Pass	Fail	Fail	Pass	Fail	Pass	Fail	Fail	Fail	Fail	Fail	Fail	Pass	Pass	Ixodes ricinus
DK	DK-484	44	Fail	Fail	Fail	Fail	Fail	Fail	Fail	Fail	Pass	Fail	Fail	Fail	Fail	Fail	Fail	Ixodes ricinus
DK	DK-484	45	Fail	Fail	Fail	Fail	Fail	Fail	Fail	Fail	Pass	Fail	Fail	Fail	Fail	Pass	Pass	Ixodes ricinus
DK	DK-484	46	Fail	Pass	Fail	Pass	Fail	Fail	Fail	Fail	Fail	Pass	Fail	Fail	Fail	Pass	Pass	Ixodes ricinus
DK	DK-484	47	Fail	Fail	Fail	Fail	Fail	Fail	Fail	Fail	Fail	Fail	Fail	Fail	Fail	Fail	Fail	Ixodes ricinus
DK	DK-484	48	Fail	Fail	Fail	Fail	Fail	Fail	Fail	Fail	Pass	Fail	Fail	Fail	Fail	Pass	Pass	Ixodes ricinus
DK	DK-484	49	Fail	Pass	Fail	Pass	Fail	Fail	Fail	Fail	Pass	Fail	Fail	Fail	Fail	Pass	Pass	Ixodes ricinus
DK	DK-484	50	Fail	Fail	Fail	Fail	Fail	Fail	Fail	Fail	Fail	Fail	Fail	Fail	Fail	Pass	Pass	Ixodes ricinus
DK	DK-484	51	Fail	Fail	Fail	Fail	Fail	Fail	Fail	Fail	Pass	Fail	Fail	Fail	Fail	Fail	Fail	Ixodes ricinus
DK	DK-484	52	Fail	Fail	Fail	Fail	Fail	Fail	Fail	Fail	Pass	Fail	Fail	Fail	Fail	Fail	Fail	Ixodes ricinus
DK	DK-484	53	Fail	Pass	Fail	Pass	Fail	Fail	Fail	Fail	Fail	Fail	Fail	Fail	Fail	Fail	Fail	Ixodes ricinus
DK	DK-484	54	Fail	Fail	Fail	Fail	Fail	Fail	Fail	Fail	Fail	Fail	Fail	Fail	Fail	Fail	Fail	Ixodes ricinus
DK	DK-484	55	Fail	Fail	Fail	Fail	Fail	Fail	Fail	Fail	Pass	Fail	Fail	Fail	Fail	Fail	Fail	Ixodes ricinus
DK	DK-484	56	Fail	Fail	Fail	Fail	Fail	Fail	Fail	Fail	Fail	Fail	Fail	Fail	Fail	Fail	Fail	Ixodes ricinus
DK	DK-484	57	Fail	Fail	Fail	Fail	Fail	Fail	Fail	Fail	Fail	Fail	Fail	Fail	Fail	Fail	Fail	Ixodes ricinus
DK	DK-484	58	Fail	Pass	Pass	Fail	Fail	Fail	Fail	Fail	Fail	Fail	Fail	Fail	Fail	Fail	Pass	Ixodes ricinus
DK	DK-484	59	Fail	Fail	Fail	Fail	Fail	Fail	Fail	Fail	Fail	Fail	Fail	Fail	Fail	Pass	Pass	Ixodes ricinus
DK	DK-484	60	Fail	Pass	Fail	Pass	Fail	Fail	Fail	Pass	Fail	Fail	Fail	Fail	Fail	Pass	Pass	Ixodes ricinus
DK	DK-485	1	Fail	Pass	Fail	Fail	Pass	Fail	Pass	Fail	Fail	Fail	Fail	Fail	Fail	Fail	Fail	Ixodes ricinus
DK	DK-485	2	Fail	Pass	Pass	Fail	Pass	Fail	Fail	Pass	Fail	Fail	Fail	Fail	Pass	Pass	Pass	Ixodes ricinus
DK	DK-485	3	Fail	Pass	Fail	Fail	Pass	Fail	Pass	Pass	Fail	Fail	Fail	Fail	Fail	Pass	Pass	Ixodes ricinus
DK	DK-485	4	Fail	Pass	Fail	Fail	Pass	Fail	Fail	Pass	Fail	Fail	Fail	Fail	Fail	Fail	Fail	Ixodes ricinus
DK	DK-485	5	Fail	Pass	Fail	Pass	Fail	Fail	Fail	Fail	Fail	Fail	Fail	Fail	Fail	Pass	Pass	Ixodes ricinus
DK	DK-485	6	Fail	Pass	Fail	Fail	Pass	Fail	Fail	Pass	Fail	Fail	Fail	Fail	Pass	Pass	Pass	Ixodes ricinus
DK	DK-485	7	Fail	Pass	Pass	Fail	Pass	Fail	Fail	Pass	Pass	Fail	Fail	Fail	Fail	Fail	Fail	Ixodes ricinus
DK	DK-485	8	Fail	Pass	Pass	Fail	Pass	Fail	Fail	Pass	Fail	Fail	Fail	Fail	Fail	Fail	Fail	Ixodes ricinus
DK	DK-485	9	Fail	Pass	Fail	Fail	Fail	Fail	Fail	Pass	Fail	Fail	Fail	Fail	Pass	Pass	Pass	Ixodes ricinus
DK	DK-485	10	Fail	Pass	Fail	Fail	Fail	Fail	Fail	Pass	Fail	Fail	Fail	Fail	Fail	Fail	Fail	Ixodes ricinus
DK	DK-485	11	Fail	Pass	Fail	Fail	Pass	Fail	Pass	Pass	Fail	Fail	Fail	Fail	Fail	Pass	Pass	Ixodes ricinus
DK	DK-485	12	Fail	Pass	Fail	Fail	Pass	Fail	Fail	Pass	Fail	Fail	Fail	Fail	Fail	Fail	Fail	Ixodes ricinus
DK	DK-485	13	Fail	Fail	Fail	Fail	Fail	Fail	Fail	Fail	Fail	Fail	Fail	Fail	Fail	Pass	Pass	Ixodes ricinus
DK	DK-485	14	Fail	Pass	Fail	Fail	Fail	Fail	Fail	Pass	Fail	Fail	Fail	Fail	Fail	Pass	Pass	Ixodes ricinus
DK	DK-485	15	Pass	Pass	Pass	Fail	Fail	Fail	Fail	Pass	Fail	Fail	Fail	Fail	Pass	Fail	Fail	Ixodes ricinus
DK	DK-485	16	Fail	Pass	Pass	Fail	Fail	Fail	Fail	Fail	Fail	Fail	Fail	Fail	Pass	Pass	Pass	Ixodes ricinus
DK	DK-485	17	Fail	Pass	Fail	Fail	Pass	Fail	Pass	Fail	Fail	Fail	Fail	Fail	Pass	Pass	Pass	Ixodes ricinus
DK	DK-485	18	Fail	Pass	Fail	Fail	Pass	Fail	Pass	Fail	Pass	Fail	Fail	Fail	Fail	Fail	Fail	Ixodes ricinus
DK	DK-485	19	Fail	Pass	Fail	Fail	Fail	Fail	Fail	Pass	Fail	Fail	Fail	Fail	Fail	Pass	Pass	Ixodes ricinus
DK	DK-485	20	Fail	Pass	Pass	Fail	Fail	Fail	Fail	Pass	Fail	Fail	Fail	Fail	Fail	Fail	Fail	Ixodes ricinus
DK	DK-485	21	Fail	Pass	Pass	Fail	Fail	Fail	Fail	Pass	Fail	Fail	Fail	Fail	Fail	Fail	Pass	Ixodes ricinus
DK	DK-485	22	Fail	Pass	Fail	Fail	Fail	Fail	Fail	Pass	Fail	Fail	Fail	Fail	Pass	Pass	Pass	Ixodes ricinus
DK	DK-485	23	Fail	Pass	Pass	Fail	Pass	Fail	Pass	Pass	Fail	Fail	Fail	Fail	Fail	Pass	Pass	Ixodes ricinus
DK	DK-485	24	Fail	Pass	Pass	Fail	Pass	Fail	Fail	Pass	Fail	Fail	Fail	Fail	Fail	Pass	Pass	Ixodes ricinus
DK	DK-485	25	Fail	Pass	Pass	Fail	Fail	Fail	Fail	Fail	Fail	Fail	Fail	Fail	Fail	Fail	Fail	Ixodes ricinus
DK	DK-485	26	Fail	Pass	Fail	Fail	Pass	Fail	Fail	Pass	Fail	Fail	Fail	Fail	Fail	Fail	Fail	Ixodes ricinus
DK	DK-485	27	Fail	Pass	Pass	Fail	Pass	Fail	Fail	Fail	Pass	Fail	Fail	Fail	Fail	Pass	Pass	Ixodes ricinus
DK	DK-485	28	Fail	Fail	Fail	Fail	Fail	Fail	Fail	Fail	Fail	Fail	Fail	Fail	Pass	Pass	Pass	Ixodes ricinus
DK	DK-485	29	Fail	Pass	Pass	Fail	Fail	Fail	Fail	Pass	Fail	Fail	Fail	Fail	Fail	Fail	Fail	Ixodes ricinus
DK	DK-485	30	Fail	Pass	Fail	Fail	Pass	Fail	Fail	Pass	Fail	Fail	Fail	Fail	Pass	Fail	Pass	Ixodes ricinus
DK	DK-485	31	Fail	Pass	Pass	Fail	Pass	Fail	Fail	Pass	Pass	Fail	Fail	Fail	Pass	Pass	Pass	Ixodes ricinus
DK	DK-485	32	Fail	Pass	Pass	Fail	Fail	Fail	Fail	Pass	Fail	Fail	Fail	Pass	Pass	Fail	Fail	Ixodes ricinus
DK	DK-485	33	Fail	Pass	Fail	Fail	Pass	Fail	Fail	Pass	Fail	Fail	Fail	Fail	Fail	Fail	Pass	Ixodes ricinus
DK	DK-485	34	Fail	Pass	Pass	Fail	Fail	Fail	Fail	Fail	Fail	Fail	Fail	Pass	Fail	Fail	Fail	Ixodes ricinus
DK	DK-485	35	Fail	Pass	Fail	Fail	Pass	Fail	Fail	Pass	Fail	Fail	Fail	Fail	Fail	Pass	Pass	Ixodes ricinus
DK	DK-485	36	Fail	Pass	Fail	Fail	Pass	Fail	Fail	Pass	Fail	Fail	Fail	Fail	Fail	Fail	Pass	Ixodes ricinus
DK	DK-485	37	Fail	Pass	Fail	Pass	Fail	Fail	Fail	Pass	Fail	Fail	Fail	Fail	Fail	Pass	Pass	Ixodes ricinus
DK	DK-485	38	Fail	Pass	Pass	Fail	Pass	Fail	Fail	Pass	Pass	Fail	Fail	Fail	Fail	Pass	Pass	Ixodes ricinus
DK	DK-485	39	Fail	Pass	Fail	Fail	Pass	Fail	Fail	Pass	Fail	Fail	Fail	Fail	Fail	Fail	Fail	Ixodes ricinus
DK	DK-485	40	Fail	Fail	Fail	Fail	Fail	Fail	Fail	Fail	Fail	Fail	Fail	Pass	Fail	Pass	Pass	Ixodes ricinus
DK	DK-485	41	Fail	Pass	Fail	Fail	Pass	Fail	Fail	Pass	Pass	Fail	Fail	Fail	Fail	Fail	Fail	Ixodes ricinus
DK	DK-485	42	Fail	Pass	Fail	Fail	Pass	Fail	Pass	Fail	Fail	Fail	Fail	Fail	Fail	Pass	Pass	Ixodes ricinus
DK	DK-485	43	Fail	Pass	Pass	Fail	Pass	Fail	Pass	Pass	Fail	Fail	Fail	Fail	Fail	Fail	Fail	Ixodes ricinus
DK	DK-485	44	Fail	Pass	Fail	Pass	Fail	Fail	Fail	Pass	Fail	Fail	Fail	Fail	Fail	Pass	Pass	Ixodes ricinus
DK	DK-485	45	Fail	Pass	Pass	Fail	Pass	Fail	Pass	Fail	Fail	Fail	Fail	Fail	Pass	Fail	Fail	Ixodes ricinus
DK	DK-485	46	Fail	Pass	Pass	Fail	Fail	Fail	Fail	Fail	Fail	Fail	Fail	Fail	Pass	Fail	Fail	Ixodes ricinus
DK	DK-485	47	Fail	Pass	Fail	Fail	Pass	Fail	Fail	Pass	Pass	Fail	Fail	Fail	Fail	Fail	Pass	Ixodes ricinus
DK	DK-485	48	Fail	Pass	Fail	Pass	Fail	Fail	Fail	Pass	Fail	Fail	Fail	Fail	Fail	Pass	Pass	Ixodes ricinus
DK	DK-485	49	Fail	Pass	Fail	Fail	Pass	Fail	Pass	Pass	Pass	Fail	Fail	Fail	Fail	Fail	Fail	Ixodes ricinus
DK	DK-485	50	Fail	Pass	Fail	Fail	Pass	Fail	Fail	Pass	Fail	Fail	Fail	Fail	Fail	Fail	Fail	Ixodes ricinus
DK	DK-485	51	Fail	Pass	Pass	Fail	Pass	Fail	Fail	Pass	Fail	Fail	Fail	Fail	Fail	Fail	Pass	Ixodes ricinus
DK	DK-485	52	Fail	Fail	Fail	Fail	Fail	Fail	Fail	Fail	Fail	Fail	Fail	Fail	Pass	Pass	Pass	Ixodes ricinus
DK	DK-485	53	Fail	Pass	Pass	Fail	Pass	Fail	Pass	Fail	Fail	Fail	Fail	Pass	Pass	Fail	Fail	Ixodes ricinus
DK	DK-485	54	Fail	Pass	Pass	Fail	Fail	Fail	Fail	Pass	Fail	Fail	Fail	Fail	Pass	Pass	Pass	Ixodes ricinus
DK	DK-485	55	Fail	Fail	Fail	Fail	Fail	Fail	Fail	Fail	Fail	Fail	Fail	Fail	Fail	Fail	Pass	Ixodes ricinus
DK	DK-485	56	Fail	Pass	Fail	Pass	Pass	Fail	Fail	Pass	Fail	Fail	Fail	Fail	Fail	Fail	Pass	Ixodes ricinus
DK	DK-485	57	Fail	Pass	Fail	Fail	Fail	Fail	Fail	Pass	Fail	Fail	Fail	Fail	Fail	Fail	Pass	Ixodes ricinus
DK	DK-485	58	Fail	Pass	Fail	Fail	Fail	Fail	Fail	Pass	Fail	Fail	Fail	Fail	Fail	Pass	Pass	Ixodes ricinus
DK	DK-485	59	Fail	Pass	Pass	Fail	Fail	Fail	Fail	Pass	Fail	Fail	Fail	Fail	Pass	Fail	Fail	Ixodes ricinus
DK	DK-485	60	Fail	Fail	Fail	Fail	Fail	Fail	Fail	Fail	Pass	Fail	Fail	Fail	Fail	Fail	Fail	Ixodes ricinus
DK	DK-521	1	Fail	Fail	Fail	Fail	Fail	Fail	Fail	Fail	Fail	Fail	Fail	Fail	Fail	Pass	Pass	Ixodes ricinus
DK	DK-521	2	Fail	Pass	Pass	Fail	Fail	Fail	Fail	Fail	Fail	Fail	Fail	Fail	Pass	Fail	Fail	Ixodes ricinus
DK	DK-521	3	Fail	Fail	Fail	Fail	Fail	Fail	Fail	Fail	Fail	Fail	Fail	Fail	Fail	Pass	Pass	Ixodes ricinus
DK	DK-521	4	Fail	Pass	Pass	Fail	Pass	Fail	Fail	Fail	Fail	Fail	Fail	Fail	Fail	Pass	Pass	Ixodes ricinus
DK	DK-521	5	Pass	Pass	Fail	Fail	Fail	Fail	Fail	Fail	Fail	Fail	Fail	Fail	Fail	Pass	Pass	Ixodes ricinus
DK	DK-521	6	Fail	Pass	Pass	Fail	Fail	Fail	Fail	Fail	Fail	Fail	Fail	Fail	Fail	Pass	Pass	Ixodes ricinus
DK	DK-521	7	Fail	Pass	Pass	Fail	Fail	Fail	Fail	Fail	Fail	Fail	Fail	Fail	Fail	Fail	Fail	Ixodes ricinus
DK	DK-521	8	Pass	Pass	Pass	Fail	Pass	Fail	Pass	Fail	Fail	Fail	Fail	Pass	Pass	Pass	Pass	Ixodes ricinus
DK	DK-521	9	Fail	Pass	Pass	Fail	Fail	Fail	Fail	Fail	Fail	Fail	Fail	Fail	Fail	Pass	Pass	Ixodes ricinus
DK	DK-521	10	Fail	Pass	Pass	Fail	Fail	Fail	Fail	Fail	Fail	Fail	Fail	Fail	Fail	Fail	Fail	Ixodes ricinus
DK	DK-521	11	Fail	Pass	Pass	Fail	Pass	Fail	Fail	Pass	Fail	Fail	Fail	Fail	Fail	Fail	Fail	Ixodes ricinus
DK	DK-521	12	Fail	Pass	Pass	Fail	Fail	Fail	Fail	Fail	Fail	Pass	Fail	Fail	Fail	Pass	Pass	Ixodes ricinus
DK	DK-521	13	Fail	Pass	Pass	Fail	Pass	Fail	Fail	Fail	Fail	Fail	Fail	Fail	Pass	Fail	Fail	Ixodes ricinus
DK	DK-521	14	Fail	Fail	Fail	Fail	Fail	Fail	Fail	Fail	Fail	Fail	Fail	Fail	Fail	Fail	Fail	Ixodes ricinus
DK	DK-521	15	Fail	Fail	Fail	Fail	Fail	Fail	Fail	Fail	Fail	Fail	Fail	Fail	Fail	Fail	Fail	Ixodes ricinus
DK	DK-521	16	Fail	Pass	Fail	Fail	Pass	Fail	Fail	Fail	Fail	Fail	Fail	Fail	Fail	Fail	Fail	Ixodes ricinus
DK	DK-521	17	Pass	Pass	Pass	Fail	Fail	Fail	Fail	Fail	Fail	Fail	Fail	Fail	Pass	Pass	Pass	Ixodes ricinus
DK	DK-521	18	Fail	Fail	Fail	Fail	Fail	Fail	Fail	Fail	Fail	Fail	Fail	Fail	Fail	Fail	Fail	Ixodes ricinus
DK	DK-521	19	Fail	Pass	Pass	Fail	Fail	Fail	Fail	Pass	Fail	Fail	Fail	Fail	Pass	Fail	Fail	Ixodes ricinus
DK	DK-521	20	Fail	Pass	Pass	Fail	Fail	Fail	Fail	Fail	Fail	Fail	Fail	Fail	Pass	Pass	Pass	Ixodes ricinus
DK	DK-521	21	Fail	Pass	Pass	Fail	Fail	Fail	Fail	Fail	Pass	Fail	Fail	Fail	Fail	Fail	Fail	Ixodes ricinus
DK	DK-521	22	Fail	Pass	Pass	Fail	Pass	Fail	Fail	Fail	Fail	Fail	Fail	Fail	Fail	Fail	Fail	Ixodes ricinus
DK	DK-521	23	Fail	Pass	Pass	Fail	Fail	Fail	Fail	Fail	Fail	Fail	Fail	Fail	Fail	Pass	Pass	Ixodes ricinus
DK	DK-521	24	Fail	Pass	Pass	Fail	Fail	Fail	Fail	Fail	Fail	Fail	Fail	Fail	Fail	Fail	Fail	Ixodes ricinus
DK	DK-521	25	Fail	Pass	Pass	Fail	Fail	Fail	Fail	Fail	Fail	Fail	Fail	Fail	Fail	Fail	Fail	Ixodes ricinus
DK	DK-521	26	Fail	Pass	Pass	Fail	Fail	Fail	Fail	Fail	Fail	Fail	Fail	Fail	Pass	Fail	Fail	Ixodes ricinus
DK	DK-521	27	Fail	Pass	Pass	Fail	Fail	Fail	Fail	Fail	Fail	Fail	Fail	Fail	Fail	Fail	Fail	Ixodes ricinus
DK	DK-521	28	Fail	Pass	Pass	Fail	Fail	Fail	Fail	Fail	Fail	Fail	Fail	Fail	Pass	Fail	Fail	Ixodes ricinus
DK	DK-521	29	Fail	Pass	Fail	Fail	Pass	Fail	Fail	Fail	Fail	Pass	Fail	Fail	Fail	Fail	Fail	Ixodes ricinus
DK	DK-521	30	Fail	Pass	Pass	Fail	Fail	Fail	Fail	Fail	Fail	Fail	Fail	Fail	Pass	Pass	Pass	Ixodes ricinus
DK	DK-521	31	Fail	Pass	Pass	Fail	Pass	Fail	Pass	Fail	Fail	Fail	Fail	Fail	Pass	Fail	Fail	Ixodes ricinus
DK	DK-521	32	Fail	Fail	Fail	Fail	Fail	Fail	Fail	Fail	Fail	Fail	Fail	Fail	Pass	Fail	Fail	Ixodes ricinus
DK	DK-521	33	Fail	Fail	Fail	Fail	Fail	Fail	Fail	Fail	Fail	Fail	Fail	Fail	Fail	Fail	Fail	Ixodes ricinus
DK	DK-521	34	Fail	Pass	Pass	Fail	Fail	Fail	Fail	Fail	Fail	Fail	Fail	Fail	Fail	Fail	Fail	Ixodes ricinus
DK	DK-521	35	Fail	Pass	Fail	Fail	Pass	Fail	Fail	Fail	Fail	Pass	Fail	Fail	Pass	Pass	Pass	Ixodes ricinus
DK	DK-521	36	Fail	Pass	Fail	Fail	Pass	Fail	Pass	Fail	Fail	Fail	Fail	Fail	Fail	Fail	Fail	Ixodes ricinus
DK	DK-521	37	Fail	Pass	Pass	Fail	Fail	Fail	Fail	Fail	Fail	Fail	Fail	Fail	Fail	Pass	Pass	Ixodes ricinus
DK	DK-521	38	Fail	Fail	Fail	Fail	Fail	Fail	Fail	Fail	Fail	Fail	Fail	Fail	Fail	Pass	Pass	Ixodes ricinus
DK	DK-521	39	Pass	Pass	Pass	Fail	Fail	Fail	Fail	Fail	Fail	Fail	Fail	Fail	Pass	Fail	Fail	Ixodes ricinus
DK	DK-521	40	Fail	Pass	Pass	Fail	Pass	Fail	Pass	Fail	Fail	Fail	Fail	Fail	Pass	Pass	Pass	Ixodes ricinus
DK	DK-521	41	Fail	Fail	Fail	Fail	Fail	Fail	Fail	Fail	Fail	Fail	Fail	Pass	Pass	Fail	Fail	Ixodes ricinus
DK	DK-521	42	Fail	Pass	Pass	Fail	Fail	Fail	Fail	Fail	Fail	Fail	Fail	Fail	Pass	Pass	Pass	Ixodes ricinus
DK	DK-521	43	Fail	Pass	Pass	Fail	Fail	Fail	Fail	Pass	Fail	Fail	Fail	Fail	Pass	Pass	Pass	Ixodes ricinus
DK	DK-521	44	Fail	Fail	Fail	Fail	Fail	Fail	Fail	Fail	Fail	Fail	Fail	Fail	Fail	Fail	Fail	Ixodes ricinus
DK	DK-521	45	Pass	Pass	Pass	Fail	Fail	Fail	Fail	Fail	Fail	Fail	Fail	Fail	Pass	Fail	Fail	Ixodes ricinus
DK	DK-521	46	Fail	Pass	Pass	Fail	Pass	Fail	Fail	Pass	Fail	Fail	Fail	Fail	Fail	Fail	Fail	Ixodes ricinus
DK	DK-521	47	Fail	Pass	Pass	Fail	Fail	Fail	Fail	Fail	Fail	Fail	Fail	Fail	Fail	Pass	Pass	Ixodes ricinus
DK	DK-521	48	Fail	Pass	Pass	Fail	Pass	Fail	Pass	Fail	Fail	Fail	Fail	Fail	Fail	Pass	Pass	Ixodes ricinus
DK	DK-521	49	Fail	Pass	Pass	Fail	Fail	Fail	Fail	Fail	Fail	Fail	Fail	Fail	Fail	Pass	Pass	Ixodes ricinus
DK	DK-521	50	Fail	Pass	Pass	Fail	Pass	Fail	Pass	Fail	Fail	Fail	Fail	Fail	Pass	Fail	Fail	Ixodes ricinus
DK	DK-521	51	Fail	Pass	Pass	Fail	Fail	Fail	Fail	Fail	Fail	Fail	Fail	Fail	Fail	Pass	Pass	Ixodes ricinus
DK	DK-521	52	Fail	Pass	Pass	Fail	Fail	Fail	Fail	Fail	Fail	Fail	Fail	Fail	Pass	Fail	Fail	Ixodes ricinus
DK	DK-521	53	Fail	Pass	Pass	Fail	Pass	Fail	Fail	Fail	Fail	Fail	Fail	Fail	Pass	Fail	Fail	Ixodes ricinus
DK	DK-521	54	Fail	Pass	Pass	Fail	Fail	Fail	Fail	Fail	Fail	Fail	Fail	Fail	Pass	Pass	Pass	Ixodes ricinus
DK	DK-521	55	Fail	Pass	Fail	Fail	Fail	Fail	Fail	Pass	Fail	Fail	Fail	Fail	Fail	Fail	Fail	Ixodes ricinus
DK	DK-521	56	Fail	Pass	Pass	Fail	Fail	Fail	Fail	Fail	Fail	Fail	Fail	Fail	Pass	Pass	Pass	Ixodes ricinus
DK	DK-521	57	Fail	Pass	Pass	Fail	Fail	Fail	Fail	Fail	Fail	Fail	Fail	Fail	Pass	Fail	Fail	Ixodes ricinus
DK	DK-521	58	Fail	Pass	Pass	Fail	Fail	Fail	Fail	Fail	Fail	Fail	Fail	Fail	Fail	Fail	Fail	Ixodes ricinus
DK	DK-521	59	Fail	Pass	Pass	Fail	Fail	Fail	Fail	Fail	Fail	Fail	Fail	Fail	Fail	Pass	Pass	Ixodes ricinus
DK	DK-554	1	Fail	Pass	Pass	Fail	Fail	Fail	Fail	Fail	Fail	Fail	Fail	Fail	Pass	Pass	Pass	Ixodes ricinus
DK	DK-554	2	Fail	Pass	Pass	Fail	Fail	Fail	Fail	Fail	Fail	Fail	Fail	Fail	Fail	Pass	Pass	Ixodes ricinus
DK	DK-554	3	Fail	Pass	Pass	Fail	Fail	Fail	Fail	Fail	Fail	Fail	Fail	Fail	Fail	Pass	Pass	Ixodes ricinus
DK	DK-554	4	Pass	Pass	Fail	Fail	Pass	Fail	Fail	Fail	Fail	Fail	Fail	Fail	Pass	Pass	Pass	Ixodes ricinus
DK	DK-554	5	Fail	Fail	Fail	Fail	Fail	Fail	Fail	Fail	Fail	Fail	Fail	Fail	Fail	Pass	Pass	Ixodes ricinus
DK	DK-554	6	Fail	Fail	Fail	Fail	Fail	Fail	Fail	Fail	Fail	Fail	Fail	Fail	Fail	Fail	Fail	Ixodes ricinus
DK	DK-554	7	Fail	Fail	Fail	Fail	Fail	Fail	Fail	Fail	Pass	Fail	Fail	Fail	Fail	Fail	Fail	Ixodes ricinus
DK	DK-554	8	Fail	Fail	Fail	Fail	Fail	Fail	Fail	Fail	Fail	Fail	Fail	Pass	Fail	Pass	Pass	Ixodes ricinus
DK	DK-554	9	Fail	Fail	Fail	Fail	Fail	Fail	Fail	Fail	Fail	Fail	Fail	Fail	Fail	Pass	Pass	Ixodes ricinus
DK	DK-554	10	Fail	Fail	Fail	Fail	Fail	Fail	Fail	Fail	Fail	Fail	Fail	Fail	Pass	Pass	Pass	Ixodes ricinus
DK	DK-554	11	Pass	Pass	Pass	Fail	Fail	Fail	Fail	Fail	Fail	Fail	Fail	Fail	Pass	Pass	Pass	Ixodes ricinus
DK	DK-554	12	Pass	Pass	Pass	Fail	Fail	Fail	Fail	Pass	Pass	Fail	Fail	Fail	Fail	Pass	Pass	Ixodes ricinus
DK	DK-554	13	Fail	Pass	Pass	Pass	Fail	Fail	Fail	Fail	Fail	Fail	Fail	Fail	Fail	Pass	Pass	Ixodes ricinus
DK	DK-554	14	Fail	Pass	Fail	Fail	Fail	Fail	Fail	Fail	Fail	Fail	Fail	Fail	Pass	Pass	Pass	Ixodes ricinus
DK	DK-554	15	Fail	Pass	Fail	Fail	Fail	Fail	Fail	Pass	Fail	Fail	Fail	Fail	Pass	Pass	Pass	Ixodes ricinus
DK	DK-554	16	Fail	Fail	Fail	Fail	Fail	Fail	Fail	Fail	Fail	Fail	Fail	Fail	Fail	Pass	Pass	Ixodes ricinus
DK	DK-554	17	Fail	Pass	Pass	Fail	Fail	Fail	Fail	Fail	Fail	Fail	Fail	Fail	Pass	Fail	Fail	Ixodes ricinus
DK	DK-554	18	Fail	Pass	Pass	Fail	Fail	Fail	Fail	Fail	Fail	Fail	Fail	Fail	Fail	Pass	Pass	Ixodes ricinus
DK	DK-554	19	Fail	Fail	Fail	Fail	Fail	Fail	Fail	Fail	Fail	Fail	Fail	Fail	Fail	Fail	Fail	Ixodes ricinus
DK	DK-554	20	Fail	Fail	Fail	Fail	Fail	Fail	Fail	Fail	Pass	Fail	Fail	Fail	Fail	Pass	Pass	Ixodes ricinus
DK	DK-554	21	Fail	Fail	Fail	Fail	Fail	Fail	Fail	Fail	Fail	Fail	Fail	Fail	Fail	Pass	Pass	Ixodes ricinus
DK	DK-554	22	Fail	Pass	Pass	Fail	Fail	Fail	Fail	Fail	Fail	Fail	Fail	Fail	Pass	Pass	Pass	Ixodes ricinus
DK	DK-554	23	Fail	Pass	Pass	Pass	Fail	Fail	Fail	Fail	Pass	Fail	Fail	Fail	Fail	Fail	Pass	Ixodes ricinus
DK	DK-554	24	Fail	Pass	Pass	Fail	Fail	Fail	Fail	Fail	Fail	Fail	Fail	Fail	Fail	Fail	Fail	Ixodes ricinus
DK	DK-554	25	Fail	Pass	Pass	Fail	Fail	Fail	Fail	Fail	Fail	Fail	Fail	Fail	Pass	Fail	Fail	Ixodes ricinus
DK	DK-554	26	Fail	Pass	Pass	Fail	Fail	Fail	Fail	Fail	Fail	Fail	Fail	Fail	Fail	Fail	Fail	Ixodes ricinus
DK	DK-554	27	Fail	Fail	Fail	Fail	Fail	Fail	Fail	Fail	Fail	Fail	Fail	Fail	Pass	Pass	Pass	Ixodes ricinus
DK	DK-554	28	Fail	Fail	Fail	Fail	Fail	Fail	Fail	Fail	Fail	Pass	Fail	Fail	Pass	Fail	Fail	Ixodes ricinus
DK	DK-554	29	Fail	Pass	Pass	Fail	Fail	Fail	Fail	Fail	Fail	Fail	Fail	Fail	Pass	Pass	Pass	Ixodes ricinus
DK	DK-554	30	Fail	Pass	Pass	Fail	Fail	Fail	Fail	Fail	Fail	Fail	Fail	Fail	Pass	Pass	Pass	Ixodes ricinus
DK	DK-554	31	Fail	Fail	Fail	Fail	Fail	Fail	Fail	Fail	Fail	Fail	Fail	Fail	Fail	Fail	Fail	Ixodes ricinus
DK	DK-554	32	Fail	Pass	Pass	Fail	Fail	Fail	Fail	Fail	Fail	Fail	Fail	Fail	Fail	Pass	Pass	Ixodes ricinus
DK	DK-554	33	Fail	Pass	Pass	Fail	Fail	Fail	Fail	Pass	Fail	Fail	Fail	Fail	Pass	Pass	Pass	Ixodes ricinus
DK	DK-554	34	Fail	Fail	Fail	Fail	Fail	Fail	Fail	Fail	Fail	Fail	Fail	Fail	Pass	Pass	Pass	Ixodes ricinus
DK	DK-554	35	Fail	Fail	Fail	Fail	Fail	Fail	Fail	Fail	Fail	Fail	Fail	Fail	Fail	Fail	Fail	Ixodes ricinus
DK	DK-554	36	Fail	Pass	Pass	Fail	Fail	Fail	Fail	Fail	Fail	Fail	Fail	Fail	Fail	Pass	Pass	Ixodes ricinus
DK	DK-554	37	Fail	Pass	Pass	Fail	Fail	Fail	Fail	Fail	Fail	Fail	Fail	Fail	Fail	Pass	Pass	Ixodes ricinus
DK	DK-554	38	Fail	Pass	Pass	Fail	Fail	Fail	Fail	Fail	Pass	Fail	Fail	Fail	Pass	Fail	Fail	Ixodes ricinus
DK	DK-554	39	Fail	Fail	Fail	Fail	Fail	Fail	Fail	Fail	Fail	Fail	Fail	Fail	Fail	Fail	Fail	Ixodes ricinus
DK	DK-554	40	Fail	Pass	Pass	Fail	Pass	Fail	Pass	Fail	Fail	Fail	Fail	Fail	Fail	Pass	Pass	Ixodes ricinus
DK	DK-554	41	Fail	Fail	Fail	Fail	Fail	Fail	Fail	Fail	Pass	Fail	Fail	Fail	Fail	Pass	Pass	Ixodes ricinus
DK	DK-554	42	Fail	Pass	Pass	Fail	Fail	Fail	Fail	Fail	Pass	Fail	Fail	Fail	Pass	Pass	Pass	Ixodes ricinus
DK	DK-554	43	Fail	Pass	Pass	Fail	Fail	Fail	Fail	Fail	Fail	Fail	Fail	Fail	Pass	Pass	Pass	Ixodes ricinus
DK	DK-554	44	Fail	Pass	Fail	Fail	Pass	Fail	Pass	Fail	Fail	Fail	Fail	Pass	Fail	Fail	Fail	Ixodes ricinus
DK	DK-554	45	Fail	Pass	Pass	Fail	Fail	Fail	Fail	Fail	Fail	Fail	Fail	Fail	Pass	Pass	Pass	Ixodes ricinus
DK	DK-554	46	Fail	Fail	Fail	Fail	Fail	Fail	Fail	Fail	Fail	Fail	Fail	Fail	Fail	Pass	Pass	Ixodes ricinus
DK	DK-554	47	Fail	Pass	Pass	Fail	Pass	Fail	Fail	Pass	Fail	Fail	Fail	Fail	Pass	Pass	Pass	Ixodes ricinus
DK	DK-554	48	Fail	Fail	Fail	Fail	Fail	Fail	Fail	Fail	Fail	Fail	Fail	Fail	Fail	Fail	Fail	Ixodes ricinus
DK	DK-554	49	Fail	Pass	Pass	Fail	Fail	Fail	Fail	Fail	Fail	Fail	Fail	Fail	Fail	Fail	Fail	Ixodes ricinus
DK	DK-554	50	Fail	Fail	Fail	Fail	Fail	Fail	Fail	Fail	Fail	Fail	Fail	Fail	Fail	Fail	Fail	Ixodes ricinus
DK	DK-554	51	Fail	Pass	Pass	Fail	Fail	Fail	Fail	Fail	Fail	Fail	Fail	Fail	Fail	Fail	Fail	Ixodes ricinus
DK	DK-554	52	Fail	Pass	Pass	Fail	Pass	Pass	Fail	Fail	Fail	Fail	Fail	Fail	Pass	Pass	Pass	Ixodes ricinus
DK	DK-554	53	Fail	Pass	Pass	Fail	Pass	Fail	Fail	Fail	Fail	Fail	Fail	Fail	Pass	Pass	Pass	Ixodes ricinus
DK	DK-554	54	Fail	Fail	Fail	Fail	Fail	Fail	Fail	Fail	Fail	Fail	Fail	Fail	Pass	Pass	Pass	Ixodes ricinus
DK	DK-554	55	Fail	Fail	Fail	Fail	Fail	Fail	Fail	Fail	Fail	Fail	Fail	Fail	Fail	Fail	Fail	Ixodes ricinus
DK	DK-554	56	Fail	Pass	Pass	Fail	Fail	Fail	Fail	Fail	Fail	Fail	Fail	Fail	Fail	Pass	Pass	Ixodes ricinus
DK	DK-554	57	Fail	Fail	Fail	Fail	Fail	Fail	Fail	Fail	Fail	Fail	Fail	Fail	Fail	Fail	Fail	Ixodes ricinus
DK	DK-554	58	Fail	Pass	Fail	Fail	Pass	Fail	Fail	Fail	Pass	Fail	Fail	Fail	Pass	Pass	Pass	Ixodes ricinus
DK	DK-554	59	Fail	Fail	Fail	Fail	Fail	Fail	Fail	Fail	Fail	Fail	Fail	Fail	Fail	Pass	Pass	Ixodes ricinus
DK	DK-554	60	Fail	Fail	Fail	Fail	Fail	Fail	Fail	Fail	Fail	Fail	Fail	Fail	Fail	Pass	Pass	Ixodes ricinus
DK	DK-601	1	Fail	Pass	Pass	Pass	Pass	Fail	Pass	Fail	Fail	Fail	Fail	Fail	Fail	Fail	Fail	Ixodes ricinus
DK	DK-601	2	Fail	Pass	Fail	Fail	Pass	Fail	Pass	Fail	Fail	Fail	Fail	Fail	Fail	Fail	Fail	Ixodes ricinus
DK	DK-601	3	Fail	Pass	Fail	Fail	Pass	Fail	Pass	Fail	Fail	Fail	Fail	Pass	Fail	Fail	Fail	Ixodes ricinus
DK	DK-601	4	Fail	Fail	Fail	Fail	Fail	Fail	Fail	Fail	Fail	Fail	Fail	Fail	Fail	Fail	Fail	Ixodes ricinus
DK	DK-601	5	Fail	Pass	Pass	Fail	Pass	Fail	Fail	Pass	Fail	Fail	Fail	Pass	Pass	Fail	Fail	Ixodes ricinus
DK	DK-601	6	Fail	Pass	Pass	Fail	Fail	Fail	Fail	Fail	Fail	Fail	Fail	Fail	Pass	Fail	Fail	Ixodes ricinus
DK	DK-601	7	Fail	Fail	Fail	Fail	Fail	Fail	Fail	Fail	Fail	Fail	Fail	Fail	Fail	Fail	Fail	Ixodes ricinus
DK	DK-601	8	Fail	Fail	Fail	Fail	Fail	Fail	Fail	Fail	Fail	Fail	Fail	Fail	Fail	Fail	Fail	Ixodes ricinus
DK	DK-601	9	Fail	Fail	Fail	Fail	Fail	Fail	Fail	Fail	Fail	Fail	Fail	Fail	Fail	Fail	Fail	Ixodes ricinus
DK	DK-601	10	Fail	Fail	Fail	Fail	Fail	Fail	Fail	Fail	Fail	Fail	Fail	Fail	Fail	Fail	Fail	Ixodes ricinus
DK	DK-601	11	Fail	Pass	Pass	Fail	Fail	Fail	Fail	Fail	Fail	Pass	Fail	Fail	Fail	Pass	Pass	Ixodes ricinus
DK	DK-601	12	Fail	Fail	Fail	Fail	Fail	Fail	Fail	Fail	Fail	Fail	Fail	Fail	Fail	Fail	Fail	Ixodes ricinus
DK	DK-601	13	Fail	Pass	Fail	Fail	Pass	Fail	Pass	Fail	Fail	Fail	Fail	Fail	Fail	Fail	Fail	Ixodes ricinus
DK	DK-601	14	Fail	Pass	Fail	Fail	Fail	Fail	Fail	Pass	Fail	Fail	Fail	Fail	Fail	Fail	Fail	Ixodes ricinus
DK	DK-601	15	Fail	Fail	Fail	Fail	Fail	Fail	Fail	Fail	Fail	Fail	Fail	Fail	Fail	Pass	Pass	Ixodes ricinus
DK	DK-601	16	Fail	Pass	Fail	Fail	Pass	Fail	Pass	Fail	Fail	Fail	Fail	Fail	Fail	Pass	Pass	Ixodes ricinus
DK	DK-601	17	Fail	Fail	Fail	Fail	Fail	Fail	Fail	Fail	Fail	Fail	Fail	Fail	Fail	Pass	Pass	Ixodes ricinus
DK	DK-601	18	Fail	Pass	Fail	Fail	Fail	Fail	Fail	Pass	Fail	Fail	Fail	Fail	Fail	Pass	Pass	Ixodes ricinus
DK	DK-601	19	Fail	Fail	Fail	Fail	Fail	Fail	Fail	Fail	Fail	Fail	Fail	Fail	Fail	Pass	Pass	Ixodes ricinus
DK	DK-601	20	Fail	Fail	Fail	Fail	Fail	Fail	Fail	Fail	Fail	Fail	Fail	Fail	Fail	Fail	Fail	Ixodes ricinus
DK	DK-601	21	Fail	Pass	Pass	Fail	Fail	Fail	Fail	Fail	Fail	Fail	Fail	Fail	Pass	Fail	Fail	Ixodes ricinus
DK	DK-601	22	Fail	Pass	Fail	Fail	Fail	Fail	Fail	Pass	Fail	Fail	Fail	Fail	Fail	Fail	Fail	Ixodes ricinus
DK	DK-601	23	Fail	Pass	Pass	Fail	Fail	Fail	Fail	Fail	Fail	Fail	Fail	Fail	Fail	Fail	Fail	Ixodes ricinus
DK	DK-601	24	Fail	Pass	Fail	Fail	Pass	Fail	Pass	Pass	Fail	Fail	Fail	Fail	Fail	Fail	Fail	Ixodes ricinus
DK	DK-601	25	Fail	Pass	Fail	Fail	Pass	Fail	Fail	Fail	Fail	Fail	Fail	Fail	Fail	Fail	Fail	Ixodes ricinus
DK	DK-601	26	Fail	Pass	Fail	Fail	Fail	Fail	Fail	Fail	Pass	Fail	Fail	Pass	Fail	Fail	Fail	Ixodes ricinus
DK	DK-601	27	Fail	Fail	Fail	Fail	Fail	Fail	Fail	Fail	Fail	Fail	Fail	Fail	Fail	Fail	Fail	Ixodes ricinus
DK	DK-601	28	Fail	Pass	Fail	Fail	Pass	Fail	Pass	Fail	Fail	Fail	Fail	Pass	Fail	Fail	Fail	Ixodes ricinus
DK	DK-601	29	Fail	Pass	Pass	Fail	Fail	Fail	Fail	Fail	Fail	Fail	Fail	Fail	Fail	Fail	Fail	Ixodes ricinus
DK	DK-601	30	Fail	Pass	Fail	Fail	Pass	Fail	Pass	Fail	Fail	Fail	Fail	Fail	Fail	Fail	Fail	Ixodes ricinus
DK	DK-601	31	Fail	Pass	Fail	Fail	Fail	Fail	Fail	Fail	Fail	Fail	Fail	Fail	Fail	Pass	Pass	Ixodes ricinus
DK	DK-601	32	Fail	Fail	Fail	Fail	Fail	Fail	Fail	Fail	Fail	Fail	Fail	Fail	Fail	Fail	Fail	Ixodes ricinus
DK	DK-601	33	Fail	Pass	Fail	Fail	Pass	Fail	Pass	Fail	Fail	Fail	Fail	Fail	Fail	Pass	Pass	Ixodes ricinus
DK	DK-601	34	Fail	Pass	Pass	Fail	Pass	Fail	Fail	Fail	Fail	Fail	Fail	Fail	Fail	Fail	Fail	Ixodes ricinus
DK	DK-601	35	Fail	Pass	Fail	Fail	Pass	Fail	Fail	Fail	Fail	Fail	Fail	Fail	Fail	Fail	Fail	Ixodes ricinus
DK	DK-601	36	Fail	Pass	Pass	Fail	Pass	Fail	Fail	Pass	Fail	Fail	Fail	Fail	Fail	Pass	Pass	Ixodes ricinus
DK	DK-601	37	Fail	Pass	Fail	Pass	Pass	Fail	Pass	Fail	Fail	Fail	Fail	Fail	Fail	Fail	Fail	Ixodes ricinus
DK	DK-601	38	Fail	Pass	Fail	Pass	Fail	Fail	Fail	Pass	Fail	Fail	Fail	Fail	Fail	Fail	Fail	Ixodes ricinus
DK	DK-601	39	Fail	Fail	Fail	Fail	Fail	Fail	Fail	Fail	Fail	Fail	Fail	Fail	Fail	Pass	Pass	Ixodes ricinus
DK	DK-601	40	Fail	Pass	Fail	Fail	Pass	Fail	Fail	Pass	Fail	Fail	Fail	Fail	Fail	Pass	Fail	Ixodes ricinus
DK	DK-601	41	Fail	Fail	Fail	Fail	Fail	Fail	Fail	Fail	Pass	Fail	Fail	Fail	Fail	Fail	Fail	Ixodes ricinus
DK	DK-601	42	Fail	Fail	Fail	Fail	Fail	Fail	Fail	Fail	Fail	Fail	Fail	Fail	Fail	Fail	Fail	Ixodes ricinus
DK	DK-601	43	Fail	Fail	Fail	Fail	Fail	Fail	Fail	Fail	Fail	Fail	Fail	Fail	Fail	Pass	Pass	Ixodes ricinus
DK	DK-601	44	Fail	Pass	Pass	Pass	Fail	Fail	Fail	Fail	Fail	Fail	Fail	Fail	Fail	Fail	Fail	Ixodes ricinus
DK	DK-601	45	Fail	Pass	Fail	Pass	Pass	Fail	Fail	Pass	Fail	Fail	Fail	Fail	Fail	Fail	Fail	Ixodes ricinus
DK	DK-601	46	Fail	Fail	Fail	Fail	Fail	Fail	Fail	Fail	Fail	Fail	Fail	Fail	Fail	Fail	Fail	Ixodes ricinus
DK	DK-601	47	Fail	Fail	Fail	Fail	Fail	Fail	Fail	Fail	Fail	Fail	Fail	Fail	Fail	Pass	Pass	Ixodes ricinus
DK	DK-601	48	Fail	Fail	Fail	Fail	Fail	Fail	Fail	Fail	Fail	Fail	Fail	Fail	Fail	Fail	Fail	Ixodes ricinus
DK	DK-601	49	Fail	Pass	Fail	Pass	Fail	Fail	Fail	Pass	Fail	Fail	Fail	Fail	Fail	Fail	Fail	Ixodes ricinus
DK	DK-601	50	Fail	Pass	Pass	Fail	Fail	Fail	Fail	Fail	Fail	Fail	Fail	Fail	Fail	Pass	Pass	Ixodes ricinus
DK	DK-601	51	Fail	Pass	Fail	Fail	Pass	Fail	Pass	Fail	Fail	Fail	Fail	Fail	Fail	Pass	Pass	Ixodes ricinus
DK	DK-601	52	Fail	Fail	Fail	Fail	Fail	Fail	Fail	Fail	Fail	Fail	Fail	Fail	Fail	Fail	Fail	Ixodes ricinus
DK	DK-601	53	Fail	Fail	Fail	Fail	Fail	Fail	Fail	Fail	Fail	Fail	Fail	Fail	Fail	Fail	Fail	Ixodes ricinus
DK	DK-601	54	Fail	Pass	Fail	Fail	Pass	Fail	Fail	Pass	Fail	Fail	Fail	Fail	Fail	Pass	Pass	Ixodes ricinus
DK	DK-601	55	Fail	Pass	Fail	Fail	Pass	Fail	Fail	Fail	Fail	Fail	Fail	Pass	Fail	Fail	Fail	Ixodes ricinus
DK	DK-601	56	Fail	Pass	Pass	Fail	Fail	Fail	Fail	Fail	Fail	Fail	Fail	Fail	Fail	Fail	Fail	Ixodes ricinus
DK	DK-601	57	Fail	Fail	Fail	Fail	Fail	Fail	Fail	Fail	Fail	Fail	Fail	Fail	Fail	Fail	Fail	Ixodes ricinus
DK	DK-601	58	Fail	Fail	Fail	Fail	Fail	Fail	Fail	Fail	Fail	Fail	Fail	Fail	Fail	Fail	Fail	Ixodes ricinus
DK	DK-601	59	Fail	Fail	Fail	Fail	Fail	Fail	Fail	Fail	Pass	Fail	Fail	Fail	Pass	Pass	Pass	Ixodes ricinus
DK	DK-601	60	Fail	Pass	Fail	Fail	Pass	Fail	Fail	Pass	Fail	Fail	Fail	Fail	Fail	Pass	Pass	Ixodes ricinus
DK	DK-602	1	Fail	Pass	Pass	Fail	Fail	Fail	Fail	Fail	Fail	Fail	Fail	Fail	Pass	Pass	Pass	Ixodes ricinus
DK	DK-602	2	Fail	Fail	Fail	Fail	Fail	Fail	Fail	Fail	Fail	Fail	Fail	Fail	Fail	Pass	Pass	Ixodes ricinus
DK	DK-602	3	Fail	Pass	Pass	Fail	Fail	Fail	Fail	Fail	Fail	Fail	Fail	Pass	Fail	Pass	Pass	Ixodes ricinus
DK	DK-602	4	Fail	Pass	Pass	Pass	Fail	Fail	Fail	Fail	Fail	Fail	Fail	Fail	Fail	Fail	Pass	Ixodes ricinus
DK	DK-602	5	Fail	Pass	Pass	Fail	Fail	Fail	Fail	Fail	Fail	Fail	Fail	Fail	Fail	Pass	Pass	Ixodes ricinus
DK	DK-602	6	Fail	Fail	Fail	Fail	Fail	Fail	Fail	Fail	Fail	Fail	Fail	Fail	Fail	Fail	Fail	Ixodes ricinus
DK	DK-602	7	Fail	Fail	Fail	Fail	Fail	Fail	Fail	Fail	Fail	Fail	Fail	Fail	Fail	Pass	Pass	Ixodes ricinus
DK	DK-602	8	Fail	Fail	Fail	Fail	Fail	Fail	Fail	Fail	Fail	Fail	Fail	Fail	Fail	Pass	Pass	Ixodes ricinus
DK	DK-602	9	Fail	Pass	Pass	Fail	Fail	Fail	Fail	Fail	Fail	Fail	Fail	Fail	Pass	Pass	Pass	Ixodes ricinus
DK	DK-602	10	Fail	Fail	Fail	Fail	Fail	Fail	Fail	Fail	Fail	Fail	Fail	Fail	Fail	Pass	Pass	Ixodes ricinus
DK	DK-602	11	Fail	Fail	Fail	Fail	Fail	Fail	Fail	Fail	Pass	Fail	Fail	Fail	Fail	Fail	Fail	Ixodes ricinus
DK	DK-602	12	Fail	Fail	Fail	Fail	Fail	Fail	Fail	Fail	Fail	Fail	Fail	Fail	Fail	Pass	Pass	Ixodes ricinus
DK	DK-602	13	Fail	Pass	Pass	Pass	Fail	Fail	Fail	Fail	Fail	Fail	Fail	Fail	Fail	Pass	Pass	Ixodes ricinus
DK	DK-602	14	Fail	Pass	Pass	Fail	Fail	Fail	Fail	Fail	Fail	Fail	Fail	Fail	Fail	Fail	Fail	Ixodes ricinus
DK	DK-602	15	Fail	Pass	Pass	Fail	Fail	Fail	Fail	Fail	Fail	Fail	Fail	Pass	Fail	Pass	Pass	Ixodes ricinus
DK	DK-602	16	Fail	Fail	Fail	Fail	Fail	Fail	Fail	Fail	Fail	Fail	Fail	Fail	Pass	Pass	Pass	Ixodes ricinus
DK	DK-602	17	Fail	Pass	Pass	Fail	Fail	Fail	Fail	Fail	Fail	Fail	Fail	Fail	Pass	Pass	Pass	Ixodes ricinus
DK	DK-602	18	Fail	Fail	Fail	Fail	Fail	Fail	Fail	Fail	Fail	Pass	Fail	Fail	Fail	Pass	Pass	Ixodes ricinus
DK	DK-602	19	Fail	Fail	Fail	Fail	Fail	Fail	Fail	Fail	Fail	Fail	Fail	Fail	Fail	Pass	Pass	Ixodes ricinus
DK	DK-602	20	Fail	Pass	Pass	Fail	Fail	Fail	Fail	Fail	Fail	Fail	Fail	Fail	Pass	Pass	Pass	Ixodes ricinus
DK	DK-602	21	Pass	Fail	Fail	Fail	Fail	Fail	Fail	Fail	Fail	Fail	Fail	Fail	Fail	Pass	Pass	Ixodes ricinus
DK	DK-602	22	Fail	Fail	Fail	Fail	Fail	Fail	Fail	Fail	Fail	Fail	Fail	Fail	Fail	Pass	Pass	Ixodes ricinus
DK	DK-602	23	Pass	Pass	Pass	Fail	Fail	Fail	Fail	Fail	Fail	Fail	Fail	Fail	Fail	Pass	Pass	Ixodes ricinus
DK	DK-602	24	Fail	Pass	Fail	Fail	Fail	Fail	Fail	Fail	Fail	Fail	Fail	Fail	Fail	Pass	Pass	Ixodes ricinus
DK	DK-602	25	Fail	Fail	Fail	Fail	Fail	Fail	Fail	Fail	Fail	Fail	Fail	Fail	Fail	Pass	Pass	Ixodes ricinus
DK	DK-602	26	Fail	Pass	Pass	Fail	Fail	Fail	Fail	Fail	Fail	Fail	Fail	Fail	Pass	Pass	Pass	Ixodes ricinus
DK	DK-602	27	Fail	Fail	Fail	Fail	Fail	Fail	Fail	Fail	Fail	Fail	Fail	Fail	Fail	Fail	Fail	Ixodes ricinus
DK	DK-602	28	Fail	Pass	Fail	Pass	Fail	Fail	Fail	Pass	Fail	Fail	Fail	Fail	Fail	Fail	Pass	Ixodes ricinus
DK	DK-602	29	Fail	Pass	Pass	Fail	Pass	Fail	Pass	Fail	Fail	Fail	Fail	Fail	Fail	Fail	Fail	Ixodes ricinus
DK	DK-602	30	Fail	Pass	Pass	Fail	Fail	Fail	Fail	Pass	Fail	Fail	Fail	Fail	Fail	Fail	Fail	Ixodes ricinus
DK	DK-602	31	Fail	Pass	Pass	Fail	Fail	Fail	Fail	Fail	Fail	Fail	Fail	Fail	Fail	Pass	Pass	Ixodes ricinus
DK	DK-602	32	Fail	Fail	Fail	Fail	Fail	Fail	Fail	Fail	Fail	Fail	Fail	Fail	Pass	Fail	Fail	Ixodes ricinus
DK	DK-602	33	Fail	Fail	Fail	Fail	Fail	Fail	Fail	Fail	Fail	Fail	Fail	Fail	Pass	Fail	Fail	Ixodes ricinus
DK	DK-602	34	Fail	Pass	Pass	Fail	Fail	Fail	Fail	Fail	Fail	Fail	Fail	Fail	Fail	Pass	Pass	Ixodes ricinus
DK	DK-602	35	Fail	Fail	Fail	Fail	Fail	Fail	Fail	Fail	Fail	Fail	Fail	Fail	Fail	Fail	Fail	Ixodes ricinus
DK	DK-602	36	Fail	Pass	Pass	Fail	Fail	Fail	Fail	Fail	Fail	Fail	Fail	Fail	Fail	Pass	Pass	Ixodes ricinus
DK	DK-602	37	Fail	Pass	Fail	Fail	Fail	Fail	Fail	Fail	Pass	Fail	Fail	Fail	Pass	Pass	Pass	Ixodes ricinus
DK	DK-602	38	Fail	Fail	Fail	Fail	Fail	Fail	Fail	Fail	Fail	Fail	Fail	Fail	Pass	Fail	Fail	Ixodes ricinus
DK	DK-602	39	Fail	Pass	Pass	Fail	Fail	Fail	Fail	Fail	Fail	Fail	Fail	Fail	Fail	Pass	Pass	Ixodes ricinus
DK	DK-602	40	Fail	Fail	Fail	Fail	Fail	Fail	Fail	Fail	Pass	Fail	Fail	Fail	Fail	Fail	Fail	Ixodes ricinus
DK	DK-602	41	Fail	Pass	Pass	Pass	Fail	Fail	Fail	Fail	Fail	Fail	Fail	Fail	Pass	Pass	Pass	Ixodes ricinus
DK	DK-602	42	Fail	Pass	Pass	Fail	Fail	Fail	Fail	Fail	Fail	Fail	Fail	Fail	Fail	Fail	Pass	Ixodes ricinus
DK	DK-602	43	Fail	Fail	Fail	Fail	Fail	Fail	Fail	Fail	Pass	Fail	Fail	Fail	Fail	Fail	Fail	Ixodes ricinus
DK	DK-602	44	Fail	Fail	Fail	Fail	Fail	Fail	Fail	Fail	Pass	Fail	Fail	Fail	Fail	Pass	Pass	Ixodes ricinus
DK	DK-602	45	Fail	Pass	Pass	Fail	Fail	Fail	Fail	Fail	Fail	Fail	Fail	Fail	Fail	Pass	Pass	Ixodes ricinus
DK	DK-602	46	Fail	Pass	Pass	Fail	Fail	Fail	Fail	Fail	Fail	Fail	Fail	Fail	Fail	Pass	Fail	Ixodes ricinus
DK	DK-602	47	Fail	Pass	Fail	Fail	Pass	Fail	Pass	Fail	Fail	Fail	Fail	Fail	Fail	Fail	Fail	Ixodes ricinus
DK	DK-602	48	Fail	Fail	Fail	Fail	Fail	Fail	Fail	Fail	Fail	Fail	Fail	Fail	Fail	Pass	Pass	Ixodes ricinus
DK	DK-602	49	Fail	Pass	Pass	Fail	Fail	Fail	Fail	Fail	Fail	Fail	Fail	Fail	Fail	Pass	Pass	Ixodes ricinus
DK	DK-604	1	Fail	Pass	Pass	Fail	Fail	Fail	Fail	Fail	Fail	Fail	Fail	Pass	Fail	Pass	Pass	Ixodes ricinus
DK	DK-604	2	Fail	Pass	Fail	Fail	Pass	Fail	Fail	Pass	Pass	Fail	Fail	Fail	Fail	Fail	Fail	Ixodes ricinus
DK	DK-604	3	Fail	Pass	Pass	Fail	Pass	Fail	Pass	Pass	Fail	Fail	Fail	Fail	Fail	Pass	Pass	Ixodes ricinus
DK	DK-604	4	Fail	Pass	Pass	Fail	Pass	Fail	Fail	Fail	Pass	Fail	Fail	Fail	Fail	Fail	Fail	Ixodes ricinus
DK	DK-604	5	Fail	Pass	Pass	Fail	Pass	Fail	Fail	Fail	Pass	Fail	Fail	Fail	Fail	Fail	Fail	Ixodes ricinus
DK	DK-604	6	Fail	Pass	Pass	Fail	Fail	Fail	Fail	Fail	Fail	Fail	Fail	Fail	Fail	Pass	Pass	Ixodes ricinus
DK	DK-604	7	Fail	Pass	Fail	Fail	Fail	Fail	Fail	Pass	Fail	Fail	Fail	Fail	Pass	Fail	Fail	Ixodes ricinus
DK	DK-604	8	Pass	Pass	Fail	Fail	Fail	Fail	Fail	Fail	Fail	Fail	Fail	Fail	Fail	Pass	Pass	Ixodes ricinus
DK	DK-604	9	Fail	Pass	Pass	Fail	Pass	Fail	Pass	Pass	Fail	Fail	Fail	Fail	Pass	Fail	Fail	Ixodes ricinus
DK	DK-604	10	Fail	Pass	Pass	Fail	Fail	Fail	Fail	Fail	Fail	Fail	Fail	Fail	Fail	Pass	Pass	Ixodes ricinus
DK	DK-604	11	Pass	Pass	Pass	Fail	Pass	Fail	Pass	Pass	Fail	Fail	Fail	Fail	Fail	Pass	Pass	Ixodes ricinus
DK	DK-604	12	Fail	Pass	Pass	Fail	Fail	Fail	Fail	Pass	Fail	Fail	Fail	Fail	Pass	Fail	Fail	Ixodes ricinus
DK	DK-604	13	Fail	Pass	Fail	Fail	Fail	Fail	Fail	Pass	Fail	Fail	Fail	Fail	Fail	Fail	Fail	Ixodes ricinus
DK	DK-604	14	Fail	Fail	Fail	Fail	Fail	Fail	Fail	Fail	Fail	Fail	Fail	Fail	Fail	Pass	Pass	Ixodes ricinus
DK	DK-604	15	Fail	Pass	Pass	Fail	Pass	Fail	Fail	Fail	Pass	Fail	Fail	Fail	Fail	Fail	Fail	Ixodes ricinus
DK	DK-604	16	Fail	Pass	Pass	Fail	Fail	Fail	Fail	Fail	Fail	Fail	Fail	Fail	Fail	Pass	Pass	Ixodes ricinus
DK	DK-604	17	Fail	Fail	Fail	Fail	Fail	Fail	Fail	Fail	Fail	Fail	Fail	Fail	Fail	Fail	Fail	Ixodes ricinus
DK	DK-604	18	Fail	Pass	Pass	Fail	Fail	Fail	Fail	Fail	Pass	Pass	Fail	Fail	Fail	Pass	Fail	Ixodes ricinus
DK	DK-604	19	Fail	Fail	Fail	Fail	Fail	Fail	Fail	Fail	Fail	Fail	Fail	Pass	Fail	Pass	Fail	Ixodes ricinus
DK	DK-604	20	Fail	Fail	Fail	Fail	Fail	Fail	Fail	Fail	Fail	Fail	Fail	Fail	Pass	Pass	Pass	Ixodes ricinus
DK	DK-604	21	Fail	Pass	Pass	Fail	Fail	Fail	Fail	Fail	Fail	Fail	Fail	Fail	Fail	Fail	Fail	Ixodes ricinus
DK	DK-604	22	Fail	Pass	Pass	Fail	Fail	Fail	Fail	Fail	Pass	Fail	Fail	Fail	Fail	Fail	Fail	Ixodes ricinus
DK	DK-604	23	Pass	Pass	Fail	Fail	Pass	Fail	Pass	Fail	Fail	Fail	Fail	Fail	Fail	Pass	Pass	Ixodes ricinus
DK	DK-604	24	Fail	Pass	Fail	Fail	Pass	Fail	Fail	Pass	Pass	Fail	Fail	Fail	Fail	Fail	Fail	Ixodes ricinus
DK	DK-604	25	Fail	Pass	Fail	Fail	Pass	Fail	Pass	Fail	Fail	Fail	Fail	Fail	Pass	Pass	Pass	Ixodes ricinus
DK	DK-604	26	Fail	Pass	Pass	Fail	Pass	Fail	Pass	Pass	Pass	Fail	Fail	Fail	Fail	Fail	Fail	Ixodes ricinus
DK	DK-604	27	Fail	Pass	Fail	Fail	Pass	Fail	Pass	Fail	Fail	Fail	Fail	Fail	Fail	Pass	Pass	Ixodes ricinus
DK	DK-604	28	Fail	Pass	Pass	Fail	Fail	Fail	Fail	Fail	Fail	Fail	Fail	Fail	Fail	Pass	Pass	Ixodes ricinus
DK	DK-604	29	Fail	Pass	Pass	Fail	Fail	Fail	Fail	Fail	Fail	Fail	Fail	Fail	Pass	Fail	Fail	Ixodes ricinus
DK	DK-604	30	Fail	Pass	Fail	Fail	Pass	Fail	Fail	Pass	Fail	Fail	Fail	Fail	Fail	Pass	Fail	Ixodes ricinus
DK	DK-604	31	Fail	Pass	Pass	Fail	Fail	Fail	Fail	Fail	Fail	Fail	Fail	Fail	Fail	Pass	Pass	Ixodes ricinus
DK	DK-604	32	Fail	Pass	Pass	Fail	Fail	Fail	Fail	Fail	Fail	Fail	Fail	Fail	Pass	Pass	Pass	Ixodes ricinus
DK	DK-604	33	Fail	Pass	Pass	Fail	Pass	Fail	Fail	Fail	Fail	Fail	Fail	Fail	Pass	Pass	Pass	Ixodes ricinus
DK	DK-604	34	Fail	Pass	Pass	Fail	Fail	Fail	Fail	Fail	Fail	Fail	Fail	Fail	Pass	Fail	Fail	Ixodes ricinus
DK	DK-604	35	Pass	Pass	Pass	Fail	Fail	Fail	Fail	Fail	Fail	Fail	Fail	Fail	Pass	Fail	Fail	Ixodes ricinus
DK	DK-604	36	Fail	Pass	Pass	Fail	Fail	Fail	Fail	Fail	Fail	Fail	Fail	Fail	Fail	Fail	Fail	Ixodes ricinus
DK	DK-604	37	Fail	Fail	Fail	Fail	Fail	Fail	Fail	Fail	Fail	Fail	Fail	Fail	Fail	Pass	Pass	Ixodes ricinus
DK	DK-604	38	Fail	Pass	Fail	Pass	Pass	Fail	Pass	Fail	Fail	Fail	Fail	Fail	Fail	Pass	Pass	Ixodes ricinus
DK	DK-604	39	Fail	Pass	Fail	Fail	Pass	Fail	Pass	Fail	Pass	Fail	Fail	Fail	Fail	Pass	Pass	Ixodes ricinus
DK	DK-604	40	Fail	Pass	Pass	Fail	Pass	Fail	Pass	Fail	Fail	Fail	Fail	Fail	Pass	Pass	Pass	Ixodes ricinus
DK	DK-604	41	Fail	Pass	Pass	Fail	Fail	Fail	Fail	Fail	Fail	Fail	Fail	Fail	Fail	Pass	Pass	Ixodes ricinus
DK	DK-604	42	Fail	Pass	Pass	Fail	Pass	Fail	Fail	Pass	Pass	Fail	Fail	Fail	Fail	Pass	Pass	Ixodes ricinus
DK	DK-604	43	Fail	Pass	Fail	Fail	Pass	Fail	Pass	Pass	Fail	Fail	Fail	Fail	Fail	Pass	Pass	Ixodes ricinus
DK	DK-604	44	Fail	Pass	Pass	Fail	Pass	Fail	Fail	Fail	Fail	Fail	Fail	Fail	Fail	Fail	Fail	Ixodes ricinus
DK	DK-604	45	Fail	Fail	Fail	Fail	Fail	Fail	Fail	Fail	Fail	Fail	Fail	Fail	Fail	Fail	Fail	Ixodes ricinus
DK	DK-604	46	Fail	Pass	Pass	Fail	Fail	Fail	Fail	Fail	Fail	Fail	Fail	Fail	Fail	Fail	Fail	Ixodes ricinus
DK	DK-604	47	Fail	Pass	Fail	Fail	Pass	Fail	Pass	Pass	Fail	Fail	Fail	Fail	Fail	Pass	Pass	Ixodes ricinus
DK	DK-604	48	Fail	Fail	Fail	Fail	Fail	Fail	Fail	Fail	Fail	Fail	Fail	Fail	Fail	Fail	Fail	Ixodes ricinus
DK	DK-604	49	Fail	Pass	Pass	Fail	Fail	Fail	Fail	Fail	Fail	Fail	Fail	Fail	Pass	Fail	Fail	Ixodes ricinus
DK	DK-604	50	Fail	Pass	Fail	Fail	Pass	Fail	Pass	Fail	Pass	Fail	Fail	Fail	Fail	Fail	Fail	Ixodes ricinus
DK	DK-604	51	Fail	Fail	Fail	Fail	Fail	Fail	Fail	Fail	Fail	Fail	Fail	Fail	Pass	Pass	Pass	Ixodes ricinus
DK	DK-604	52	Fail	Pass	Pass	Fail	Fail	Fail	Fail	Fail	Fail	Fail	Fail	Fail	Fail	Fail	Fail	Ixodes ricinus
DK	DK-604	53	Fail	Pass	Fail	Fail	Pass	Fail	Pass	Fail	Fail	Fail	Fail	Fail	Pass	Fail	Fail	Ixodes ricinus
DK	DK-604	54	Fail	Pass	Pass	Fail	Pass	Fail	Pass	Fail	Fail	Fail	Fail	Fail	Pass	Fail	Fail	Ixodes ricinus
DK	DK-604	55	Fail	Pass	Pass	Fail	Fail	Fail	Fail	Fail	Fail	Fail	Fail	Fail	Fail	Pass	Pass	Ixodes ricinus
DK	DK-604	56	Pass	Pass	Pass	Fail	Pass	Fail	Fail	Pass	Fail	Fail	Fail	Fail	Fail	Pass	Pass	Ixodes ricinus
DK	DK-604	57	Fail	Pass	Pass	Fail	Fail	Fail	Fail	Fail	Fail	Fail	Fail	Fail	Pass	Pass	Pass	Ixodes ricinus
DK	DK-604	58	Fail	Pass	Pass	Fail	Pass	Fail	Pass	Fail	Fail	Fail	Fail	Fail	Fail	Pass	Pass	Ixodes ricinus
DK	DK-604	59	Fail	Pass	Pass	Fail	Fail	Fail	Fail	Fail	Fail	Fail	Fail	Fail	Fail	Pass	Pass	Ixodes ricinus
DK	DK-604	60	Fail	Pass	Pass	Fail	Pass	Fail	Fail	Pass	Fail	Fail	Fail	Fail	Pass	Pass	Pass	Ixodes ricinus
DK	DK-605	1	Fail	Fail	Fail	Fail	Fail	Fail	Fail	Fail	Fail	Fail	Fail	Fail	Fail	Fail	Fail	Ixodes ricinus
DK	DK-605	2	Fail	Fail	Fail	Fail	Fail	Fail	Fail	Fail	Fail	Fail	Fail	Fail	Fail	Fail	Fail	Ixodes ricinus
DK	DK-605	3	Fail	Pass	Pass	Fail	Pass	Fail	Pass	Pass	Fail	Fail	Fail	Fail	Pass	Fail	Fail	Ixodes ricinus
DK	DK-605	4	Fail	Fail	Fail	Fail	Fail	Fail	Fail	Fail	Fail	Fail	Fail	Fail	Fail	Pass	Pass	Ixodes ricinus
DK	DK-605	5	Fail	Fail	Fail	Fail	Fail	Fail	Fail	Fail	Fail	Fail	Fail	Fail	Fail	Fail	Fail	Ixodes ricinus
DK	DK-605	6	Fail	Pass	Pass	Fail	Pass	Fail	Fail	Fail	Fail	Fail	Fail	Fail	Fail	Fail	Fail	Ixodes ricinus
DK	DK-605	7	Fail	Pass	Fail	Fail	Fail	Fail	Fail	Fail	Fail	Fail	Fail	Fail	Fail	Pass	Pass	Ixodes ricinus
DK	DK-605	8	Fail	Pass	Fail	Fail	Fail	Fail	Fail	Fail	Fail	Fail	Fail	Fail	Fail	Pass	Pass	Ixodes ricinus
DK	DK-605	9	Fail	Fail	Fail	Fail	Fail	Fail	Fail	Fail	Fail	Fail	Fail	Fail	Fail	Fail	Fail	Ixodes ricinus
DK	DK-605	10	Fail	Pass	Pass	Fail	Fail	Fail	Fail	Fail	Fail	Fail	Fail	Fail	Fail	Pass	Pass	Ixodes ricinus
DK	DK-605	11	Fail	Fail	Fail	Fail	Fail	Fail	Fail	Fail	Fail	Fail	Fail	Fail	Fail	Pass	Pass	Ixodes ricinus
DK	DK-605	12	Fail	Pass	Pass	Fail	Fail	Fail	Fail	Fail	Fail	Fail	Fail	Fail	Fail	Pass	Pass	Ixodes ricinus
DK	DK-605	13	Fail	Fail	Pass	Fail	Fail	Fail	Fail	Fail	Fail	Fail	Fail	Fail	Fail	Fail	Fail	Ixodes ricinus
DK	DK-605	14	Fail	Fail	Fail	Fail	Fail	Fail	Fail	Fail	Fail	Fail	Fail	Fail	Fail	Pass	Pass	Ixodes ricinus
DK	DK-605	15	Fail	Pass	Pass	Fail	Fail	Fail	Fail	Fail	Fail	Fail	Fail	Fail	Pass	Pass	Pass	Ixodes ricinus
DK	DK-605	16	Fail	Pass	Fail	Fail	Fail	Fail	Fail	Fail	Fail	Fail	Fail	Fail	Fail	Pass	Pass	Ixodes ricinus
DK	DK-605	17	Fail	Pass	Fail	Fail	Fail	Fail	Fail	Fail	Fail	Fail	Fail	Fail	Fail	Pass	Fail	Ixodes ricinus
DK	DK-605	18	Fail	Fail	Fail	Fail	Fail	Fail	Fail	Fail	Fail	Fail	Fail	Fail	Fail	Pass	Pass	Ixodes ricinus
DK	DK-605	19	Fail	Fail	Fail	Fail	Fail	Fail	Fail	Fail	Fail	Fail	Fail	Fail	Fail	Fail	Pass	Ixodes ricinus
DK	DK-605	20	Fail	Pass	Pass	Fail	Fail	Fail	Fail	Fail	Fail	Fail	Fail	Fail	Pass	Pass	Pass	Ixodes ricinus
DK	DK-605	21	Fail	Fail	Fail	Fail	Fail	Fail	Fail	Fail	Fail	Fail	Fail	Fail	Fail	Fail	Fail	Ixodes ricinus
DK	DK-605	22	Fail	Pass	Pass	Fail	Fail	Fail	Fail	Fail	Fail	Fail	Fail	Fail	Pass	Fail	Fail	Ixodes ricinus
DK	DK-605	23	Fail	Fail	Fail	Fail	Fail	Fail	Fail	Fail	Fail	Fail	Fail	Fail	Fail	Pass	Pass	Ixodes ricinus
DK	DK-605	24	Fail	Pass	Pass	Fail	Fail	Fail	Fail	Fail	Fail	Fail	Fail	Fail	Fail	Fail	Fail	Ixodes ricinus
DK	DK-605	25	Fail	Pass	Pass	Fail	Fail	Fail	Fail	Fail	Fail	Fail	Fail	Fail	Pass	Pass	Pass	Ixodes ricinus
DK	DK-605	26	Pass	Pass	Pass	Fail	Fail	Fail	Fail	Fail	Fail	Fail	Fail	Fail	Pass	Fail	Fail	Ixodes ricinus
DK	DK-605	27	Fail	Pass	Fail	Fail	Pass	Fail	Fail	Fail	Fail	Fail	Fail	Fail	Fail	Pass	Pass	Ixodes ricinus
DK	DK-605	28	Fail	Fail	Fail	Fail	Fail	Fail	Fail	Fail	Fail	Fail	Fail	Fail	Fail	Pass	Pass	Ixodes ricinus
DK	DK-605	29	Fail	Fail	Fail	Fail	Fail	Fail	Fail	Fail	Fail	Fail	Fail	Fail	Fail	Fail	Fail	Ixodes ricinus
DK	DK-605	30	Fail	Fail	Fail	Fail	Fail	Fail	Fail	Fail	Fail	Fail	Fail	Fail	Fail	Pass	Pass	Ixodes ricinus
DK	DK-605	31	Fail	Fail	Fail	Fail	Fail	Fail	Fail	Fail	Fail	Fail	Fail	Fail	Pass	Fail	Fail	Ixodes ricinus
DK	DK-605	32	Fail	Fail	Fail	Fail	Fail	Fail	Fail	Fail	Fail	Fail	Fail	Fail	Pass	Fail	Fail	Ixodes ricinus
DK	DK-605	33	Fail	Fail	Fail	Fail	Fail	Fail	Fail	Fail	Fail	Fail	Fail	Fail	Fail	Pass	Pass	Ixodes ricinus
DK	DK-605	34	Fail	Pass	Fail	Fail	Fail	Fail	Fail	Fail	Fail	Fail	Fail	Fail	Fail	Pass	Pass	Ixodes ricinus
DK	DK-605	35	Fail	Pass	Pass	Fail	Fail	Fail	Fail	Fail	Fail	Fail	Fail	Fail	Pass	Fail	Fail	Ixodes ricinus
DK	DK-605	36	Fail	Pass	Pass	Fail	Fail	Fail	Fail	Fail	Fail	Fail	Fail	Fail	Pass	Fail	Fail	Ixodes ricinus
DK	DK-605	37	Fail	Pass	Fail	Fail	Pass	Fail	Pass	Fail	Fail	Fail	Fail	Fail	Fail	Pass	Pass	Ixodes ricinus
DK	DK-605	38	Fail	Fail	Fail	Fail	Fail	Fail	Fail	Fail	Fail	Fail	Fail	Fail	Fail	Pass	Pass	Ixodes ricinus
DK	DK-605	39	Fail	Fail	Fail	Fail	Fail	Fail	Fail	Fail	Fail	Fail	Fail	Fail	Fail	Fail	Fail	Ixodes ricinus
DK	DK-605	40	Fail	Pass	Pass	Fail	Fail	Fail	Fail	Fail	Fail	Fail	Fail	Fail	Fail	Pass	Pass	Ixodes ricinus
DK	DK-605	41	Fail	Fail	Fail	Fail	Fail	Fail	Fail	Fail	Fail	Fail	Fail	Fail	Fail	Pass	Pass	Ixodes ricinus
DK	DK-605	42	Fail	Fail	Fail	Fail	Fail	Fail	Fail	Fail	Fail	Fail	Fail	Fail	Fail	Fail	Fail	Ixodes ricinus
DK	DK-605	43	Fail	Pass	Pass	Fail	Fail	Fail	Fail	Fail	Fail	Fail	Fail	Fail	Fail	Fail	Fail	Ixodes ricinus
DK	DK-605	44	Fail	Pass	Pass	Fail	Fail	Fail	Fail	Pass	Fail	Fail	Fail	Fail	Pass	Pass	Pass	Ixodes ricinus
DK	DK-605	45	Fail	Fail	Fail	Fail	Fail	Fail	Fail	Fail	Fail	Fail	Fail	Fail	Fail	Pass	Pass	Ixodes ricinus
DK	DK-605	46	Fail	Pass	Pass	Fail	Fail	Fail	Fail	Fail	Fail	Fail	Fail	Fail	Fail	Fail	Fail	Ixodes ricinus
DK	DK-605	47	Fail	Fail	Fail	Fail	Fail	Fail	Fail	Fail	Fail	Fail	Fail	Fail	Fail	Fail	Fail	Ixodes ricinus
DK	DK-605	48	Fail	Pass	Pass	Fail	Fail	Fail	Fail	Fail	Fail	Fail	Fail	Fail	Pass	Pass	Pass	Ixodes ricinus
DK	DK-605	49	Fail	Fail	Fail	Fail	Fail	Fail	Fail	Fail	Fail	Fail	Fail	Fail	Fail	Pass	Pass	Ixodes ricinus
DK	DK-605	50	Fail	Pass	Pass	Fail	Pass	Fail	Fail	Fail	Fail	Fail	Fail	Pass	Fail	Fail	Fail	Ixodes ricinus
DK	DK-605	51	Fail	Pass	Pass	Fail	Fail	Fail	Fail	Fail	Fail	Fail	Fail	Fail	Fail	Pass	Pass	Ixodes ricinus
DK	DK-605	52	Fail	Pass	Pass	Fail	Pass	Fail	Pass	Fail	Fail	Fail	Fail	Fail	Fail	Fail	Fail	Ixodes ricinus
DK	DK-605	53	Fail	Fail	Fail	Fail	Fail	Fail	Fail	Fail	Fail	Fail	Fail	Fail	Fail	Pass	Pass	Ixodes ricinus
DK	DK-605	54	Fail	Fail	Fail	Fail	Fail	Fail	Fail	Fail	Fail	Fail	Fail	Fail	Fail	Pass	Pass	Ixodes ricinus
DK	DK-605	55	Fail	Pass	Pass	Fail	Fail	Fail	Fail	Fail	Fail	Fail	Fail	Fail	Pass	Fail	Fail	Ixodes ricinus
DK	DK-605	56	Fail	Pass	Fail	Fail	Pass	Fail	Fail	Pass	Fail	Fail	Fail	Fail	Pass	Pass	Pass	Ixodes ricinus
DK	DK-605	57	Fail	Pass	Pass	Fail	Pass	Fail	Fail	Fail	Fail	Fail	Fail	Fail	Fail	Fail	Fail	Ixodes ricinus
DK	DK-605	58	Fail	Pass	Fail	Fail	Pass	Fail	Fail	Pass	Fail	Fail	Fail	Pass	Fail	Fail	Fail	Ixodes ricinus
DK	DK-616	1	Fail	Fail	Fail	Fail	Fail	Fail	Fail	Fail	Fail	Fail	Fail	Fail	Fail	Pass	Pass	Ixodes ricinus
DK	DK-616	2	Fail	Pass	Fail	Fail	Pass	Fail	Fail	Pass	Fail	Fail	Fail	Fail	Fail	Pass	Pass	Ixodes ricinus
DK	DK-616	3	Fail	Fail	Fail	Fail	Fail	Fail	Fail	Fail	Pass	Fail	Fail	Fail	Fail	Fail	Fail	Ixodes ricinus
DK	DK-616	4	Fail	Fail	Fail	Fail	Fail	Fail	Fail	Fail	Fail	Fail	Fail	Fail	Fail	Fail	Fail	Ixodes ricinus
DK	DK-616	5	Fail	Pass	Pass	Fail	Pass	Fail	Pass	Fail	Pass	Fail	Fail	Fail	Fail	Pass	Pass	Ixodes ricinus
DK	DK-616	6	Fail	Fail	Fail	Fail	Fail	Fail	Fail	Fail	Pass	Fail	Fail	Fail	Fail	Pass	Pass	Ixodes ricinus
DK	DK-616	7	Fail	Pass	Fail	Fail	Pass	Fail	Fail	Pass	Fail	Fail	Fail	Fail	Fail	Fail	Fail	Ixodes ricinus
DK	DK-616	8	Fail	Fail	Fail	Fail	Fail	Fail	Fail	Fail	Pass	Fail	Fail	Fail	Fail	Fail	Fail	Ixodes ricinus
DK	DK-616	9	Fail	Fail	Fail	Fail	Fail	Fail	Fail	Fail	Fail	Fail	Fail	Fail	Fail	Pass	Pass	Ixodes ricinus
DK	DK-616	10	Fail	Fail	Fail	Fail	Fail	Fail	Fail	Fail	Fail	Fail	Fail	Fail	Fail	Pass	Pass	Ixodes ricinus
DK	DK-616	11	Fail	Fail	Fail	Fail	Fail	Fail	Fail	Fail	Fail	Fail	Fail	Fail	Fail	Fail	Pass	Ixodes ricinus
DK	DK-616	12	Fail	Fail	Fail	Fail	Fail	Fail	Fail	Fail	Fail	Fail	Fail	Fail	Fail	Fail	Fail	Ixodes ricinus
DK	DK-616	13	Fail	Fail	Fail	Fail	Fail	Fail	Fail	Fail	Fail	Fail	Fail	Fail	Fail	Fail	Fail	Ixodes ricinus
DK	DK-616	14	Fail	Fail	Fail	Fail	Fail	Fail	Fail	Fail	Pass	Fail	Fail	Fail	Fail	Fail	Pass	Ixodes ricinus
DK	DK-616	15	Fail	Pass	Fail	Fail	Pass	Fail	Pass	Fail	Pass	Fail	Fail	Fail	Fail	Fail	Fail	Ixodes ricinus
DK	DK-616	16	Fail	Fail	Fail	Fail	Fail	Fail	Fail	Fail	Fail	Fail	Fail	Fail	Fail	Fail	Fail	Ixodes ricinus
DK	DK-616	17	Fail	Fail	Fail	Fail	Fail	Fail	Fail	Fail	Fail	Fail	Fail	Fail	Fail	Fail	Fail	Ixodes ricinus
DK	DK-616	18	Fail	Pass	Fail	Fail	Pass	Fail	Pass	Fail	Fail	Fail	Fail	Fail	Fail	Fail	Pass	Ixodes ricinus
DK	DK-616	19	Fail	Pass	Fail	Fail	Pass	Fail	Pass	Fail	Fail	Fail	Fail	Fail	Fail	Pass	Pass	Ixodes ricinus
DK	DK-616	20	Fail	Pass	Fail	Fail	Pass	Fail	Fail	Pass	Fail	Fail	Fail	Fail	Fail	Fail	Fail	Ixodes ricinus
DK	DK-616	21	Fail	Fail	Fail	Fail	Fail	Fail	Fail	Fail	Pass	Fail	Fail	Fail	Fail	Pass	Pass	Ixodes ricinus
DK	DK-616	22	Fail	Fail	Fail	Fail	Fail	Fail	Fail	Fail	Pass	Fail	Fail	Fail	Fail	Fail	Pass	Ixodes ricinus
DK	DK-616	23	Fail	Fail	Fail	Fail	Fail	Fail	Fail	Fail	Fail	Fail	Fail	Fail	Fail	Pass	Pass	Ixodes ricinus
DK	DK-616	24	Fail	Pass	Fail	Fail	Pass	Fail	Pass	Fail	Fail	Fail	Fail	Fail	Fail	Fail	Fail	Ixodes ricinus
DK	DK-616	25	Fail	Pass	Fail	Fail	Fail	Fail	Fail	Fail	Fail	Fail	Fail	Fail	Fail	Pass	Pass	Ixodes ricinus
DK	DK-616	26	Fail	Pass	Fail	Fail	Fail	Fail	Fail	Fail	Pass	Fail	Fail	Pass	Fail	Pass	Pass	Ixodes ricinus
DK	DK-616	27	Fail	Pass	Fail	Fail	Pass	Fail	Pass	Fail	Fail	Fail	Fail	Fail	Fail	Fail	Fail	Ixodes ricinus
DK	DK-616	28	Fail	Fail	Fail	Fail	Fail	Fail	Fail	Fail	Pass	Fail	Fail	Fail	Fail	Pass	Pass	Ixodes ricinus
DK	DK-616	29	Fail	Fail	Fail	Fail	Fail	Fail	Fail	Fail	Pass	Fail	Fail	Fail	Fail	Fail	Fail	Ixodes ricinus
DK	DK-616	30	Fail	Pass	Fail	Fail	Pass	Fail	Fail	Fail	Pass	Fail	Fail	Fail	Fail	Pass	Pass	Ixodes ricinus
DK	DK-616	31	Fail	Fail	Fail	Fail	Fail	Fail	Fail	Fail	Pass	Fail	Fail	Fail	Fail	Fail	Fail	Ixodes ricinus
DK	DK-616	32	Fail	Pass	Fail	Fail	Pass	Fail	Pass	Fail	Pass	Fail	Fail	Fail	Fail	Pass	Pass	Ixodes ricinus
DK	DK-616	33	Fail	Pass	Fail	Pass	Fail	Fail	Fail	Pass	Fail	Fail	Fail	Fail	Fail	Fail	Fail	Ixodes ricinus
DK	DK-616	34	Fail	Pass	Fail	Fail	Pass	Fail	Fail	Fail	Pass	Fail	Fail	Fail	Fail	Pass	Pass	Ixodes ricinus
DK	DK-616	35	Fail	Fail	Fail	Fail	Fail	Fail	Fail	Fail	Pass	Fail	Fail	Fail	Fail	Pass	Fail	Ixodes ricinus
DK	DK-616	36	Fail	Pass	Fail	Fail	Pass	Fail	Fail	Fail	Pass	Pass	Fail	Fail	Fail	Pass	Pass	Ixodes ricinus
DK	DK-616	37	Fail	Fail	Fail	Fail	Fail	Fail	Fail	Fail	Pass	Pass	Fail	Fail	Fail	Pass	Pass	Ixodes ricinus
DK	DK-616	38	Fail	Fail	Fail	Fail	Fail	Fail	Fail	Fail	Fail	Fail	Fail	Fail	Fail	Fail	Fail	Ixodes ricinus
DK	DK-616	39	Fail	Fail	Fail	Fail	Fail	Fail	Fail	Fail	Fail	Fail	Fail	Fail	Fail	Pass	Fail	Ixodes ricinus
DK	DK-616	40	Fail	Fail	Fail	Fail	Fail	Fail	Fail	Fail	Pass	Fail	Fail	Fail	Fail	Pass	Pass	Ixodes ricinus
DK	DK-616	41	Fail	Fail	Fail	Fail	Fail	Fail	Fail	Fail	Pass	Fail	Fail	Fail	Fail	Pass	Pass	Ixodes ricinus
DK	DK-616	42	Fail	Fail	Fail	Fail	Fail	Fail	Fail	Fail	Pass	Fail	Fail	Fail	Fail	Pass	Pass	Ixodes ricinus
DK	DK-616	43	Fail	Pass	Fail	Fail	Fail	Fail	Fail	Pass	Pass	Fail	Fail	Fail	Fail	Pass	Pass	Ixodes ricinus
DK	DK-616	44	Fail	Fail	Fail	Fail	Fail	Fail	Fail	Fail	Fail	Fail	Fail	Fail	Fail	Pass	Pass	Ixodes ricinus
DK	DK-616	45	Fail	Pass	Fail	Fail	Pass	Fail	Pass	Fail	Fail	Fail	Fail	Fail	Fail	Pass	Pass	Ixodes ricinus
DK	DK-616	46	Fail	Fail	Fail	Fail	Fail	Fail	Fail	Fail	Pass	Fail	Fail	Fail	Fail	Fail	Pass	Ixodes ricinus
DK	DK-616	47	Fail	Fail	Fail	Fail	Fail	Fail	Fail	Fail	Pass	Fail	Fail	Fail	Fail	Pass	Pass	Ixodes ricinus
DK	DK-616	48	Fail	Pass	Fail	Fail	Pass	Fail	Pass	Fail	Fail	Fail	Fail	Fail	Fail	Pass	Pass	Ixodes ricinus
DK	DK-616	49	Fail	Pass	Pass	Fail	Pass	Fail	Fail	Fail	Fail	Fail	Fail	Fail	Fail	Pass	Pass	Ixodes ricinus
DK	DK-616	50	Fail	Fail	Fail	Fail	Fail	Fail	Fail	Fail	Fail	Fail	Fail	Fail	Fail	Pass	Fail	Ixodes ricinus
DK	DK-616	51	Fail	Pass	Fail	Fail	Pass	Fail	Fail	Pass	Fail	Fail	Fail	Fail	Fail	Fail	Pass	Ixodes ricinus
DK	DK-616	52	Fail	Fail	Fail	Fail	Fail	Fail	Fail	Fail	Fail	Fail	Fail	Fail	Fail	Pass	Pass	Ixodes ricinus
DK	DK-616	53	Fail	Pass	Fail	Fail	Pass	Fail	Fail	Fail	Fail	Fail	Fail	Fail	Fail	Pass	Pass	Ixodes ricinus
DK	DK-616	54	Fail	Fail	Fail	Fail	Fail	Fail	Fail	Fail	Pass	Fail	Fail	Fail	Fail	Pass	Fail	Ixodes ricinus
DK	DK-616	55	Fail	Fail	Fail	Fail	Fail	Fail	Fail	Fail	Pass	Fail	Fail	Fail	Fail	Fail	Fail	Ixodes ricinus
DK	DK-616	56	Fail	Pass	Fail	Fail	Pass	Fail	Fail	Pass	Fail	Fail	Fail	Fail	Fail	Fail	Fail	Ixodes ricinus
DK	DK-616	57	Fail	Fail	Fail	Fail	Fail	Fail	Fail	Fail	Fail	Fail	Fail	Fail	Fail	Fail	Fail	Ixodes ricinus
DK	DK-616	58	Fail	Pass	Fail	Fail	Fail	Fail	Fail	Fail	Fail	Fail	Fail	Fail	Fail	Pass	Pass	Ixodes ricinus
DK	DK-616	59	Fail	Fail	Fail	Fail	Fail	Fail	Fail	Fail	Fail	Fail	Fail	Fail	Fail	Pass	Pass	Ixodes ricinus
DK	DK-616	60	Fail	Pass	Fail	Fail	Pass	Fail	Pass	Fail	Pass	Fail	Fail	Fail	Fail	Pass	Pass	Ixodes ricinus
DK	DK-677	1	Fail	Pass	Pass	Fail	Fail	Fail	Fail	Fail	Fail	Fail	Fail	Fail	Fail	Pass	Pass	Ixodes ricinus
DK	DK-677	2	Fail	Fail	Fail	Fail	Fail	Fail	Fail	Fail	Fail	Fail	Fail	Fail	Pass	Fail	Fail	Ixodes ricinus
DK	DK-677	3	Fail	Pass	Pass	Fail	Fail	Fail	Fail	Fail	Fail	Fail	Fail	Fail	Pass	Pass	Pass	Ixodes ricinus
DK	DK-677	4	Fail	Fail	Fail	Fail	Fail	Fail	Fail	Fail	Fail	Fail	Fail	Pass	Fail	Fail	Fail	Ixodes ricinus
DK	DK-677	5	Fail	Pass	Pass	Fail	Fail	Fail	Fail	Fail	Fail	Fail	Fail	Fail	Pass	Pass	Pass	Ixodes ricinus
DK	DK-677	6	Fail	Fail	Fail	Fail	Fail	Fail	Fail	Fail	Fail	Fail	Fail	Fail	Fail	Fail	Pass	Ixodes ricinus
DK	DK-677	7	Fail	Pass	Pass	Fail	Fail	Fail	Fail	Fail	Fail	Fail	Fail	Fail	Pass	Pass	Pass	Ixodes ricinus
DK	DK-677	8	Fail	Pass	Pass	Fail	Fail	Fail	Fail	Fail	Fail	Fail	Fail	Fail	Fail	Pass	Pass	Ixodes ricinus
DK	DK-677	9	Fail	Pass	Pass	Fail	Fail	Fail	Pass	Fail	Fail	Fail	Fail	Fail	Fail	Fail	Fail	Ixodes ricinus
DK	DK-677	10	Fail	Fail	Fail	Fail	Fail	Fail	Fail	Fail	Pass	Fail	Fail	Fail	Fail	Fail	Fail	Ixodes ricinus
DK	DK-677	11	Fail	Pass	Pass	Fail	Fail	Fail	Fail	Fail	Fail	Fail	Fail	Fail	Pass	Fail	Fail	Ixodes ricinus
DK	DK-677	12	Fail	Pass	Pass	Fail	Fail	Fail	Fail	Fail	Fail	Fail	Fail	Fail	Pass	Pass	Pass	Ixodes ricinus
DK	DK-677	13	Fail	Pass	Pass	Fail	Fail	Fail	Fail	Fail	Fail	Fail	Fail	Fail	Pass	Pass	Pass	Ixodes ricinus
DK	DK-677	14	Fail	Fail	Fail	Fail	Fail	Fail	Fail	Fail	Fail	Fail	Fail	Fail	Fail	Fail	Fail	Ixodes ricinus
DK	DK-677	15	Fail	Pass	Pass	Fail	Fail	Fail	Pass	Fail	Fail	Pass	Fail	Fail	Pass	Pass	Pass	Ixodes ricinus
DK	DK-677	16	Fail	Pass	Pass	Fail	Fail	Fail	Fail	Fail	Fail	Fail	Fail	Fail	Pass	Fail	Fail	Ixodes ricinus
DK	DK-677	17	Fail	Pass	Pass	Fail	Fail	Fail	Fail	Fail	Fail	Fail	Fail	Fail	Fail	Pass	Pass	Ixodes ricinus
DK	DK-677	18	Fail	Pass	Pass	Fail	Fail	Fail	Fail	Fail	Fail	Fail	Fail	Fail	Fail	Fail	Fail	Ixodes ricinus
DK	DK-677	19	Fail	Pass	Pass	Fail	Fail	Fail	Fail	Fail	Fail	Fail	Fail	Fail	Fail	Fail	Fail	Ixodes ricinus
DK	DK-677	20	Fail	Fail	Fail	Fail	Fail	Fail	Fail	Fail	Fail	Fail	Fail	Fail	Fail	Pass	Pass	Ixodes ricinus
DK	DK-677	21	Fail	Fail	Fail	Fail	Fail	Fail	Fail	Fail	Fail	Fail	Fail	Fail	Fail	Fail	Fail	Ixodes ricinus
DK	DK-677	22	Fail	Pass	Pass	Fail	Fail	Fail	Fail	Fail	Fail	Fail	Fail	Fail	Pass	Fail	Fail	Ixodes ricinus
DK	DK-677	23	Fail	Fail	Fail	Fail	Fail	Fail	Fail	Fail	Fail	Fail	Fail	Fail	Fail	Pass	Pass	Ixodes ricinus
DK	DK-677	24	Fail	Fail	Fail	Fail	Fail	Fail	Fail	Fail	Fail	Fail	Fail	Fail	Fail	Fail	Fail	Ixodes ricinus
DK	DK-677	25	Fail	Pass	Pass	Fail	Fail	Fail	Fail	Fail	Fail	Fail	Fail	Pass	Pass	Pass	Pass	Ixodes ricinus
DK	DK-677	26	Fail	Fail	Fail	Fail	Fail	Fail	Fail	Fail	Fail	Fail	Fail	Fail	Fail	Pass	Pass	Ixodes ricinus
DK	DK-677	27	Fail	Fail	Fail	Fail	Fail	Fail	Fail	Fail	Fail	Fail	Fail	Fail	Fail	Pass	Pass	Ixodes ricinus
DK	DK-677	28	Fail	Pass	Pass	Fail	Fail	Fail	Fail	Fail	Fail	Fail	Fail	Fail	Pass	Pass	Pass	Ixodes ricinus
DK	DK-677	29	Fail	Fail	Fail	Fail	Fail	Fail	Fail	Fail	Fail	Fail	Fail	Fail	Fail	Pass	Pass	Ixodes ricinus
DK	DK-677	30	Fail	Fail	Fail	Fail	Fail	Fail	Fail	Fail	Fail	Fail	Fail	Fail	Fail	Pass	Pass	Ixodes ricinus
DK	DK-677	31	Fail	Pass	Pass	Fail	Fail	Fail	Fail	Fail	Fail	Fail	Fail	Fail	Pass	Fail	Fail	Ixodes ricinus
DK	DK-677	32	Fail	Pass	Pass	Fail	Fail	Fail	Fail	Fail	Fail	Fail	Fail	Fail	Pass	Pass	Pass	Ixodes ricinus
DK	DK-677	33	Fail	Pass	Pass	Fail	Pass	Fail	Pass	Fail	Fail	Fail	Fail	Fail	Fail	Fail	Fail	Ixodes ricinus
DK	DK-677	34	Fail	Pass	Pass	Fail	Fail	Fail	Fail	Fail	Fail	Fail	Fail	Fail	Pass	Fail	Fail	Ixodes ricinus
DK	DK-677	35	Fail	Fail	Fail	Fail	Fail	Fail	Fail	Fail	Fail	Fail	Fail	Fail	Fail	Fail	Fail	Ixodes ricinus
DK	DK-677	36	Fail	Fail	Fail	Fail	Fail	Fail	Fail	Fail	Fail	Fail	Fail	Fail	Pass	Pass	Pass	Ixodes ricinus
DK	DK-677	37	Fail	Pass	Pass	Fail	Fail	Fail	Fail	Fail	Fail	Fail	Fail	Fail	Pass	Pass	Pass	Ixodes ricinus
DK	DK-677	38	Fail	Pass	Pass	Fail	Fail	Fail	Fail	Fail	Fail	Fail	Fail	Fail	Fail	Pass	Pass	Ixodes ricinus
DK	DK-677	39	Fail	Pass	Pass	Fail	Fail	Fail	Fail	Fail	Fail	Fail	Fail	Fail	Pass	Pass	Pass	Ixodes ricinus
DK	DK-677	40	Fail	Pass	Pass	Fail	Fail	Fail	Fail	Fail	Fail	Fail	Fail	Fail	Fail	Fail	Fail	Ixodes ricinus
DK	DK-677	41	Fail	Pass	Pass	Fail	Pass	Fail	Pass	Fail	Fail	Fail	Fail	Fail	Fail	Fail	Fail	Ixodes ricinus
DK	DK-677	42	Fail	Pass	Pass	Fail	Fail	Fail	Fail	Fail	Fail	Fail	Fail	Fail	Pass	Fail	Fail	Ixodes ricinus
DK	DK-677	43	Fail	Pass	Pass	Fail	Fail	Fail	Fail	Fail	Fail	Fail	Fail	Fail	Fail	Fail	Fail	Ixodes ricinus
DK	DK-677	44	Fail	Fail	Fail	Fail	Fail	Fail	Fail	Fail	Fail	Fail	Fail	Fail	Fail	Fail	Fail	Ixodes ricinus
DK	DK-677	45	Fail	Pass	Pass	Fail	Fail	Fail	Pass	Fail	Fail	Fail	Fail	Fail	Fail	Fail	Fail	Ixodes ricinus
DK	DK-677	46	Fail	Pass	Pass	Fail	Fail	Fail	Fail	Fail	Fail	Fail	Fail	Pass	Fail	Pass	Pass	Ixodes ricinus
DK	DK-677	47	Fail	Pass	Pass	Fail	Fail	Fail	Fail	Fail	Pass	Fail	Fail	Fail	Pass	Pass	Pass	Ixodes ricinus
DK	DK-677	48	Fail	Pass	Pass	Fail	Fail	Fail	Fail	Fail	Fail	Fail	Fail	Fail	Fail	Fail	Fail	Ixodes ricinus
DK	DK-677	49	Fail	Pass	Pass	Fail	Fail	Fail	Fail	Fail	Fail	Fail	Fail	Fail	Pass	Fail	Fail	Ixodes ricinus
DK	DK-677	50	Fail	Pass	Pass	Fail	Fail	Fail	Fail	Fail	Fail	Fail	Fail	Fail	Fail	Pass	Pass	Ixodes ricinus
DK	DK-677	51	Fail	Pass	Pass	Fail	Fail	Fail	Fail	Fail	Fail	Fail	Fail	Fail	Pass	Fail	Fail	Ixodes ricinus
DK	DK-677	52	Fail	Pass	Pass	Fail	Fail	Fail	Fail	Fail	Fail	Fail	Fail	Fail	Fail	Fail	Fail	Ixodes ricinus
DK	DK-677	53	Fail	Pass	Pass	Fail	Fail	Fail	Fail	Fail	Fail	Fail	Fail	Fail	Pass	Fail	Fail	Ixodes ricinus
DK	DK-677	54	Fail	Pass	Pass	Fail	Fail	Fail	Fail	Fail	Fail	Fail	Fail	Fail	Fail	Pass	Pass	Ixodes ricinus
DK	DK-677	55	Fail	Pass	Pass	Fail	Fail	Fail	Fail	Fail	Fail	Fail	Fail	Fail	Fail	Fail	Fail	Ixodes ricinus
DK	DK-677	56	Fail	Fail	Fail	Fail	Fail	Fail	Fail	Fail	Fail	Fail	Fail	Fail	Pass	Pass	Pass	Ixodes ricinus
DK	DK-677	57	Fail	Pass	Pass	Fail	Fail	Fail	Fail	Fail	Fail	Fail	Fail	Fail	Fail	Pass	Pass	Ixodes ricinus
DK	DK-677	58	Fail	Pass	Pass	Fail	Fail	Fail	Fail	Fail	Fail	Fail	Fail	Fail	Pass	Fail	Fail	Ixodes ricinus
DK	DK-677	59	Fail	Pass	Pass	Fail	Fail	Fail	Fail	Fail	Pass	Fail	Fail	Fail	Pass	Fail	Fail	Ixodes ricinus
DK	DK-677	60	Fail	Pass	Pass	Fail	Fail	Fail	Fail	Fail	Fail	Fail	Fail	Fail	Pass	Pass	Fail	Ixodes ricinus
DK	DK-721	1	Fail	Pass	Pass	Fail	Fail	Fail	Fail	Fail	Fail	Fail	Fail	Fail	Pass	Pass	Pass	Ixodes ricinus
DK	DK-721	2	Fail	Pass	Pass	Fail	Fail	Fail	Fail	Fail	Fail	Fail	Fail	Fail	Fail	Pass	Pass	Ixodes ricinus
DK	DK-721	3	Fail	Pass	Pass	Fail	Pass	Fail	Fail	Fail	Fail	Fail	Fail	Fail	Pass	Pass	Pass	Ixodes ricinus
DK	DK-721	4	Fail	Pass	Pass	Fail	Fail	Fail	Fail	Fail	Fail	Fail	Fail	Fail	Pass	Pass	Pass	Ixodes ricinus
DK	DK-721	5	Fail	Pass	Pass	Fail	Fail	Fail	Fail	Fail	Fail	Fail	Fail	Fail	Fail	Fail	Fail	Ixodes ricinus
DK	DK-721	6	Fail	Pass	Pass	Fail	Fail	Fail	Fail	Fail	Fail	Fail	Fail	Fail	Pass	Fail	Fail	Ixodes ricinus
DK	DK-721	7	Fail	Pass	Pass	Fail	Fail	Fail	Fail	Fail	Fail	Fail	Fail	Fail	Pass	Fail	Fail	Ixodes ricinus
DK	DK-721	8	Fail	Pass	Pass	Fail	Fail	Fail	Fail	Pass	Fail	Fail	Fail	Fail	Fail	Fail	Fail	Ixodes ricinus
DK	DK-721	9	Fail	Pass	Pass	Fail	Pass	Fail	Fail	Fail	Fail	Fail	Fail	Fail	Pass	Fail	Fail	Ixodes ricinus
DK	DK-721	10	Fail	Pass	Pass	Fail	Fail	Fail	Fail	Fail	Fail	Fail	Fail	Fail	Fail	Pass	Pass	Ixodes ricinus
DK	DK-721	11	Fail	Pass	Pass	Fail	Fail	Fail	Fail	Fail	Fail	Fail	Fail	Fail	Fail	Pass	Pass	Ixodes ricinus
DK	DK-721	12	Fail	Fail	Fail	Fail	Fail	Fail	Fail	Fail	Fail	Fail	Fail	Fail	Pass	Pass	Pass	Ixodes ricinus
DK	DK-721	13	Fail	Pass	Pass	Fail	Fail	Fail	Fail	Fail	Fail	Fail	Fail	Fail	Fail	Pass	Pass	Ixodes ricinus
DK	DK-721	14	Fail	Pass	Pass	Fail	Fail	Fail	Fail	Fail	Fail	Fail	Fail	Fail	Pass	Pass	Pass	Ixodes ricinus
DK	DK-721	15	Fail	Fail	Fail	Fail	Fail	Fail	Fail	Fail	Fail	Fail	Fail	Fail	Fail	Pass	Pass	Ixodes ricinus
DK	DK-721	16	Fail	Pass	Pass	Fail	Fail	Fail	Fail	Fail	Fail	Fail	Fail	Fail	Pass	Fail	Fail	Ixodes ricinus
DK	DK-721	17	Fail	Pass	Pass	Fail	Fail	Fail	Fail	Fail	Fail	Fail	Fail	Fail	Pass	Pass	Pass	Ixodes ricinus
DK	DK-721	18	Fail	Pass	Pass	Fail	Fail	Fail	Fail	Fail	Fail	Fail	Fail	Fail	Pass	Fail	Pass	Ixodes ricinus
DK	DK-721	19	Fail	Fail	Fail	Fail	Fail	Fail	Fail	Fail	Fail	Fail	Fail	Fail	Fail	Pass	Pass	Ixodes ricinus
DK	DK-721	20	Fail	Pass	Pass	Fail	Fail	Fail	Pass	Fail	Fail	Fail	Fail	Fail	Pass	Pass	Pass	Ixodes ricinus
DK	DK-721	21	Fail	Pass	Pass	Fail	Pass	Fail	Pass	Fail	Fail	Fail	Fail	Pass	Pass	Pass	Pass	Ixodes ricinus
DK	DK-721	22	Pass	Pass	Pass	Fail	Fail	Fail	Fail	Fail	Fail	Fail	Fail	Fail	Fail	Pass	Fail	Ixodes ricinus
DK	DK-721	23	Fail	Pass	Pass	Fail	Fail	Fail	Fail	Fail	Fail	Fail	Fail	Fail	Fail	Pass	Pass	Ixodes ricinus
DK	DK-721	24	Fail	Pass	Pass	Fail	Fail	Fail	Fail	Fail	Fail	Fail	Fail	Fail	Pass	Fail	Pass	Ixodes ricinus
DK	DK-721	25	Fail	Pass	Pass	Fail	Fail	Fail	Fail	Fail	Fail	Fail	Fail	Fail	Pass	Fail	Fail	Ixodes ricinus
DK	DK-721	26	Fail	Pass	Pass	Fail	Fail	Fail	Fail	Fail	Fail	Fail	Fail	Fail	Pass	Pass	Pass	Ixodes ricinus
DK	DK-721	27	Fail	Pass	Pass	Fail	Fail	Fail	Fail	Fail	Fail	Fail	Fail	Fail	Pass	Fail	Fail	Ixodes ricinus
DK	DK-721	28	Fail	Pass	Pass	Fail	Fail	Fail	Fail	Fail	Fail	Fail	Fail	Fail	Fail	Fail	Fail	Ixodes ricinus
DK	DK-721	29	Fail	Pass	Pass	Fail	Fail	Fail	Fail	Fail	Pass	Fail	Fail	Fail	Pass	Pass	Pass	Ixodes ricinus
DK	DK-721	30	Pass	Pass	Pass	Fail	Fail	Fail	Fail	Fail	Fail	Fail	Fail	Fail	Pass	Pass	Pass	Ixodes ricinus
DK	DK-721	31	Pass	Pass	Pass	Fail	Fail	Fail	Fail	Fail	Fail	Fail	Fail	Fail	Pass	Fail	Pass	Ixodes ricinus
DK	DK-721	32	Fail	Pass	Pass	Fail	Fail	Fail	Fail	Fail	Fail	Fail	Fail	Fail	Fail	Fail	Fail	Ixodes ricinus
DK	DK-721	33	Fail	Pass	Pass	Fail	Fail	Fail	Fail	Fail	Fail	Fail	Fail	Fail	Pass	Pass	Pass	Ixodes ricinus
DK	DK-721	34	Fail	Pass	Pass	Fail	Pass	Fail	Fail	Fail	Fail	Fail	Fail	Fail	Pass	Pass	Pass	Ixodes ricinus
DK	DK-721	35	Fail	Pass	Pass	Fail	Fail	Fail	Pass	Fail	Fail	Fail	Fail	Fail	Pass	Fail	Fail	Ixodes ricinus
DK	DK-721	36	Fail	Pass	Pass	Fail	Fail	Fail	Pass	Fail	Fail	Fail	Fail	Fail	Pass	Fail	Fail	Ixodes ricinus
DK	DK-721	37	Fail	Pass	Pass	Fail	Fail	Fail	Fail	Fail	Fail	Fail	Fail	Fail	Pass	Pass	Pass	Ixodes ricinus
DK	DK-721	38	Fail	Pass	Pass	Fail	Pass	Fail	Fail	Fail	Fail	Fail	Fail	Pass	Pass	Pass	Pass	Ixodes ricinus
DK	DK-721	39	Fail	Pass	Pass	Fail	Fail	Fail	Fail	Fail	Fail	Fail	Fail	Fail	Pass	Fail	Fail	Ixodes ricinus
DK	DK-721	40	Fail	Pass	Pass	Fail	Fail	Fail	Fail	Fail	Fail	Fail	Fail	Fail	Pass	Pass	Pass	Ixodes ricinus
DK	DK-721	41	Fail	Fail	Fail	Fail	Fail	Fail	Fail	Fail	Fail	Fail	Fail	Pass	Fail	Fail	Fail	Ixodes ricinus
DK	DK-721	42	Fail	Pass	Pass	Fail	Fail	Fail	Pass	Fail	Fail	Fail	Fail	Fail	Pass	Fail	Fail	Ixodes ricinus
DK	DK-721	43	Fail	Pass	Pass	Fail	Fail	Fail	Fail	Fail	Fail	Fail	Fail	Fail	Pass	Fail	Fail	Ixodes ricinus
DK	DK-721	44	Fail	Pass	Pass	Fail	Fail	Fail	Fail	Fail	Fail	Fail	Fail	Fail	Pass	Fail	Fail	Ixodes ricinus
DK	DK-721	45	Fail	Pass	Pass	Pass	Fail	Fail	Fail	Fail	Fail	Fail	Fail	Fail	Pass	Pass	Pass	Ixodes ricinus
DK	DK-721	46	Fail	Pass	Pass	Fail	Fail	Fail	Fail	Fail	Fail	Fail	Fail	Fail	Fail	Pass	Pass	Ixodes ricinus
DK	DK-721	47	Fail	Pass	Pass	Fail	Fail	Fail	Fail	Fail	Fail	Fail	Fail	Fail	Pass	Fail	Fail	Ixodes ricinus
DK	DK-721	48	Fail	Pass	Pass	Fail	Fail	Fail	Fail	Fail	Fail	Fail	Fail	Fail	Pass	Pass	Pass	Ixodes ricinus
DK	DK-721	49	Fail	Pass	Pass	Fail	Fail	Fail	Fail	Fail	Fail	Fail	Fail	Fail	Pass	Pass	Pass	Ixodes ricinus
DK	DK-721	50	Fail	Pass	Pass	Fail	Fail	Fail	Fail	Fail	Pass	Fail	Fail	Fail	Pass	Pass	Pass	Ixodes ricinus
DK	DK-721	51	Fail	Pass	Pass	Fail	Fail	Fail	Fail	Fail	Fail	Fail	Fail	Fail	Fail	Fail	Fail	Ixodes ricinus
DK	DK-721	52	Fail	Pass	Pass	Fail	Pass	Fail	Fail	Fail	Fail	Fail	Fail	Fail	Pass	Pass	Pass	Ixodes ricinus
DK	DK-721	53	Fail	Pass	Pass	Fail	Pass	Fail	Fail	Fail	Fail	Fail	Fail	Fail	Fail	Pass	Pass	Ixodes ricinus
DK	DK-721	54	Fail	Pass	Pass	Fail	Pass	Fail	Fail	Fail	Fail	Fail	Fail	Fail	Pass	Pass	Pass	Ixodes ricinus
DK	DK-721	55	Fail	Pass	Pass	Fail	Fail	Fail	Fail	Fail	Fail	Fail	Fail	Fail	Pass	Pass	Pass	Ixodes ricinus
DK	DK-721	56	Fail	Pass	Pass	Fail	Fail	Fail	Pass	Fail	Fail	Fail	Fail	Pass	Pass	Pass	Pass	Ixodes ricinus
DK	DK-721	57	Fail	Pass	Pass	Fail	Pass	Fail	Fail	Fail	Fail	Fail	Fail	Fail	Pass	Pass	Pass	Ixodes ricinus
DK	DK-721	58	Fail	Pass	Pass	Fail	Fail	Fail	Fail	Fail	Fail	Fail	Fail	Fail	Pass	Fail	Fail	Ixodes ricinus
DK	DK-757	1	Fail	Fail	Fail	Fail	Fail	Fail	Fail	Fail	Pass	Fail	Fail	Fail	Fail	Fail	Fail	Ixodes ricinus
DK	DK-757	2	Fail	Pass	Pass	Fail	Pass	Fail	Fail	Fail	Fail	Pass	Fail	Fail	Fail	Fail	Pass	Ixodes ricinus
DK	DK-757	3	Fail	Pass	Pass	Fail	Fail	Fail	Fail	Fail	Fail	Fail	Fail	Fail	Fail	Pass	Pass	Ixodes ricinus
DK	DK-757	4	Fail	Fail	Fail	Fail	Fail	Fail	Fail	Fail	Pass	Fail	Fail	Pass	Fail	Fail	Fail	Ixodes ricinus
DK	DK-757	5	Fail	Pass	Pass	Fail	Fail	Fail	Fail	Fail	Fail	Fail	Fail	Fail	Fail	Fail	Fail	Ixodes ricinus
DK	DK-757	6	Fail	Fail	Fail	Fail	Fail	Fail	Fail	Fail	Fail	Fail	Fail	Pass	Fail	Fail	Fail	Ixodes ricinus
DK	DK-757	7	Fail	Pass	Pass	Fail	Fail	Fail	Fail	Fail	Fail	Fail	Fail	Pass	Fail	Pass	Pass	Ixodes ricinus
DK	DK-757	8	Fail	Pass	Pass	Fail	Fail	Fail	Fail	Fail	Fail	Fail	Fail	Fail	Fail	Fail	Fail	Ixodes ricinus
DK	DK-757	9	Pass	Pass	Pass	Fail	Fail	Fail	Fail	Fail	Fail	Fail	Fail	Fail	Fail	Pass	Pass	Ixodes ricinus
DK	DK-757	10	Fail	Fail	Fail	Fail	Fail	Fail	Fail	Fail	Fail	Fail	Fail	Fail	Fail	Fail	Fail	Ixodes ricinus
DK	DK-757	11	Fail	Pass	Pass	Fail	Fail	Fail	Fail	Fail	Fail	Fail	Fail	Fail	Pass	Pass	Pass	Ixodes ricinus
DK	DK-757	12	Pass	Pass	Pass	Fail	Fail	Fail	Fail	Fail	Fail	Fail	Fail	Fail	Fail	Pass	Pass	Ixodes ricinus
DK	DK-757	13	Fail	Pass	Pass	Fail	Fail	Fail	Fail	Fail	Fail	Fail	Fail	Fail	Fail	Fail	Fail	Ixodes ricinus
DK	DK-757	14	Pass	Pass	Pass	Fail	Fail	Fail	Fail	Fail	Fail	Fail	Fail	Fail	Pass	Pass	Fail	Ixodes ricinus
DK	DK-757	15	Fail	Pass	Pass	Fail	Fail	Fail	Fail	Fail	Fail	Fail	Fail	Fail	Fail	Pass	Pass	Ixodes ricinus
DK	DK-757	16	Fail	Pass	Pass	Fail	Fail	Fail	Fail	Fail	Fail	Fail	Fail	Fail	Fail	Pass	Pass	Ixodes ricinus
DK	DK-757	17	Fail	Fail	Fail	Fail	Fail	Fail	Fail	Fail	Fail	Fail	Fail	Fail	Fail	Pass	Pass	Ixodes ricinus
DK	DK-757	18	Pass	Pass	Fail	Fail	Fail	Fail	Fail	Fail	Fail	Fail	Fail	Fail	Fail	Fail	Fail	Ixodes ricinus
DK	DK-757	19	Fail	Pass	Pass	Fail	Fail	Fail	Fail	Fail	Fail	Fail	Fail	Fail	Fail	Pass	Pass	Ixodes ricinus
DK	DK-757	20	Fail	Pass	Pass	Fail	Fail	Fail	Fail	Fail	Fail	Fail	Fail	Fail	Fail	Pass	Fail	Ixodes ricinus
DK	DK-757	21	Pass	Pass	Pass	Fail	Fail	Fail	Fail	Fail	Pass	Fail	Fail	Fail	Pass	Fail	Fail	Ixodes ricinus
DK	DK-757	22	Fail	Pass	Pass	Fail	Fail	Fail	Fail	Fail	Pass	Fail	Fail	Fail	Fail	Fail	Fail	Ixodes ricinus
DK	DK-757	23	Fail	Pass	Pass	Fail	Fail	Fail	Fail	Fail	Fail	Fail	Fail	Fail	Fail	Pass	Pass	Ixodes ricinus
DK	DK-757	24	Fail	Pass	Pass	Fail	Fail	Fail	Fail	Fail	Fail	Fail	Fail	Fail	Fail	Fail	Fail	Ixodes ricinus
DK	DK-757	25	Pass	Pass	Pass	Fail	Pass	Fail	Fail	Fail	Fail	Fail	Fail	Fail	Pass	Pass	Pass	Ixodes ricinus
DK	DK-757	26	Fail	Pass	Pass	Fail	Fail	Fail	Fail	Fail	Fail	Fail	Fail	Fail	Fail	Pass	Pass	Ixodes ricinus
DK	DK-757	27	Fail	Pass	Pass	Fail	Fail	Fail	Fail	Fail	Fail	Fail	Fail	Pass	Fail	Pass	Pass	Ixodes ricinus
DK	DK-757	28	Fail	Fail	Fail	Fail	Fail	Fail	Fail	Fail	Pass	Fail	Fail	Fail	Fail	Pass	Pass	Ixodes ricinus
DK	DK-757	29	Pass	Pass	Pass	Fail	Fail	Fail	Fail	Fail	Pass	Fail	Fail	Pass	Fail	Fail	Fail	Ixodes ricinus
DK	DK-757	30	Fail	Pass	Fail	Fail	Pass	Fail	Fail	Pass	Pass	Fail	Fail	Fail	Fail	Pass	Pass	Ixodes ricinus
DK	DK-757	31	Fail	Pass	Pass	Fail	Fail	Fail	Fail	Fail	Fail	Fail	Fail	Fail	Fail	Fail	Fail	Ixodes ricinus
DK	DK-757	32	Fail	Fail	Fail	Fail	Fail	Fail	Fail	Fail	Fail	Fail	Fail	Fail	Fail	Fail	Fail	Ixodes ricinus
DK	DK-757	33	Fail	Pass	Pass	Fail	Fail	Fail	Fail	Fail	Fail	Fail	Fail	Fail	Pass	Fail	Fail	Ixodes ricinus
DK	DK-757	34	Fail	Pass	Pass	Fail	Fail	Fail	Fail	Pass	Fail	Fail	Fail	Fail	Fail	Pass	Pass	Ixodes ricinus
DK	DK-757	35	Fail	Pass	Pass	Fail	Fail	Fail	Fail	Fail	Pass	Fail	Fail	Fail	Fail	Pass	Pass	Ixodes ricinus
DK	DK-757	36	Fail	Fail	Fail	Fail	Fail	Fail	Fail	Fail	Pass	Fail	Fail	Fail	Fail	Pass	Fail	Ixodes ricinus
DK	DK-757	37	Pass	Pass	Pass	Fail	Fail	Fail	Fail	Fail	Pass	Fail	Fail	Fail	Fail	Pass	Pass	Ixodes ricinus
DK	DK-757	38	Fail	Fail	Fail	Fail	Fail	Fail	Fail	Fail	Fail	Fail	Fail	Fail	Pass	Pass	Fail	Ixodes ricinus
DK	DK-757	39	Fail	Fail	Fail	Fail	Fail	Fail	Fail	Fail	Fail	Fail	Fail	Fail	Fail	Fail	Fail	Ixodes ricinus
DK	DK-757	40	Fail	Pass	Pass	Fail	Fail	Fail	Fail	Fail	Fail	Fail	Fail	Fail	Pass	Pass	Pass	Ixodes ricinus
DK	DK-757	41	Fail	Fail	Fail	Fail	Fail	Fail	Fail	Fail	Fail	Fail	Fail	Fail	Fail	Fail	Fail	Ixodes ricinus
DK	DK-757	42	Fail	Fail	Fail	Fail	Fail	Fail	Fail	Fail	Fail	Fail	Fail	Fail	Fail	Pass	Pass	Ixodes ricinus
DK	DK-757	43	Fail	Pass	Fail	Fail	Fail	Fail	Fail	Fail	Fail	Fail	Fail	Fail	Fail	Fail	Fail	Ixodes ricinus
DK	DK-757	44	Fail	Pass	Pass	Fail	Fail	Fail	Fail	Fail	Fail	Fail	Fail	Fail	Pass	Fail	Fail	Ixodes ricinus
DK	DK-757	45	Fail	Fail	Fail	Fail	Fail	Fail	Fail	Fail	Fail	Fail	Fail	Fail	Fail	Fail	Fail	Ixodes ricinus
DK	DK-757	46	Pass	Pass	Fail	Fail	Fail	Fail	Fail	Fail	Pass	Fail	Fail	Fail	Fail	Pass	Pass	Ixodes ricinus
DK	DK-757	47	Fail	Pass	Pass	Fail	Fail	Fail	Fail	Fail	Fail	Fail	Fail	Fail	Fail	Fail	Fail	Ixodes ricinus
DK	DK-757	48	Fail	Fail	Fail	Fail	Fail	Fail	Fail	Fail	Fail	Fail	Fail	Pass	Fail	Pass	Pass	Ixodes ricinus
DK	DK-757	49	Fail	Fail	Fail	Fail	Fail	Fail	Fail	Fail	Fail	Fail	Fail	Fail	Fail	Pass	Pass	Ixodes ricinus
DK	DK-757	50	Fail	Pass	Fail	Fail	Pass	Fail	Fail	Fail	Pass	Fail	Fail	Fail	Fail	Fail	Fail	Ixodes ricinus
DK	DK-757	51	Pass	Pass	Fail	Fail	Fail	Fail	Fail	Fail	Fail	Fail	Fail	Fail	Fail	Pass	Pass	Ixodes ricinus
DK	DK-757	52	Fail	Pass	Pass	Fail	Fail	Fail	Fail	Fail	Fail	Fail	Fail	Fail	Fail	Pass	Pass	Ixodes ricinus
DK	DK-757	53	Fail	Fail	Fail	Fail	Fail	Fail	Fail	Fail	Fail	Fail	Fail	Fail	Fail	Fail	Fail	Ixodes ricinus
DK	DK-757	54	Fail	Fail	Fail	Fail	Fail	Fail	Fail	Fail	Fail	Fail	Fail	Fail	Fail	Pass	Pass	Ixodes ricinus
DK	DK-757	55	Fail	Pass	Pass	Fail	Fail	Fail	Fail	Fail	Pass	Fail	Fail	Fail	Fail	Fail	Fail	Ixodes ricinus
DK	DK-757	56	Fail	Pass	Pass	Fail	Fail	Fail	Fail	Fail	Fail	Fail	Fail	Fail	Pass	Fail	Fail	Ixodes ricinus
DK	DK-757	57	Fail	Fail	Fail	Fail	Fail	Fail	Fail	Fail	Fail	Fail	Fail	Fail	Fail	Fail	Fail	Ixodes ricinus
DK	DK-757	58	Fail	Pass	Pass	Fail	Fail	Fail	Fail	Fail	Fail	Fail	Fail	Fail	Pass	Pass	Pass	Ixodes ricinus
DK	DK-757	59	Fail	Pass	Pass	Fail	Fail	Fail	Fail	Fail	Fail	Fail	Fail	Fail	Fail	Fail	Fail	Ixodes ricinus
DK	DK-757	60	Fail	Fail	Fail	Fail	Fail	Fail	Fail	Fail	Fail	Fail	Fail	Fail	Fail	Pass	Pass	Ixodes ricinus
DK	DK-840	1	Fail	Pass	Pass	Fail	Fail	Fail	Fail	Fail	Fail	Fail	Fail	Fail	Fail	Pass	Pass	Ixodes ricinus
DK	DK-840	2	Fail	Pass	Pass	Fail	Fail	Fail	Fail	Pass	Pass	Fail	Fail	Fail	Fail	Pass	Pass	Ixodes ricinus
DK	DK-840	3	Fail	Pass	Pass	Fail	Fail	Fail	Fail	Fail	Fail	Fail	Fail	Fail	Pass	Fail	Fail	Ixodes ricinus
DK	DK-840	4	Fail	Fail	Fail	Fail	Fail	Fail	Fail	Fail	Fail	Fail	Fail	Fail	Fail	Pass	Pass	Ixodes ricinus
DK	DK-840	5	Fail	Pass	Pass	Fail	Fail	Fail	Fail	Fail	Fail	Fail	Fail	Fail	Pass	Pass	Pass	Ixodes ricinus
DK	DK-840	6	Fail	Pass	Pass	Fail	Fail	Fail	Fail	Fail	Fail	Fail	Fail	Fail	Pass	Pass	Pass	Ixodes ricinus
DK	DK-840	7	Fail	Fail	Fail	Fail	Fail	Fail	Fail	Fail	Fail	Fail	Fail	Fail	Fail	Pass	Pass	Ixodes ricinus
DK	DK-840	8	Fail	Pass	Pass	Fail	Fail	Fail	Fail	Fail	Fail	Fail	Fail	Fail	Pass	Pass	Pass	Ixodes ricinus
DK	DK-840	9	Fail	Pass	Pass	Fail	Fail	Fail	Fail	Fail	Fail	Fail	Fail	Fail	Pass	Pass	Pass	Ixodes ricinus
DK	DK-840	10	Fail	Pass	Pass	Fail	Fail	Fail	Fail	Fail	Fail	Fail	Fail	Fail	Pass	Fail	Fail	Ixodes ricinus
DK	DK-840	11	Fail	Fail	Fail	Fail	Fail	Fail	Fail	Fail	Fail	Fail	Fail	Fail	Fail	Pass	Pass	Ixodes ricinus
DK	DK-840	12	Fail	Fail	Fail	Fail	Fail	Fail	Fail	Fail	Fail	Fail	Fail	Fail	Fail	Pass	Pass	Ixodes ricinus
DK	DK-840	13	Fail	Pass	Pass	Fail	Fail	Fail	Fail	Fail	Fail	Fail	Fail	Fail	Fail	Fail	Fail	Ixodes ricinus
DK	DK-840	14	Fail	Fail	Fail	Fail	Fail	Fail	Fail	Fail	Fail	Fail	Fail	Fail	Fail	Pass	Pass	Ixodes ricinus
DK	DK-840	15	Fail	Pass	Pass	Fail	Fail	Fail	Fail	Fail	Fail	Fail	Fail	Fail	Fail	Fail	Pass	Ixodes ricinus
DK	DK-840	16	Fail	Fail	Fail	Fail	Fail	Fail	Fail	Fail	Fail	Fail	Fail	Fail	Fail	Pass	Pass	Ixodes ricinus
DK	DK-840	17	Fail	Fail	Fail	Fail	Fail	Fail	Fail	Fail	Fail	Fail	Fail	Fail	Fail	Pass	Pass	Ixodes ricinus
DK	DK-840	18	Fail	Pass	Pass	Fail	Fail	Fail	Fail	Fail	Fail	Fail	Fail	Fail	Pass	Fail	Fail	Ixodes ricinus
DK	DK-840	19	Fail	Fail	Fail	Fail	Fail	Fail	Fail	Fail	Fail	Fail	Fail	Fail	Fail	Fail	Fail	Ixodes ricinus
DK	DK-840	20	Fail	Pass	Pass	Fail	Fail	Fail	Fail	Fail	Fail	Fail	Fail	Fail	Pass	Pass	Fail	Ixodes ricinus
DK	DK-840	21	Fail	Pass	Pass	Pass	Fail	Fail	Fail	Fail	Fail	Fail	Fail	Fail	Fail	Fail	Fail	Ixodes ricinus
DK	DK-840	22	Fail	Pass	Pass	Fail	Fail	Fail	Fail	Fail	Fail	Fail	Fail	Fail	Pass	Pass	Pass	Ixodes ricinus
DK	DK-840	23	Fail	Pass	Pass	Fail	Fail	Fail	Fail	Fail	Fail	Fail	Fail	Fail	Fail	Pass	Pass	Ixodes ricinus
DK	DK-840	24	Fail	Pass	Pass	Fail	Fail	Fail	Fail	Fail	Fail	Fail	Fail	Fail	Pass	Pass	Pass	Ixodes ricinus
DK	DK-840	25	Fail	Fail	Fail	Fail	Fail	Fail	Fail	Fail	Fail	Pass	Fail	Fail	Fail	Pass	Pass	Ixodes ricinus
DK	DK-840	26	Fail	Pass	Pass	Fail	Fail	Fail	Fail	Fail	Fail	Fail	Fail	Fail	Fail	Pass	Pass	Ixodes ricinus
DK	DK-840	27	Fail	Pass	Pass	Fail	Pass	Fail	Pass	Fail	Fail	Fail	Fail	Fail	Fail	Pass	Pass	Ixodes ricinus
DK	DK-840	28	Fail	Pass	Pass	Fail	Fail	Fail	Fail	Fail	Fail	Fail	Fail	Fail	Pass	Pass	Pass	Ixodes ricinus
DK	DK-840	29	Fail	Pass	Pass	Fail	Pass	Fail	Fail	Fail	Fail	Fail	Fail	Fail	Fail	Fail	Fail	Ixodes ricinus
DK	DK-840	30	Fail	Pass	Pass	Fail	Fail	Fail	Fail	Fail	Fail	Fail	Fail	Fail	Fail	Pass	Pass	Ixodes ricinus
DK	DK-840	31	Fail	Pass	Pass	Fail	Fail	Fail	Fail	Pass	Fail	Fail	Fail	Fail	Pass	Fail	Fail	Ixodes ricinus
DK	DK-840	32	Fail	Fail	Fail	Fail	Fail	Fail	Fail	Fail	Pass	Fail	Fail	Fail	Pass	Pass	Pass	Ixodes ricinus
DK	DK-840	33	Fail	Pass	Pass	Fail	Fail	Fail	Fail	Fail	Fail	Fail	Fail	Fail	Pass	Pass	Pass	Ixodes ricinus
DK	DK-840	34	Fail	Pass	Pass	Fail	Fail	Fail	Fail	Fail	Fail	Fail	Fail	Fail	Fail	Fail	Fail	Ixodes ricinus
DK	DK-840	35	Fail	Pass	Pass	Fail	Fail	Fail	Fail	Fail	Fail	Fail	Fail	Fail	Pass	Pass	Pass	Ixodes ricinus
DK	DK-840	36	Fail	Fail	Fail	Fail	Fail	Fail	Fail	Fail	Fail	Fail	Fail	Fail	Fail	Fail	Pass	Ixodes ricinus
DK	DK-840	37	Fail	Fail	Fail	Fail	Fail	Fail	Fail	Fail	Fail	Fail	Fail	Fail	Pass	Fail	Fail	Ixodes ricinus
DK	DK-840	38	Fail	Pass	Pass	Fail	Fail	Fail	Fail	Fail	Fail	Fail	Fail	Fail	Pass	Pass	Pass	Ixodes ricinus
DK	DK-840	39	Fail	Pass	Pass	Fail	Fail	Fail	Fail	Fail	Fail	Fail	Fail	Fail	Fail	Fail	Fail	Ixodes ricinus
DK	DK-840	40	Fail	Pass	Pass	Fail	Fail	Fail	Fail	Fail	Fail	Fail	Fail	Fail	Pass	Fail	Fail	Ixodes ricinus
DK	DK-840	41	Fail	Pass	Pass	Fail	Fail	Fail	Fail	Fail	Fail	Fail	Fail	Fail	Fail	Fail	Fail	Ixodes ricinus
DK	DK-840	42	Fail	Pass	Pass	Fail	Fail	Fail	Fail	Fail	Fail	Fail	Fail	Fail	Fail	Pass	Pass	Ixodes ricinus
DK	DK-840	43	Fail	Fail	Fail	Fail	Fail	Fail	Fail	Fail	Fail	Fail	Fail	Fail	Fail	Fail	Fail	Ixodes ricinus
DK	DK-840	44	Fail	Pass	Fail	Fail	Pass	Fail	Fail	Fail	Fail	Fail	Fail	Fail	Pass	Fail	Fail	Ixodes ricinus
DK	DK-840	45	Fail	Pass	Pass	Fail	Fail	Fail	Fail	Fail	Fail	Fail	Fail	Fail	Pass	Fail	Fail	Ixodes ricinus
DK	DK-840	46	Fail	Pass	Pass	Fail	Fail	Fail	Fail	Fail	Pass	Fail	Fail	Fail	Fail	Pass	Pass	Ixodes ricinus
DK	DK-840	47	Fail	Pass	Pass	Fail	Fail	Fail	Fail	Fail	Fail	Fail	Fail	Fail	Fail	Fail	Pass	Ixodes ricinus
DK	DK-840	48	Fail	Pass	Pass	Fail	Fail	Fail	Fail	Fail	Pass	Fail	Fail	Fail	Pass	Fail	Fail	Ixodes ricinus
DK	DK-840	49	Fail	Pass	Pass	Fail	Fail	Fail	Fail	Fail	Fail	Fail	Fail	Fail	Pass	Pass	Pass	Ixodes ricinus
DK	DK-840	50	Fail	Fail	Fail	Fail	Fail	Fail	Fail	Fail	Fail	Fail	Fail	Fail	Fail	Fail	Fail	Ixodes ricinus
DK	DK-840	51	Fail	Fail	Fail	Fail	Fail	Fail	Fail	Fail	Fail	Fail	Fail	Fail	Fail	Pass	Pass	Ixodes ricinus
DK	DK-840	52	Fail	Pass	Pass	Fail	Pass	Fail	Fail	Fail	Fail	Fail	Fail	Fail	Pass	Pass	Pass	Ixodes ricinus
DK	DK-840	53	Fail	Pass	Pass	Fail	Fail	Fail	Fail	Fail	Pass	Fail	Fail	Fail	Fail	Pass	Pass	Ixodes ricinus
DK	DK-840	54	Fail	Fail	Fail	Fail	Fail	Fail	Fail	Fail	Fail	Fail	Fail	Fail	Fail	Pass	Pass	Ixodes ricinus
DK	DK-840	55	Fail	Pass	Pass	Fail	Fail	Fail	Fail	Fail	Fail	Fail	Fail	Fail	Pass	Fail	Fail	Ixodes ricinus
DK	DK-840	56	Fail	Pass	Pass	Fail	Pass	Fail	Fail	Fail	Fail	Fail	Fail	Fail	Pass	Pass	Pass	Ixodes ricinus
DK	DK-840	57	Fail	Pass	Pass	Fail	Pass	Fail	Fail	Fail	Fail	Fail	Fail	Fail	Fail	Fail	Fail	Ixodes ricinus
DK	DK-840	58	Fail	Fail	Fail	Fail	Fail	Fail	Fail	Fail	Fail	Fail	Fail	Fail	Pass	Fail	Fail	Ixodes ricinus
DK	DK-840	59	Fail	Pass	Fail	Fail	Fail	Fail	Fail	Fail	Fail	Fail	Fail	Fail	Fail	Pass	Pass	Ixodes ricinus
DK	DK-840	60	Fail	Fail	Fail	Fail	Fail	Fail	Fail	Fail	Fail	Fail	Fail	Fail	Fail	Pass	Pass	Ixodes ricinus
NO	NO-123	1	Pass	Pass	Fail	Fail	Pass	Fail	Pass	Fail	Fail	Fail	Fail	Fail	Fail	Fail	Fail	Ixodes ricinus
NO	NO-123	2	Fail	Pass	Fail	Fail	Fail	Fail	Fail	Fail	Fail	Fail	Fail	Fail	Fail	Fail	Fail	Ixodes ricinus
NO	NO-123	3	Fail	Pass	Pass	Fail	Pass	Fail	Fail	Pass	Fail	Fail	Fail	Fail	Fail	Fail	Fail	Ixodes ricinus
NO	NO-123	4	Fail	Pass	Fail	Fail	Fail	Fail	Fail	Fail	Fail	Fail	Fail	Fail	Fail	Fail	Fail	Ixodes ricinus
NO	NO-123	5	Fail	Pass	Pass	Fail	Fail	Fail	Fail	Fail	Pass	Fail	Fail	Fail	Fail	Fail	Fail	Ixodes ricinus
NO	NO-123	6	Fail	Fail	Fail	Fail	Fail	Fail	Fail	Fail	Pass	Fail	Fail	Fail	Fail	Fail	Fail	Ixodes ricinus
NO	NO-123	7	Fail	Pass	Fail	Fail	Pass	Fail	Fail	Fail	Pass	Fail	Fail	Fail	Fail	Fail	Fail	Ixodes ricinus
NO	NO-123	8	Fail	Pass	Fail	Fail	Fail	Fail	Pass	Fail	Pass	Fail	Fail	Fail	Fail	Fail	Fail	Ixodes ricinus
NO	NO-123	9	Fail	Pass	Pass	Fail	Fail	Fail	Fail	Fail	Fail	Fail	Fail	Fail	Pass	Fail	Fail	Ixodes ricinus
NO	NO-123	10	Fail	Pass	Pass	Fail	Pass	Fail	Pass	Fail	Pass	Fail	Fail	Fail	Fail	Fail	Fail	Ixodes ricinus
NO	NO-123	11	Fail	Fail	Fail	Fail	Fail	Fail	Fail	Fail	Fail	Fail	Fail	Fail	Pass	Fail	Fail	Ixodes ricinus
NO	NO-123	12	Fail	Fail	Fail	Fail	Fail	Fail	Fail	Fail	Pass	Fail	Fail	Fail	Fail	Fail	Fail	Ixodes ricinus
NO	NO-123	13	Fail	Pass	Pass	Pass	Fail	Fail	Fail	Fail	Fail	Fail	Fail	Fail	Fail	Fail	Fail	Ixodes ricinus
NO	NO-123	14	Fail	Pass	Pass	Fail	Pass	Fail	Pass	Fail	Fail	Fail	Fail	Fail	Fail	Fail	Fail	Ixodes ricinus
NO	NO-123	15	Fail	Pass	Pass	Fail	Fail	Fail	Fail	Fail	Fail	Fail	Fail	Fail	Fail	Fail	Fail	Ixodes ricinus
NO	NO-123	16	Fail	Pass	Pass	Fail	Fail	Fail	Fail	Fail	Pass	Fail	Fail	Fail	Fail	Fail	Fail	Ixodes ricinus
NO	NO-123	17	Fail	Pass	Pass	Fail	Fail	Fail	Fail	Fail	Fail	Fail	Fail	Fail	Pass	Fail	Fail	Ixodes ricinus
NO	NO-123	18	Fail	Fail	Fail	Fail	Fail	Fail	Fail	Fail	Fail	Fail	Fail	Fail	Fail	Fail	Fail	Ixodes ricinus
NO	NO-123	19	Fail	Pass	Pass	Fail	Fail	Fail	Fail	Fail	Fail	Fail	Fail	Fail	Pass	Fail	Fail	Ixodes ricinus
NO	NO-123	20	Fail	Fail	Fail	Fail	Fail	Fail	Fail	Fail	Fail	Fail	Fail	Fail	Fail	Fail	Fail	Ixodes ricinus
NO	NO-123	21	Fail	Pass	Pass	Fail	Pass	Fail	Fail	Fail	Fail	Fail	Fail	Fail	Fail	Fail	Fail	Ixodes ricinus
NO	NO-123	22	Fail	Pass	Pass	Fail	Fail	Fail	Fail	Fail	Fail	Fail	Fail	Fail	Pass	Fail	Fail	Ixodes ricinus
NO	NO-123	23	Fail	Fail	Fail	Fail	Fail	Fail	Fail	Fail	Fail	Fail	Fail	Fail	Pass	Fail	Fail	Ixodes ricinus
NO	NO-123	24	Fail	Pass	Pass	Fail	Fail	Fail	Fail	Fail	Pass	Fail	Fail	Fail	Fail	Fail	Fail	Ixodes ricinus
NO	NO-123	25	Pass	Pass	Fail	Fail	Pass	Fail	Fail	Fail	Fail	Fail	Fail	Fail	Fail	Fail	Fail	Ixodes ricinus
NO	NO-123	26	Fail	Fail	Pass	Fail	Fail	Fail	Fail	Fail	Fail	Fail	Fail	Fail	Fail	Fail	Fail	Ixodes ricinus
NO	NO-123	27	Fail	Pass	Pass	Fail	Fail	Fail	Fail	Fail	Pass	Fail	Fail	Fail	Fail	Fail	Fail	Ixodes ricinus
NO	NO-123	28	Fail	Pass	Fail	Fail	Fail	Fail	Fail	Fail	Fail	Fail	Fail	Fail	Fail	Fail	Fail	Ixodes ricinus
NO	NO-123	29	Fail	Pass	Fail	Fail	Fail	Fail	Fail	Fail	Pass	Fail	Fail	Fail	Fail	Fail	Fail	Ixodes ricinus
NO	NO-123	30	Fail	Pass	Fail	Pass	Fail	Fail	Fail	Fail	Pass	Fail	Fail	Fail	Fail	Fail	Fail	Ixodes ricinus
NO	NO-123	31	Fail	Pass	Pass	Fail	Pass	Fail	Pass	Fail	Fail	Fail	Fail	Fail	Fail	Pass	Pass	Ixodes ricinus
NO	NO-123	32	Pass	Pass	Pass	Fail	Fail	Fail	Fail	Pass	Pass	Fail	Fail	Fail	Fail	Fail	Fail	Ixodes ricinus
NO	NO-123	33	Fail	Pass	Pass	Fail	Fail	Fail	Fail	Pass	Pass	Fail	Fail	Fail	Fail	Fail	Fail	Ixodes ricinus
NO	NO-123	34	Fail	Fail	Fail	Fail	Fail	Fail	Fail	Fail	Pass	Fail	Fail	Fail	Pass	Fail	Fail	Ixodes ricinus
NO	NO-123	35	Fail	Fail	Pass	Fail	Fail	Fail	Fail	Fail	Pass	Fail	Fail	Fail	Fail	Fail	Fail	Ixodes ricinus
NO	NO-123	36	Fail	Pass	Pass	Fail	Fail	Fail	Fail	Fail	Fail	Fail	Fail	Fail	Fail	Pass	Fail	Ixodes ricinus
NO	NO-123	37	Fail	Pass	Fail	Fail	Pass	Fail	Fail	Fail	Fail	Fail	Fail	Fail	Fail	Fail	Fail	Ixodes ricinus
NO	NO-123	38	Fail	Pass	Pass	Fail	Fail	Fail	Fail	Fail	Fail	Fail	Fail	Fail	Fail	Fail	Fail	Ixodes ricinus
NO	NO-123	39	Fail	Pass	Pass	Fail	Fail	Fail	Fail	Fail	Fail	Fail	Fail	Fail	Fail	Fail	Fail	Ixodes ricinus
NO	NO-123	40	Fail	Pass	Pass	Fail	Pass	Fail	Fail	Fail	Fail	Fail	Fail	Fail	Fail	Fail	Fail	Ixodes ricinus
NO	NO-123	41	Fail	Pass	Pass	Fail	Pass	Fail	Pass	Fail	Fail	Fail	Fail	Fail	Fail	Fail	Fail	Ixodes ricinus
NO	NO-123	42	Fail	Pass	Fail	Fail	Pass	Fail	Fail	Pass	Fail	Fail	Fail	Fail	Pass	Fail	Fail	Ixodes ricinus
NO	NO-123	43	Fail	Pass	Pass	Fail	Fail	Fail	Fail	Fail	Fail	Fail	Fail	Fail	Pass	Fail	Fail	Ixodes ricinus
NO	NO-123	44	Fail	Pass	Pass	Fail	Pass	Fail	Pass	Fail	Fail	Fail	Fail	Fail	Fail	Fail	Fail	Ixodes ricinus
NO	NO-123	45	Fail	Pass	Fail	Fail	Pass	Fail	Pass	Fail	Fail	Fail	Fail	Fail	Fail	Fail	Fail	Ixodes ricinus
NO	NO-123	46	Fail	Fail	Fail	Fail	Fail	Fail	Fail	Fail	Fail	Fail	Fail	Fail	Pass	Fail	Fail	Ixodes ricinus
NO	NO-123	47	Fail	Fail	Fail	Fail	Fail	Fail	Fail	Fail	Fail	Fail	Fail	Fail	Fail	Fail	Fail	Ixodes ricinus
NO	NO-123	48	Fail	Pass	Pass	Fail	Fail	Fail	Fail	Fail	Pass	Fail	Fail	Fail	Pass	Fail	Fail	Ixodes ricinus
NO	NO-123	49	Fail	Pass	Pass	Fail	Pass	Fail	Fail	Fail	Fail	Fail	Fail	Fail	Fail	Fail	Fail	Ixodes ricinus
NO	NO-123	50	Fail	Pass	Pass	Fail	Fail	Fail	Fail	Fail	Fail	Fail	Fail	Fail	Pass	Fail	Fail	Ixodes ricinus
NO	NO-123	51	Fail	Pass	Fail	Fail	Pass	Fail	Fail	Pass	Pass	Fail	Fail	Fail	Fail	Fail	Fail	Ixodes ricinus
NO	NO-123	52	Fail	Pass	Pass	Fail	Fail	Fail	Fail	Pass	Fail	Fail	Fail	Fail	Fail	Fail	Fail	Ixodes ricinus
NO	NO-123	53	Fail	Pass	Pass	Fail	Pass	Fail	Pass	Fail	Fail	Fail	Fail	Fail	Pass	Fail	Fail	Ixodes ricinus
NO	NO-123	54	Fail	Fail	Fail	Fail	Fail	Fail	Fail	Fail	Pass	Fail	Fail	Fail	Fail	Fail	Fail	Ixodes ricinus
NO	NO-123	55	Fail	Pass	Pass	Fail	Pass	Fail	Fail	Pass	Pass	Fail	Fail	Fail	Pass	Fail	Fail	Ixodes ricinus
NO	NO-123	56	Fail	Fail	Fail	Fail	Fail	Fail	Fail	Fail	Fail	Fail	Fail	Fail	Fail	Fail	Fail	Ixodes ricinus
NO	NO-123	57	Fail	Pass	Pass	Fail	Pass	Fail	Fail	Fail	Fail	Fail	Fail	Fail	Fail	Fail	Fail	Ixodes ricinus
NO	NO-123	58	Fail	Fail	Fail	Fail	Fail	Fail	Fail	Fail	Fail	Fail	Fail	Fail	Fail	Pass	Pass	Ixodes ricinus
NO	NO-123	59	Fail	Pass	Pass	Fail	Fail	Fail	Fail	Fail	Fail	Fail	Fail	Fail	Fail	Pass	Pass	Ixodes ricinus
NO	NO-123	60	Fail	Pass	Pass	Fail	Pass	Fail	Fail	Fail	Fail	Fail	Fail	Fail	Fail	Fail	Fail	Ixodes ricinus
NO	NO-124	1	Fail	Fail	Fail	Fail	Fail	Fail	Fail	Fail	Fail	Fail	Fail	Fail	Fail	Fail	Fail	Ixodes ricinus
NO	NO-124	2	Fail	Pass	Fail	Fail	Pass	Fail	Pass	Pass	Fail	Fail	Fail	Fail	Fail	Fail	Fail	Ixodes ricinus
NO	NO-124	3	Fail	Pass	Fail	Fail	Pass	Fail	Pass	Fail	Pass	Fail	Fail	Fail	Fail	Fail	Fail	Ixodes ricinus
NO	NO-124	4	Fail	Pass	Fail	Fail	Pass	Fail	Fail	Pass	Fail	Fail	Fail	Fail	Fail	Fail	Fail	Ixodes ricinus
NO	NO-124	5	Fail	Pass	Fail	Fail	Pass	Fail	Fail	Fail	Fail	Fail	Fail	Fail	Fail	Fail	Fail	Ixodes ricinus
NO	NO-124	6	Fail	Pass	Fail	Fail	Pass	Fail	Fail	Fail	Fail	Fail	Fail	Fail	Fail	Fail	Fail	Ixodes ricinus
NO	NO-124	7	Fail	Pass	Fail	Fail	Pass	Fail	Fail	Pass	Pass	Fail	Fail	Fail	Fail	Fail	Fail	Ixodes ricinus
NO	NO-124	8	Fail	Fail	Fail	Fail	Fail	Fail	Fail	Fail	Fail	Fail	Fail	Fail	Fail	Fail	Fail	Ixodes ricinus
NO	NO-124	9	Fail	Pass	Pass	Fail	Fail	Fail	Fail	Fail	Pass	Fail	Fail	Fail	Pass	Fail	Fail	Ixodes ricinus
NO	NO-124	10	Fail	Fail	Fail	Fail	Fail	Fail	Fail	Fail	Pass	Fail	Fail	Fail	Fail	Fail	Fail	Ixodes ricinus
NO	NO-124	11	Fail	Pass	Pass	Fail	Fail	Fail	Fail	Pass	Pass	Fail	Fail	Fail	Fail	Fail	Fail	Ixodes ricinus
NO	NO-124	12	Fail	Fail	Fail	Fail	Fail	Fail	Fail	Fail	Fail	Fail	Fail	Fail	Fail	Pass	Pass	Ixodes ricinus
NO	NO-124	13	Fail	Pass	Pass	Fail	Fail	Fail	Fail	Fail	Fail	Fail	Fail	Fail	Fail	Pass	Pass	Ixodes ricinus
NO	NO-124	14	Fail	Pass	Pass	Fail	Fail	Fail	Fail	Fail	Fail	Fail	Fail	Fail	Fail	Fail	Fail	Ixodes ricinus
NO	NO-124	15	Fail	Pass	Pass	Fail	Fail	Fail	Fail	Pass	Fail	Fail	Fail	Fail	Fail	Fail	Fail	Ixodes ricinus
NO	NO-124	16	Fail	Fail	Fail	Fail	Fail	Fail	Fail	Fail	Fail	Fail	Fail	Fail	Fail	Fail	Fail	Ixodes ricinus
NO	NO-124	17	Fail	Fail	Pass	Fail	Fail	Fail	Fail	Fail	Pass	Fail	Fail	Fail	Pass	Pass	Fail	Ixodes ricinus
NO	NO-124	18	Fail	Pass	Fail	Fail	Fail	Fail	Fail	Fail	Fail	Fail	Fail	Fail	Fail	Fail	Fail	Ixodes ricinus
NO	NO-124	19	Fail	Pass	Pass	Fail	Fail	Fail	Fail	Pass	Fail	Fail	Fail	Fail	Fail	Fail	Fail	Ixodes ricinus
NO	NO-124	20	Fail	Fail	Fail	Fail	Fail	Fail	Fail	Fail	Pass	Fail	Fail	Fail	Fail	Fail	Fail	Ixodes ricinus
NO	NO-124	21	Fail	Pass	Fail	Fail	Pass	Fail	Fail	Pass	Fail	Fail	Fail	Fail	Fail	Fail	Fail	Ixodes ricinus
NO	NO-124	22	Fail	Pass	Fail	Fail	Fail	Fail	Fail	Pass	Pass	Fail	Fail	Fail	Fail	Fail	Fail	Ixodes ricinus
NO	NO-124	23	Fail	Pass	Pass	Fail	Pass	Fail	Fail	Fail	Pass	Fail	Fail	Fail	Fail	Fail	Fail	Ixodes ricinus
NO	NO-124	24	Fail	Fail	Fail	Fail	Fail	Fail	Fail	Fail	Pass	Fail	Fail	Fail	Fail	Fail	Fail	Ixodes ricinus
NO	NO-124	25	Fail	Fail	Fail	Fail	Fail	Fail	Fail	Fail	Fail	Fail	Fail	Fail	Fail	Fail	Fail	Ixodes ricinus
NO	NO-124	26	Fail	Pass	Pass	Fail	Fail	Fail	Fail	Fail	Fail	Fail	Fail	Fail	Fail	Fail	Fail	Ixodes ricinus
NO	NO-124	27	Fail	Pass	Fail	Fail	Pass	Fail	Fail	Fail	Fail	Fail	Fail	Fail	Fail	Fail	Fail	Ixodes ricinus
NO	NO-124	28	Fail	Fail	Fail	Fail	Fail	Fail	Fail	Fail	Fail	Fail	Fail	Fail	Fail	Fail	Fail	Ixodes ricinus
NO	NO-124	29	Fail	Pass	Pass	Fail	Fail	Fail	Fail	Fail	Fail	Fail	Fail	Fail	Fail	Fail	Fail	Ixodes ricinus
NO	NO-124	30	Fail	Pass	Fail	Pass	Pass	Fail	Pass	Fail	Fail	Fail	Fail	Fail	Fail	Fail	Fail	Ixodes ricinus
NO	NO-124	31	Fail	Pass	Pass	Pass	Fail	Fail	Fail	Fail	Fail	Fail	Fail	Fail	Pass	Fail	Fail	Ixodes ricinus
NO	NO-124	32	Fail	Fail	Fail	Fail	Fail	Fail	Fail	Fail	Fail	Fail	Fail	Fail	Pass	Fail	Fail	Ixodes ricinus
NO	NO-124	33	Fail	Pass	Fail	Pass	Fail	Fail	Fail	Fail	Pass	Fail	Fail	Fail	Fail	Fail	Fail	Ixodes ricinus
NO	NO-124	34	Fail	Fail	Fail	Fail	Fail	Fail	Fail	Fail	Pass	Fail	Fail	Fail	Fail	Pass	Pass	Ixodes ricinus
NO	NO-124	35	Fail	Pass	Pass	Fail	Fail	Fail	Fail	Fail	Fail	Fail	Fail	Fail	Fail	Pass	Pass	Ixodes ricinus
NO	NO-124	36	Fail	Pass	Fail	Pass	Pass	Fail	Pass	Fail	Fail	Fail	Fail	Fail	Fail	Fail	Fail	Ixodes ricinus
NO	NO-124	37	Pass	Pass	Fail	Fail	Fail	Fail	Fail	Fail	Fail	Fail	Fail	Fail	Pass	Fail	Fail	Ixodes ricinus
NO	NO-124	38	Fail	Pass	Pass	Fail	Pass	Fail	Fail	Fail	Pass	Fail	Fail	Fail	Fail	Fail	Fail	Ixodes ricinus
NO	NO-124	39	Fail	Fail	Fail	Fail	Fail	Fail	Fail	Fail	Fail	Fail	Fail	Fail	Fail	Fail	Fail	Ixodes ricinus
NO	NO-124	40	Fail	Pass	Pass	Fail	Pass	Fail	Pass	Fail	Fail	Pass	Fail	Fail	Fail	Fail	Fail	Ixodes ricinus
NO	NO-124	41	Fail	Pass	Fail	Fail	Fail	Fail	Fail	Pass	Pass	Fail	Fail	Fail	Fail	Fail	Fail	Ixodes ricinus
NO	NO-124	42	Fail	Pass	Pass	Fail	Fail	Fail	Fail	Fail	Pass	Fail	Fail	Fail	Fail	Fail	Fail	Ixodes ricinus
NO	NO-124	43	Fail	Pass	Pass	Fail	Fail	Fail	Fail	Fail	Fail	Fail	Fail	Fail	Pass	Fail	Fail	Ixodes ricinus
NO	NO-124	44	Fail	Pass	Fail	Fail	Fail	Fail	Fail	Pass	Pass	Fail	Fail	Fail	Pass	Fail	Fail	Ixodes ricinus
NO	NO-124	45	Pass	Pass	Fail	Fail	Fail	Fail	Fail	Fail	Fail	Fail	Fail	Fail	Fail	Fail	Fail	Ixodes ricinus
NO	NO-124	46	Fail	Pass	Pass	Fail	Fail	Fail	Fail	Fail	Fail	Fail	Fail	Fail	Fail	Fail	Fail	Ixodes ricinus
NO	NO-124	47	Fail	Pass	Pass	Fail	Fail	Fail	Fail	Pass	Fail	Pass	Fail	Fail	Pass	Fail	Fail	Ixodes ricinus
NO	NO-124	48	Fail	Pass	Pass	Fail	Pass	Fail	Fail	Pass	Fail	Fail	Fail	Fail	Pass	Fail	Fail	Ixodes ricinus
NO	NO-124	49	Pass	Pass	Pass	Fail	Fail	Fail	Fail	Fail	Fail	Fail	Fail	Fail	Fail	Fail	Fail	Ixodes ricinus
NO	NO-124	50	Fail	Pass	Fail	Pass	Fail	Fail	Fail	Pass	Pass	Fail	Fail	Fail	Fail	Fail	Fail	Ixodes ricinus
NO	NO-124	51	Fail	Fail	Fail	Fail	Fail	Fail	Fail	Fail	Fail	Fail	Fail	Fail	Fail	Fail	Fail	Ixodes ricinus
NO	NO-124	52	Fail	Pass	Fail	Fail	Fail	Fail	Fail	Fail	Pass	Fail	Fail	Fail	Pass	Fail	Fail	Ixodes ricinus
NO	NO-124	53	Fail	Fail	Fail	Fail	Fail	Fail	Fail	Fail	Fail	Fail	Fail	Fail	Fail	Fail	Fail	Ixodes ricinus
NO	NO-124	54	Fail	Pass	Pass	Fail	Fail	Fail	Fail	Fail	Fail	Fail	Fail	Fail	Fail	Fail	Fail	Ixodes ricinus
NO	NO-124	55	Fail	Fail	Fail	Fail	Fail	Fail	Fail	Fail	Fail	Pass	Fail	Fail	Fail	Fail	Fail	Ixodes ricinus
NO	NO-124	56	Fail	Pass	Pass	Fail	Pass	Fail	Fail	Pass	Fail	Fail	Fail	Fail	Fail	Fail	Fail	Ixodes ricinus
NO	NO-124	57	Pass	Pass	Pass	Pass	Fail	Fail	Fail	Fail	Fail	Fail	Fail	Fail	Fail	Fail	Fail	Ixodes ricinus
NO	NO-124	58	Fail	Fail	Fail	Fail	Fail	Fail	Fail	Fail	Pass	Fail	Fail	Fail	Fail	Fail	Fail	Ixodes ricinus
NO	NO-124	59	Fail	Fail	Fail	Fail	Fail	Fail	Fail	Fail	Pass	Fail	Fail	Fail	Fail	Fail	Fail	Ixodes ricinus
NO	NO-124	60	Fail	Pass	Pass	Fail	Fail	Fail	Fail	Fail	Fail	Fail	Fail	Fail	Pass	Fail	Fail	Ixodes ricinus
NO	O-111	1	Fail	Fail	Fail	Fail	Fail	Fail	Fail	Fail	Fail	Fail	Fail	Fail	Pass	Pass	Pass	Ixodes ricinus
NO	O-111	2	Fail	Pass	Pass	Fail	Fail	Fail	Fail	Pass	Pass	Fail	Fail	Fail	Pass	Fail	Fail	Ixodes ricinus
NO	O-111	3	Fail	Fail	Fail	Fail	Fail	Fail	Fail	Fail	Fail	Fail	Fail	Fail	Fail	Pass	Pass	Ixodes ricinus
NO	O-111	4	Fail	Pass	Pass	Fail	Fail	Fail	Fail	Fail	Fail	Fail	Fail	Fail	Fail	Pass	Pass	Ixodes ricinus
NO	O-111	5	Fail	Fail	Fail	Fail	Fail	Fail	Fail	Fail	Fail	Fail	Fail	Fail	Fail	Pass	Pass	Ixodes ricinus
NO	O-111	6	Fail	Pass	Pass	Fail	Fail	Fail	Fail	Fail	Fail	Fail	Fail	Fail	Fail	Fail	Fail	Ixodes ricinus
NO	O-111	7	Fail	Fail	Fail	Fail	Fail	Fail	Fail	Fail	Fail	Fail	Fail	Fail	Fail	Pass	Pass	Ixodes ricinus
NO	O-111	8	Fail	Pass	Pass	Fail	Fail	Fail	Fail	Pass	Fail	Fail	Fail	Fail	Fail	Fail	Fail	Ixodes ricinus
NO	O-111	9	Fail	Pass	Fail	Fail	Pass	Fail	Pass	Pass	Fail	Fail	Fail	Fail	Fail	Pass	Pass	Ixodes ricinus
NO	O-111	10	Fail	Fail	Fail	Fail	Fail	Fail	Fail	Fail	Fail	Fail	Fail	Fail	Pass	Pass	Pass	Ixodes ricinus
NO	O-111	11	Fail	Pass	Pass	Fail	Fail	Fail	Pass	Fail	Fail	Fail	Fail	Fail	Pass	Pass	Pass	Ixodes ricinus
NO	O-111	12	Fail	Pass	Pass	Fail	Fail	Fail	Fail	Fail	Fail	Fail	Fail	Fail	Fail	Pass	Pass	Ixodes ricinus
NO	O-111	13	Fail	Pass	Pass	Fail	Pass	Fail	Fail	Fail	Fail	Fail	Fail	Fail	Pass	Fail	Fail	Ixodes ricinus
NO	O-111	14	Fail	Pass	Fail	Fail	Pass	Fail	Pass	Pass	Fail	Fail	Fail	Fail	Fail	Fail	Fail	Ixodes ricinus
NO	O-111	15	Pass	Pass	Pass	Fail	Fail	Fail	Fail	Fail	Pass	Fail	Fail	Fail	Pass	Fail	Fail	Ixodes ricinus
NO	O-111	16	Fail	Fail	Fail	Fail	Fail	Fail	Fail	Fail	Fail	Fail	Fail	Fail	Fail	Pass	Pass	Ixodes ricinus
NO	O-111	17	Fail	Pass	Pass	Fail	Fail	Fail	Fail	Fail	Fail	Fail	Fail	Fail	Pass	Pass	Pass	Ixodes ricinus
NO	O-111	18	Fail	Pass	Pass	Fail	Fail	Fail	Fail	Fail	Fail	Fail	Fail	Fail	Pass	Pass	Pass	Ixodes ricinus
NO	O-111	19	Fail	Pass	Fail	Fail	Pass	Fail	Pass	Fail	Fail	Fail	Fail	Fail	Fail	Pass	Pass	Ixodes ricinus
NO	O-111	20	Fail	Pass	Pass	Fail	Fail	Fail	Fail	Fail	Fail	Fail	Fail	Fail	Pass	Fail	Fail	Ixodes ricinus
NO	O-111	21	Fail	Pass	Fail	Pass	Fail	Fail	Fail	Fail	Fail	Fail	Fail	Fail	Fail	Pass	Pass	Ixodes ricinus
NO	O-111	22	Fail	Pass	Fail	Fail	Pass	Fail	Fail	Pass	Fail	Fail	Fail	Fail	Pass	Fail	Fail	Ixodes ricinus
NO	O-111	23	Fail	Pass	Pass	Fail	Fail	Fail	Fail	Fail	Fail	Fail	Fail	Fail	Fail	Fail	Fail	Ixodes ricinus
NO	O-111	24	Fail	Pass	Pass	Fail	Fail	Fail	Fail	Fail	Fail	Fail	Fail	Fail	Fail	Pass	Pass	Ixodes ricinus
NO	O-111	25	Fail	Pass	Pass	Pass	Fail	Fail	Fail	Fail	Fail	Fail	Fail	Fail	Fail	Fail	Fail	Ixodes ricinus
NO	O-111	26	Fail	Pass	Fail	Pass	Fail	Fail	Fail	Fail	Fail	Fail	Fail	Fail	Pass	Fail	Fail	Ixodes ricinus
NO	O-111	27	Fail	Pass	Pass	Pass	Fail	Fail	Fail	Pass	Fail	Fail	Fail	Pass	Pass	Fail	Fail	Ixodes ricinus
NO	O-111	28	Fail	Pass	Pass	Fail	Pass	Fail	Pass	Fail	Fail	Fail	Fail	Fail	Fail	Fail	Fail	Ixodes ricinus
NO	O-111	29	Fail	Pass	Pass	Fail	Fail	Fail	Fail	Fail	Fail	Fail	Fail	Fail	Pass	Fail	Fail	Ixodes ricinus
NO	O-111	30	Fail	Pass	Pass	Fail	Pass	Fail	Pass	Fail	Fail	Pass	Fail	Fail	Pass	Fail	Fail	Ixodes ricinus
NO	O-111	31	Pass	Pass	Pass	Fail	Fail	Fail	Pass	Fail	Fail	Fail	Fail	Fail	Fail	Pass	Pass	Ixodes ricinus
NO	O-111	32	Fail	Pass	Pass	Fail	Pass	Fail	Pass	Fail	Fail	Fail	Fail	Fail	Fail	Fail	Fail	Ixodes ricinus
NO	O-111	33	Fail	Pass	Pass	Fail	Pass	Fail	Fail	Fail	Pass	Fail	Fail	Fail	Fail	Fail	Fail	Ixodes ricinus
NO	O-111	34	Fail	Pass	Pass	Fail	Fail	Fail	Fail	Fail	Fail	Fail	Fail	Fail	Pass	Fail	Fail	Ixodes ricinus
NO	O-111	35	Fail	Pass	Pass	Fail	Fail	Fail	Fail	Fail	Fail	Fail	Fail	Fail	Pass	Fail	Fail	Ixodes ricinus
NO	O-111	36	Fail	Pass	Pass	Fail	Fail	Fail	Fail	Fail	Fail	Fail	Fail	Fail	Fail	Fail	Fail	Ixodes ricinus
NO	O-111	37	Fail	Pass	Pass	Fail	Fail	Fail	Fail	Fail	Fail	Fail	Fail	Fail	Fail	Fail	Fail	Ixodes ricinus
NO	O-111	38	Fail	Pass	Pass	Fail	Fail	Fail	Fail	Fail	Fail	Fail	Fail	Fail	Pass	Pass	Pass	Ixodes ricinus
NO	O-111	39	Fail	Pass	Fail	Fail	Pass	Fail	Pass	Pass	Fail	Pass	Fail	Fail	Fail	Fail	Fail	Ixodes ricinus
NO	O-111	40	Fail	Pass	Pass	Fail	Pass	Fail	Fail	Fail	Fail	Fail	Fail	Fail	Fail	Fail	Fail	Ixodes ricinus
NO	O-111	41	Fail	Pass	Pass	Fail	Fail	Fail	Fail	Pass	Pass	Fail	Fail	Fail	Fail	Pass	Pass	Ixodes ricinus
NO	O-111	42	Fail	Pass	Pass	Fail	Fail	Fail	Fail	Fail	Pass	Fail	Fail	Fail	Fail	Fail	Fail	Ixodes ricinus
NO	O-111	43	Fail	Pass	Pass	Fail	Fail	Fail	Fail	Fail	Fail	Fail	Fail	Pass	Fail	Fail	Fail	Ixodes ricinus
NO	O-111	44	Fail	Pass	Pass	Fail	Fail	Fail	Fail	Fail	Fail	Fail	Fail	Fail	Fail	Fail	Fail	Ixodes ricinus
NO	O-111	45	Fail	Pass	Pass	Fail	Pass	Fail	Pass	Fail	Fail	Pass	Fail	Fail	Pass	Pass	Pass	Ixodes ricinus
NO	O-111	46	Fail	Fail	Fail	Fail	Fail	Fail	Fail	Fail	Pass	Fail	Fail	Fail	Fail	Pass	Pass	Ixodes ricinus
NO	O-111	47	Pass	Pass	Fail	Fail	Fail	Fail	Fail	Fail	Fail	Fail	Fail	Fail	Pass	Pass	Pass	Ixodes ricinus
NO	O-111	48	Fail	Pass	Fail	Fail	Fail	Fail	Fail	Fail	Pass	Fail	Fail	Fail	Pass	Fail	Fail	Ixodes ricinus
NO	O-111	49	Fail	Pass	Pass	Fail	Fail	Fail	Fail	Pass	Fail	Fail	Fail	Fail	Fail	Pass	Pass	Ixodes ricinus
NO	O-111	50	Fail	Pass	Fail	Pass	Fail	Fail	Fail	Fail	Fail	Fail	Fail	Fail	Fail	Fail	Fail	Ixodes ricinus
NO	O-111	51	Fail	Pass	Pass	Fail	Fail	Fail	Fail	Fail	Fail	Fail	Fail	Fail	Pass	Fail	Fail	Ixodes ricinus
NO	O-111	52	Fail	Fail	Fail	Fail	Fail	Fail	Fail	Fail	Fail	Fail	Fail	Fail	Pass	Fail	Fail	Ixodes ricinus
NO	O-111	53	Fail	Pass	Pass	Fail	Pass	Fail	Fail	Pass	Fail	Fail	Fail	Fail	Fail	Fail	Fail	Ixodes ricinus
NO	O-111	54	Fail	Pass	Pass	Fail	Fail	Fail	Fail	Fail	Fail	Fail	Fail	Fail	Fail	Pass	Pass	Ixodes ricinus
NO	O-111	55	Fail	Pass	Pass	Fail	Fail	Fail	Fail	Fail	Fail	Fail	Fail	Fail	Pass	Fail	Fail	Ixodes ricinus
NO	O-111	56	Fail	Pass	Pass	Pass	Pass	Fail	Pass	Fail	Fail	Fail	Fail	Fail	Fail	Fail	Fail	Ixodes ricinus
NO	O-111	57	Fail	Fail	Fail	Fail	Fail	Fail	Fail	Fail	Fail	Fail	Fail	Fail	Fail	Pass	Pass	Ixodes ricinus
NO	O-111	58	Fail	Pass	Pass	Fail	Pass	Fail	Pass	Fail	Fail	Pass	Fail	Fail	Fail	Fail	Fail	Ixodes ricinus
NO	O-111	59	Fail	Pass	Pass	Fail	Fail	Fail	Fail	Fail	Fail	Fail	Fail	Fail	Pass	Pass	Pass	Ixodes ricinus
NO	O-111	60	Fail	Pass	Pass	Fail	Fail	Fail	Fail	Fail	Fail	Fail	Fail	Fail	Fail	Fail	Fail	Ixodes ricinus
NO	O-119	1	Fail	Pass	Pass	Fail	Pass	Fail	Pass	Pass	Fail	Fail	Fail	Fail	Fail	Fail	Fail	Ixodes ricinus
NO	O-119	2	Fail	Fail	Fail	Fail	Fail	Fail	Fail	Fail	Fail	Fail	Fail	Fail	Fail	Fail	Pass	Ixodes ricinus
NO	O-119	3	Fail	Pass	Fail	Pass	Fail	Fail	Fail	Fail	Fail	Fail	Fail	Fail	Pass	Fail	Fail	Ixodes ricinus
NO	O-119	4	Fail	Fail	Fail	Fail	Fail	Fail	Fail	Fail	Fail	Fail	Fail	Fail	Fail	Fail	Fail	Ixodes ricinus
NO	O-119	5	Fail	Pass	Pass	Fail	Fail	Fail	Fail	Fail	Fail	Fail	Fail	Fail	Fail	Fail	Fail	Ixodes ricinus
NO	O-119	6	Fail	Pass	Fail	Fail	Pass	Fail	Fail	Pass	Fail	Fail	Fail	Fail	Fail	Fail	Fail	Ixodes ricinus
NO	O-119	7	Pass	Pass	Pass	Fail	Pass	Fail	Pass	Fail	Fail	Fail	Fail	Fail	Fail	Fail	Fail	Ixodes ricinus
NO	O-119	8	Fail	Pass	Fail	Fail	Pass	Fail	Fail	Pass	Fail	Fail	Fail	Pass	Fail	Fail	Fail	Ixodes ricinus
NO	O-119	9	Pass	Pass	Fail	Fail	Pass	Fail	Fail	Pass	Fail	Fail	Fail	Fail	Fail	Fail	Fail	Ixodes ricinus
NO	O-119	10	Fail	Pass	Pass	Fail	Pass	Fail	Pass	Pass	Fail	Fail	Fail	Fail	Pass	Fail	Fail	Ixodes ricinus
NO	O-119	11	Fail	Pass	Fail	Pass	Fail	Fail	Fail	Pass	Fail	Fail	Fail	Fail	Fail	Fail	Fail	Ixodes ricinus
NO	O-119	12	Fail	Pass	Pass	Fail	Pass	Fail	Fail	Pass	Fail	Fail	Fail	Fail	Fail	Pass	Pass	Ixodes ricinus
NO	O-119	13	Fail	Pass	Pass	Fail	Pass	Fail	Pass	Fail	Fail	Fail	Fail	Fail	Fail	Fail	Fail	Ixodes ricinus
NO	O-119	14	Fail	Pass	Fail	Fail	Pass	Fail	Fail	Pass	Fail	Fail	Fail	Fail	Pass	Fail	Fail	Ixodes ricinus
NO	O-119	15	Fail	Pass	Pass	Fail	Pass	Fail	Pass	Fail	Fail	Fail	Fail	Fail	Pass	Fail	Fail	Ixodes ricinus
NO	O-119	16	Fail	Pass	Pass	Fail	Fail	Fail	Fail	Fail	Fail	Fail	Fail	Fail	Fail	Fail	Fail	Ixodes ricinus
NO	O-119	17	Fail	Pass	Fail	Fail	Pass	Fail	Fail	Fail	Fail	Fail	Fail	Fail	Pass	Fail	Fail	Ixodes ricinus
NO	O-119	18	Fail	Pass	Pass	Fail	Fail	Fail	Fail	Fail	Fail	Fail	Fail	Fail	Fail	Fail	Fail	Ixodes ricinus
NO	O-119	19	Fail	Pass	Pass	Fail	Pass	Fail	Fail	Fail	Fail	Fail	Fail	Fail	Pass	Fail	Fail	Ixodes ricinus
NO	O-119	20	Fail	Pass	Pass	Fail	Pass	Fail	Fail	Pass	Fail	Fail	Fail	Fail	Fail	Fail	Fail	Ixodes ricinus
NO	O-119	21	Fail	Fail	Fail	Fail	Fail	Fail	Fail	Fail	Fail	Fail	Fail	Fail	Fail	Fail	Fail	Ixodes ricinus
NO	O-119	22	Fail	Pass	Pass	Fail	Fail	Fail	Fail	Fail	Fail	Fail	Fail	Fail	Fail	Fail	Fail	Ixodes ricinus
NO	O-119	23	Fail	Pass	Fail	Fail	Pass	Fail	Pass	Fail	Fail	Fail	Fail	Fail	Fail	Fail	Pass	Ixodes ricinus
NO	O-119	24	Pass	Pass	Fail	Fail	Fail	Fail	Fail	Fail	Fail	Fail	Fail	Fail	Fail	Fail	Fail	Ixodes ricinus
NO	O-119	25	Fail	Pass	Fail	Fail	Pass	Fail	Pass	Fail	Fail	Fail	Fail	Fail	Pass	Fail	Fail	Ixodes ricinus
NO	O-119	26	Fail	Pass	Pass	Fail	Fail	Fail	Fail	Fail	Fail	Fail	Fail	Fail	Pass	Fail	Fail	Ixodes ricinus
NO	O-119	27	Fail	Pass	Pass	Fail	Fail	Fail	Fail	Fail	Fail	Fail	Fail	Fail	Fail	Fail	Fail	Ixodes ricinus
NO	O-119	28	Fail	Pass	Pass	Fail	Pass	Fail	Fail	Pass	Fail	Fail	Fail	Fail	Fail	Fail	Fail	Ixodes ricinus
NO	O-119	29	Fail	Pass	Fail	Fail	Pass	Fail	Fail	Fail	Fail	Fail	Fail	Fail	Fail	Fail	Fail	Ixodes ricinus
NO	O-119	30	Fail	Pass	Fail	Pass	Pass	Fail	Fail	Pass	Fail	Fail	Fail	Fail	Fail	Fail	Fail	Ixodes ricinus
NO	O-119	31	Fail	Fail	Fail	Fail	Fail	Fail	Fail	Fail	Fail	Fail	Fail	Fail	Pass	Fail	Pass	Ixodes ricinus
NO	O-119	32	Fail	Pass	Pass	Fail	Pass	Fail	Pass	Fail	Fail	Fail	Fail	Fail	Fail	Fail	Fail	Ixodes ricinus
NO	O-119	33	Fail	Pass	Pass	Fail	Pass	Fail	Fail	Fail	Pass	Fail	Fail	Fail	Pass	Fail	Pass	Ixodes ricinus
NO	O-119	34	Fail	Pass	Pass	Fail	Pass	Fail	Fail	Pass	Fail	Fail	Fail	Fail	Pass	Fail	Fail	Ixodes ricinus
NO	O-119	35	Fail	Pass	Pass	Fail	Pass	Fail	Fail	Pass	Fail	Fail	Fail	Fail	Pass	Fail	Fail	Ixodes ricinus
NO	O-119	36	Fail	Pass	Pass	Fail	Fail	Fail	Fail	Fail	Fail	Fail	Fail	Fail	Pass	Fail	Pass	Ixodes ricinus
NO	O-119	37	Fail	Pass	Fail	Fail	Pass	Fail	Fail	Fail	Fail	Fail	Fail	Fail	Fail	Fail	Fail	Ixodes ricinus
NO	O-119	38	Fail	Pass	Pass	Fail	Fail	Fail	Fail	Fail	Fail	Fail	Fail	Fail	Pass	Fail	Fail	Ixodes ricinus
NO	O-119	39	Fail	Pass	Fail	Pass	Pass	Fail	Fail	Fail	Fail	Fail	Fail	Pass	Fail	Fail	Fail	Ixodes ricinus
NO	O-119	40	Fail	Pass	Pass	Fail	Fail	Fail	Fail	Fail	Fail	Fail	Fail	Fail	Pass	Fail	Fail	Ixodes ricinus
[truncated: 945 more rows]
